# Supplementary material for: Diabetes care cascade and associated factors in 10 700 middle-aged adults in four sub-Saharan African countries: a cross-sectional study
Source: PubMed Central journal article supplement — BMJ Open. 2023 Apr 27;13(4):e069193. doi: 10.1136/bmjopen-2022-069193 (PMC10151877; doi:10.1136/bmjopen-2022-069193), 2023-04-27
Supplement: bmjopen-2022-069193.draft_revisions.pdf [file bmjopen-2022-069193.draft_revisions.pdf]

# BMJ Open

BMJ Open is committed to open peer review. As part of this commitment we make the peer review history of every article we publish publicly available.

When an article is published we post the peer reviewers' comments and the authors' responses online. We also post the versions of the paper that were used during peer review. These are the versions that the peer review comments apply to.

The versions of the paper that follow are the versions that were submitted during the peer review process. They are not the versions of record or the final published versions. They should not be cited or distributed as the published version of this manuscript.

BMJ Open is an open access journal and the full, final, typeset and author-corrected version of record of the manuscript is available on our site with no access controls, subscription charges or pay-per-view fees (<http://bmjopen.bmj.com>).

If you have any questions on BMJ Open's open peer review process please email [info.bmjopen@bmj.com](mailto:info.bmjopen@bmj.com)

# BMJ Open

## Diabetes care cascade and associated factors in 10,700 middle-aged adults in four sub-Saharan African countries

|                               |                                                                                                                                                                                                                                                                                                                                                                                                                                                                                                                                                                                                                                                                                                                                                                                                                                                                                                                                                                                                                                                                                                                                                                                                                                                                                                                                                                                                                                                                                                                                                                                                                                                                                                                                                                                                                                                                                                                                                                                                                                                                                                                                                                                                                                                                                                           |
|-------------------------------|-----------------------------------------------------------------------------------------------------------------------------------------------------------------------------------------------------------------------------------------------------------------------------------------------------------------------------------------------------------------------------------------------------------------------------------------------------------------------------------------------------------------------------------------------------------------------------------------------------------------------------------------------------------------------------------------------------------------------------------------------------------------------------------------------------------------------------------------------------------------------------------------------------------------------------------------------------------------------------------------------------------------------------------------------------------------------------------------------------------------------------------------------------------------------------------------------------------------------------------------------------------------------------------------------------------------------------------------------------------------------------------------------------------------------------------------------------------------------------------------------------------------------------------------------------------------------------------------------------------------------------------------------------------------------------------------------------------------------------------------------------------------------------------------------------------------------------------------------------------------------------------------------------------------------------------------------------------------------------------------------------------------------------------------------------------------------------------------------------------------------------------------------------------------------------------------------------------------------------------------------------------------------------------------------------------|
| Journal:                      | <i>BMJ Open</i>                                                                                                                                                                                                                                                                                                                                                                                                                                                                                                                                                                                                                                                                                                                                                                                                                                                                                                                                                                                                                                                                                                                                                                                                                                                                                                                                                                                                                                                                                                                                                                                                                                                                                                                                                                                                                                                                                                                                                                                                                                                                                                                                                                                                                                                                                           |
| Manuscript ID                 | bmjopen-2022-069193                                                                                                                                                                                                                                                                                                                                                                                                                                                                                                                                                                                                                                                                                                                                                                                                                                                                                                                                                                                                                                                                                                                                                                                                                                                                                                                                                                                                                                                                                                                                                                                                                                                                                                                                                                                                                                                                                                                                                                                                                                                                                                                                                                                                                                                                                       |
| Article Type:                 | Original research                                                                                                                                                                                                                                                                                                                                                                                                                                                                                                                                                                                                                                                                                                                                                                                                                                                                                                                                                                                                                                                                                                                                                                                                                                                                                                                                                                                                                                                                                                                                                                                                                                                                                                                                                                                                                                                                                                                                                                                                                                                                                                                                                                                                                                                                                         |
| Date Submitted by the Author: | 12-Oct-2022                                                                                                                                                                                                                                                                                                                                                                                                                                                                                                                                                                                                                                                                                                                                                                                                                                                                                                                                                                                                                                                                                                                                                                                                                                                                                                                                                                                                                                                                                                                                                                                                                                                                                                                                                                                                                                                                                                                                                                                                                                                                                                                                                                                                                                                                                               |
| Complete List of Authors:     | <p>Wade, Alisha N.; University of the Witwatersrand Johannesburg Faculty of Health Sciences, MRC/Wits Rural Public Health and Health Transitions Research Unit, School of Public Health</p> <p>Maposa, Innocent; University of the Witwatersrand Johannesburg Faculty of Health Sciences, Division of Epidemiology and Biostatistics</p> <p>Agongo, Godfred; Navrongo Health Research Centre; C K Tedam University of Technology and Applied Sciences, Department of Biochemistry and Forensic Science, School of Chemical and Biochemical Sciences</p> <p>Asiki, G; African Population and Health Research Center, Health and Systems for Health Unit</p> <p>Boua, Palwende; Institut de Recherche en Sciences de la Sante, Clinical Research Unit of Nanoro</p> <p>Choma, Solomon SR; University of Limpopo, Department of Pathology and Medical Sciences, DIMAMO Population Health Research Centre</p> <p>Gómez-Olivé, F. Xavier; University of the Witwatersrand Johannesburg Faculty of Health Sciences, MRC/Wits Rural Public Health and Health Transitions Research Unit, School of Public Health</p> <p>Maimela, Eric; University of Limpopo, Department of Public Health</p> <p>Micklesfield, Lisa; University of the Witwatersrand Johannesburg Faculty of Health Sciences, South African MRC Developmental Pathways for Health Research Unit, School of Clinical Medicine</p> <p>Mohamed, Shukri; African Population and Health Research Center, Health and Systems for Health Unit</p> <p>Nonterah, Engelbert ; Navrongo Health Research Centre</p> <p>Norris, Shane; University of the Witwatersrand Johannesburg Faculty of Health Sciences, South African MRC Developmental Pathways for Health Research Unit, School of Clinical Medicine; University of Southampton, Global Health Research Institute, School of Health and Human Development</p> <p>Sorgho, Hermann ; Institut de Recherche en Sciences de la Sante, Clinical Research Unit of Nanoro</p> <p>Ramsay, Michele; University of the Witwatersrand Johannesburg Faculty of Health Sciences, Sydney Brenner Institute for Molecular Bioscience</p> <p>Crowther, Nigel John; University of the Witwatersrand Johannesburg Faculty of Health Sciences, Department of Chemical Pathology, National Health Laboratory Service</p> |
| Keywords:                     | General diabetes < DIABETES & ENDOCRINOLOGY, PUBLIC HEALTH, International health services < HEALTH SERVICES ADMINISTRATION & MANAGEMENT                                                                                                                                                                                                                                                                                                                                                                                                                                                                                                                                                                                                                                                                                                                                                                                                                                                                                                                                                                                                                                                                                                                                                                                                                                                                                                                                                                                                                                                                                                                                                                                                                                                                                                                                                                                                                                                                                                                                                                                                                                                                                                                                                                   |

1  
2  
3  
4  
5  
6  
7  
8  
9  
10  
11  
12  
13  
14  
15  
16  
17  
18  
19  
20  
21  
22  
23  
24  
25  
26  
27  
28  
29  
30  
31  
32  
33  
34  
35  
36  
37  
38  
39  
40  
41  
42  
43  
44  
45  
46  
47  
48  
49  
50  
51  
52  
53  
54  
55  
56  
57  
58  
59  
60



SCHOLARONE™  
Manuscripts



I, the Submitting Author has the right to grant and does grant on behalf of all authors of the Work (as defined in the below author licence), an exclusive licence and/or a non-exclusive licence for contributions from authors who are: i) UK Crown employees; ii) where BMJ has agreed a CC-BY licence shall apply, and/or iii) in accordance with the terms applicable for US Federal Government officers or employees acting as part of their official duties; on a worldwide, perpetual, irrevocable, royalty-free basis to BMJ Publishing Group Ltd ("BMJ") its licensees and where the relevant Journal is co-owned by BMJ to the co-owners of the Journal, to publish the Work in this journal and any other BMJ products and to exploit all rights, as set out in our [licence](#).

The Submitting Author accepts and understands that any supply made under these terms is made by BMJ to the Submitting Author unless you are acting as an employee on behalf of your employer or a postgraduate student of an affiliated institution which is paying any applicable article publishing charge ("APC") for Open Access articles. Where the Submitting Author wishes to make the Work available on an Open Access basis (and intends to pay the relevant APC), the terms of reuse of such Open Access shall be governed by a Creative Commons licence – details of these licences and which [Creative Commons](#) licence will apply to this Work are set out in our licence referred to above.

Other than as permitted in any relevant BMJ Author's Self Archiving Policies, I confirm this Work has not been accepted for publication elsewhere, is not being considered for publication elsewhere and does not duplicate material already published. I confirm all authors consent to publication of this Work and authorise the granting of this licence.

1  
2  
3 Full title: Diabetes care cascade and associated factors in 10,700 middle-aged adults  
4  
5 in four sub-Saharan African countries  
6  
7  
8  
9

10 Running title: Diabetes care cascade in sub-Saharan Africa  
11  
12  
13  
14

15 Authors: Alisha N. Wade DPhil<sup>a</sup>, Innocent Maposa PhD<sup>b</sup>, Godfred Agongo PhD<sup>c,d</sup>,  
16  
17 Gershim Asiki PhD<sup>e</sup>, Palwende Romuald Boua PhD<sup>f</sup>, Solomon Choma MSc<sup>g</sup>, F.  
18  
19 Xavier Gómez-Olivé PhD<sup>a</sup>, Eric Maimela PhD<sup>h</sup>, Lisa K. Micklesfield PhD<sup>i</sup>, Shukri F.  
20  
21 Mohamed PhD<sup>e</sup>, Engelbert A. Nonterah PhD<sup>c</sup>, Shane A. Norris PhD<sup>i,j</sup>, Hermann  
22  
23 Sorgho PhD<sup>f</sup>, Michèle Ramsay PhD<sup>k</sup>, Nigel J. Crowther PhD<sup>l</sup> as members of AWI-  
24  
25 Gen and the H3Africa Consortium  
26  
27  
28  
29

30 Author affiliations: <sup>a</sup>MRC/Wits Rural Public Health and Health Transitions Research  
31  
32 Unit, School of Public Health, Faculty of Health Sciences, University of the  
33  
34 Witwatersrand, 27 St. Andrew's Road, Parktown, Johannesburg 2193, South Africa;  
35  
36 <sup>b</sup>Division of Epidemiology and Biostatistics, School of Public Health, Faculty of  
37  
38 Health Sciences, University of the Witwatersrand, 27 St. Andrew's Road, Parktown,  
39  
40 Johannesburg 2193, South Africa; <sup>c</sup>Navrongo Health Research Centre, Ghana  
41  
42 Health Service, Post Office Box 114, Navrongo, Upper East Region, Ghana;  
43  
44 <sup>d</sup>Department of Biochemistry and Forensic Science, School of Chemical and  
45  
46 Biochemical Sciences, C. K. Tedam University of Technology and Applied Sciences,  
47  
48 Box 24 Navrongo, Ghana; <sup>e</sup>Health and Systems for Health Unit, P.O. Box 10787-  
49  
50 00100, African Population and Health Research Centre, Nairobi, Kenya; <sup>f</sup>Clinical  
51  
52 Research Unit of Nanoro, Institut de Recherche en Sciences de la Santé, Nanoro,  
53  
54 Burkina Faso; <sup>g</sup>Department of Pathology and Medical Sciences, DIMAMO Population  
55  
56 Health Research Centre, University of Limpopo, Private Bag X1106 Sovenga 0727,  
57  
58  
59  
60

1  
2  
3 South Africa; <sup>h</sup>Department of Public Health, University of Limpopo, 1<sup>st</sup> University  
4 Road, Sovenga, 0727, South Africa; <sup>i</sup>South African MRC Developmental Pathways  
5 for Health Research Unit, School of Clinical Medicine, Faculty of Health Sciences,  
6 University of the Witwatersrand, 7 York Road, Parktown, Johannesburg 2193, South  
7 Africa; <sup>j</sup>Global Health Research Institute, School of Health and Human Development,  
8 University of Southampton, University Road, Southampton SO17 1BJ, United  
9 Kingdom; <sup>k</sup>Sydney Brenner Institute for Molecular Bioscience, Faculty of Health  
10 Sciences, University of the Witwatersrand, 9 Jubilee Road, Parktown, Johannesburg  
11 2193, South Africa; <sup>l</sup>Department of Chemical Pathology, National Health Laboratory  
12 Service, Faculty of Health Sciences, University of the Witwatersrand, 7 York Road,  
13 Parktown, Johannesburg 2193, South Africa  
14  
15  
16  
17  
18  
19  
20  
21  
22  
23  
24  
25  
26  
27  
28  
29  
30  
31

32 Corresponding author: Alisha N. Wade DPhil, MRC/Wits Rural Public Health and  
33 Health Transitions Research Unit, School of Public Health, University of the  
34 Witwatersrand, 27 St. Andrew's Road, Parktown, Johannesburg, 2193, South Africa.  
35  
36  
37  
38  
39 Tel:+27 11 717 2511; Fax:+27 86 765 2753; Email: alisha.wade@wits.ac.za  
40  
41  
42  
43  
44

45 Word counts:

46  
47  
48 Abstract (limit 300 words): 283 words  
49

50  
51 Main text (limit 4,000 words): 3214 words  
52  
53  
54  
55  
56  
57  
58  
59  
60

## Abstract

Introduction: Prevalent diabetes-associated morbidity and mortality in sub-Saharan Africa reflect the failure of the health care system to appropriately identify and manage patients with diabetes. We investigated progression through the care cascade and associated factors for people with diabetes in sub-Saharan Africa to identify attrition stages that may be most appropriate for targeted intervention.

Research Design and Methods: Data were analysed from 10,700 individuals, aged 40-60 years, in a community-based, cross-sectional study in four sub-Saharan African countries. Age-adjusted diabetes prevalence (self-report, fasting plasma glucose [FPG]  $\geq 7$  mmol/l or random plasma glucose  $\geq 11.1$  mmol/l) was calculated and proportions of those who reported awareness of having diabetes and receiving treatment were sequentially determined. Diabetes control (FPG  $< 7.2$  mmol/l) was calculated as a proportion of those receiving treatment. Logistic regression was used to investigate factors associated with having diabetes and being aware of the diagnosis.

Results: Diabetes prevalence was 5.5% (95%CI 4.4-6.5%). Approximately half of those with diabetes were aware (54%; 95%CI 50-58%); 73% (95%CI 67-79%) of aware individuals reported treatment. However, only 38% (95%CI 30-46%) of those treated were adequately controlled. Older age (OR 1.1; 95%CI 1.0-1.1), urban residence (OR 2.3; 95%CI 1.6-3.5), hypertension (OR 1.9; 95%CI 1.5-2.4), family history of diabetes (OR 3.9; 95%CI 3.0-5.1), and measures of central adiposity were associated with higher odds of having diabetes. Older age (OR 1.1; 95%CI 1.0-1.1), semi-rural residence (OR 2.5; 95%CI 1.1-5.7), secondary education (OR 2.4; 95%CI

1  
2  
3 1.2-4.9), hypertension (OR 1.6; 95%CI 1.0-2.4), and HIV (OR 2.3; 95%CI 1.2-4.4)  
4  
5 were associated with greater likelihood of awareness.  
6  
7  
8  
9

10 Conclusions: There is attrition at each stage of the diabetes care cascade in sub-  
11  
12 Saharan Africa. Public health strategies should target improving diagnosis in high-  
13  
14 risk individuals and intensifying therapy in individuals treated for diabetes.  
15  
16  
17  
18

19 Keywords: diabetes mellitus, sub-Saharan Africa  
20  
21  
22  
23  
24  
25  
26  
27  
28  
29  
30  
31  
32  
33  
34  
35  
36  
37  
38  
39  
40  
41  
42  
43  
44  
45  
46  
47  
48  
49  
50  
51  
52  
53  
54  
55  
56  
57  
58  
59  
60

For peer review only



## KEY MESSAGES

### What is already known on this topic?

The prevalence of diabetes in sub-Saharan Africa is expected to increase dramatically while diabetes-related morbidity and mortality in the region remain high.

### What this study adds?

Just over half of individuals with diabetes in this cross-sectional multi-country study of 10,700 adults in sub-Saharan Africa were aware of their condition and while 73% reported receiving treatment, fewer than 40% of those receiving treatment achieved glycaemic targets.

### How might this study affect research, practice or policy?

Focus should be placed on diagnosing diabetes in at-risk individuals and intensifying therapy in those already diagnosed with diabetes in sub-Saharan Africa.

## INTRODUCTION

Sub-Saharan Africa (SSA) is projected to experience a 143% increase in diabetes prevalence by 2045.[1] Inadequate control of blood sugar and other cardiovascular risk factors will impose an unsustainable burden of diabetes-related complications on already constrained regional health care systems. Existing data suggest that outcomes in individuals in SSA with diabetes are currently suboptimal with over 350,000 diabetes-related deaths in 2019,[1] highlighting the need to improve clinical care. Optimisation of diabetes management is contingent on numerous factors including the diagnosis of diabetes, appropriate escalation of therapy and patient adherence to therapeutic interventions, but effective strategies to improve diabetes management in SSA are hampered by a lack of knowledge about the extent of the deficiencies in this care continuum.

The cascade of care model, frequently used to identify deficits in HIV care, may be applied to diabetes to identify opportunities for improved outcomes.[2] The elements of the cascade namely prevalence, awareness, treatment and control reflect aspects of the health care system, including effectiveness of prevention and detection strategies and the ability to implement and escalate therapy as necessary. On an individual level, diabetes awareness in particular is key to the adherence to lifestyle modification and medication that underpin glycaemic control. Evaluation of the diabetes care cascade allows policy makers to assess how well the health care system manages patients with diabetes and to identify areas for targeted interventions, particularly important in the resource-constrained lower and middle-income countries of SSA.

1  
2  
3 Despite the benefits of establishing the diabetes care cascade, there is a paucity of  
4 primary data on it in SSA. Studies have often been limited to diabetes prevalence  
5 and awareness and conducted in hospital-based populations, introducing selection  
6 bias, while multi-country studies that have reported on the entire cascade have  
7 meta-analysed data from heterogeneous studies with methodological differences in  
8 determining each cascade stage. We aimed to evaluate the diabetes cascade of  
9 care in four SSA countries, using harmonised data collected across six sites. We  
10 further investigated factors associated with the likelihood of having diabetes and  
11 being aware of a diagnosis of diabetes, the first two steps in the cascade.  
12  
13  
14  
15  
16  
17  
18  
19  
20  
21  
22  
23  
24  
25

## 26 **METHODS**

### 27 **Study Setting and Participants**

28  
29 The AWI-Gen study and participating sites have been described in detail  
30 elsewhere.[3,4] In brief, 10,700 individuals, aged 40-60 years, were recruited from  
31 six sites in SSA in a community-based, cross-sectional study conducted between  
32 August 2013 and August 2016. Three of these sites were in South Africa (Soweto,  
33 Agincourt and Dikgale), one was in Kenya (Nairobi), one in Ghana (Navrongo) and  
34 one in Burkina Faso (Nanoro). Participants were therefore included from southern,  
35 eastern and western Africa. The selected sites were also on a continuum of  
36 urbanisation: Nairobi and Soweto were urban sites, Agincourt and Dikgale were  
37 semi-rural and Nanoro and Navrongo were rural.  
38  
39  
40  
41  
42  
43  
44  
45  
46  
47  
48  
49  
50  
51  
52  
53

54 With the exception of Soweto, each study site is home to a Health and socio-  
55 Demographic Surveillance System (HDSS) which enumerates all residents within the  
56 HDSS on a regular basis, ensuring a well-defined population sampling frame. In  
57  
58  
59  
60

1  
2  
3 Nairobi, Agincourt, Navrongo and Nanoro, individuals were randomly sampled from  
4 the sampling frame, while in Dikgale, a convenience sampling strategy was  
5 employed. In Soweto, 700 women who were participants in the Study of Women  
6 Entering an Endocrine Transition (SWEET) study[5] and caregivers of the Birth to  
7 Twenty+ cohort[6] were recruited. Additional female and all male participants were  
8 randomly recruited, using a sampling frame which covered the Soweto region.  
9  
10 Where necessary, there was oversampling to ensure equal numbers of women and  
11 men.  
12  
13  
14  
15  
16  
17  
18  
19  
20  
21  
22  
23

### 24 **Ethical Considerations**

25  
26 Written informed consent was provided by participants in their local languages.  
27  
28 Ethical approval for the AWI-Gen study was provided by the Human Research Ethics  
29 Committee (Medical) of the University of the Witwatersrand (M121029, M170880).  
30  
31 Each of the HDSS centres also obtained ethical approval according to their  
32  
33  
34  
35  
36  
37  
38  
39  
40  
41  
42  
43  
44  
45  
46  
47  
48  
49  
50  
51  
52  
53  
54  
55  
56  
57  
58  
59  
60

### 40 **Patient and public involvement**

41  
42 Prior to the initiation of the AWI-Gen studies, an extensive process of community  
43 engagement was conducted. This included meetings with civic and traditional  
44 leadership structures, household visits and group information sessions to discuss  
45  
46  
47  
48  
49  
50  
51  
52  
53  
54  
55  
56  
57  
58  
59  
60

### 56 **Data Collection and Definitions**

1  
2  
3 Data were collected by study staff trained on standardised protocols.  
4

5 Sociodemographic data and personal and family medical history were self-reported.  
6

7 Additionally, individuals were considered to have hypertension if the mean systolic  
8 blood pressure of the latter two of three readings at the study visit  $\geq 140$  mmHg or the  
9 mean diastolic pressure  $\geq 90$  mmHg (Omron M6, Omron, Kyoto, Japan). Individuals  
10 were classified as HIV positive if they reported a previous diagnosis of HIV or if they  
11 tested positive on the rapid HIV tests that were offered to participants in South Africa  
12 and Kenya (MD HIV 1/2 test [Medical Diagnostech, Cape Town, South Africa]; One  
13 Step anti-HIV1+2 rapid screen test [InTec, Xiamen, China]; Determine rapid test kit  
14 [Abbot Pharmaceuticals, Chicago, USA]). Rapid HIV tests were not offered in Ghana  
15 and Burkina Faso due to the low prevalence of HIV in those countries; individuals in  
16 these sites who did not know their HIV status were classified as HIV negative.  
17  
18  
19  
20  
21  
22  
23  
24  
25  
26  
27  
28  
29

30 Physical activity was assessed using the Global Physical Activity Questionnaire and  
31 occupational, leisure time and travel-related physical activity variables from this  
32 questionnaire were summed to give the total moderate-vigorous intensity physical  
33 activity (MVPA) in minutes per week. Individuals were classified as having no MVPA  
34 (0 minutes/week), insufficient MVPA (1-150 minutes/week) or sufficient MVPA ( $\geq 150$   
35 minutes/week).<sup>[7]</sup>  
36  
37  
38  
39  
40  
41  
42  
43  
44  
45  
46

47 Standing height was measured with the participant barefoot or in light socks, using a  
48 Harpenden digital stadiometer (Holtain, Wales, UK). Weight was measured with the  
49 participant in light clothing, using a digital Physician Large Dial 200 kg capacity scale  
50 (Kendon Medical, South Africa) and body mass index was calculated as weight in kg  
51 divided by height in metres squared. Using a stretch-resistant measuring tape  
52  
53  
54  
55  
56  
57  
58  
59  
60

1  
2  
3 (SECA, Hamburg, Germany), hip circumference, as a measure of gluteofemoral fat,  
4  
5 was measured around the most protruding part of the buttocks.  
6  
7  
8  
9

10 Visceral and subcutaneous adipose tissue, direct measures of central adiposity  
11 associated with insulin resistance, were measured using abdominal ultrasound  
12 (LOGIQ e ultrasound system [GE Healthcare, CT, USA]). Visceral adipose thickness  
13 was determined by the thickness of the fat pad between the anterior spine and  
14 peritoneal layer at end expiration, while subcutaneous adipose thickness was the  
15 thickness of the fat pad between the skin and the outer edge of the linea alba.  
16  
17  
18  
19  
20  
21  
22  
23  
24  
25

26 Venous blood was collected in potassium oxalate/sodium fluoride tubes and  
27 centrifuged after collection, with the supernatant plasma stored at  $-80^{\circ}\text{C}$  until  
28 analysis. Analyses for glucose were all performed at a central site, using colorimetric  
29 methods, on the Randox Plus clinical chemistry analyser (Randox, UK) with a range  
30 of 0.36–35 mmol/l and coefficient of variation  $<2.3\%$ .  
31  
32  
33  
34  
35  
36  
37  
38  
39

40 Diabetes was defined as a previous diagnosis of diabetes by a health care provider,  
41 ever having received treatment for diabetes, or fasting plasma glucose  $\geq 7$  mmol/l or  
42 random plasma glucose  $\geq 11.1$  mmol/l on the sample taken during the study visit.  
43  
44  
45

46 Samples were considered random if a participant had not fasted overnight or fasting  
47 status could not be confirmed. Participants were considered to be aware of a  
48 diagnosis of diabetes if they reported ever having been told by a health professional  
49 that they had diabetes and were considered to have been treated for diabetes if they  
50 reported ever having received treatment for diabetes (dietary advice and/or glucose  
51  
52  
53  
54  
55  
56  
57  
58  
59  
60

1  
2  
3 lowering agents) from a health care professional. Individuals were considered to  
4  
5 have their diabetes controlled if fasting glucose was  $<7.2$  mmol/l.[8]  
6  
7  
8  
9

## 10 **Statistical Analysis**

11  
12 Categorical participant characteristics were described using frequencies and  
13  
14 percentages, while medians and interquartile ranges (IQR) were used to describe  
15  
16 continuous characteristics. The Mann-Whitney U, chi-squared and Fisher's exact  
17  
18 tests were used to compare continuous and categorical variables respectively  
19  
20  
21 between groups defined by sex and missingness status.  
22  
23  
24  
25

26 Age-adjusted diabetes prevalence was determined using the United Nations African  
27  
28 population distribution[9] as the reference population structure. The proportion of  
29  
30 those aware of having diabetes was calculated as a percentage of those with  
31  
32 diabetes and similarly, the proportion of those receiving treatment for diabetes was  
33  
34 calculated as a percentage of those aware of having diabetes; the proportion of  
35  
36 those who had their diabetes controlled was calculated as a percentage of those  
37  
38 who reported receiving treatment. The method for interval estimation described by  
39  
40 Tiwari et al.[10] was used to determine the 95% confidence intervals.  
41  
42  
43  
44  
45  
46

47 Multivariable logistic regression was used to assess the relationship between the  
48  
49 odds of having diabetes and sociodemographic and clinical characteristics including  
50  
51 urbanicity; independent variables were selected based on previous research.[11,12]  
52  
53 The Soweto site did not collect data on family history of diabetes and was therefore  
54  
55 not included in this model. Additional multivariable logistic regression models were  
56  
57 also fit, using data from all sites, to investigate associations with awareness of a  
58  
59  
60

1  
2  
3 diagnosis of diabetes. In the model investigating associations with odds of having  
4 diabetes, we included visceral and subcutaneous fat as direct assessments of  
5 central obesity and hip circumference as a measure of gluteofemoral fat. In the  
6 model investigating associations with awareness, we used body mass index as the  
7 measure of obesity as we thought awareness was more likely to be associated with  
8 a global assessment of obesity rather than individual fat depots. We were  
9 underpowered to assess associations with diabetes treatment and control.  
10  
11  
12  
13  
14  
15  
16  
17  
18  
19  
20

21 Sensitivity analyses were conducted in which associations with having diabetes and  
22 awareness of a diagnosis of diabetes were explored in analyses stratified by HIV  
23 prevalence, with the South African sites and Nairobi classified as high prevalence  
24 sites and Navrongo and Nanoro classified as low prevalence sites.  
25  
26  
27  
28  
29  
30

31  
32  
33 Missing data were handled using pairwise deletion. Analyses were conducted using  
34 STATA v16 (StataCorp, USA).  
35  
36  
37  
38  
39

## 40 **RESULTS**

### 41 **Sample Characteristics**

42  
43 The characteristics of the 10,700 study participants are shown in Table 1. There  
44 were 5,892 women (55%), with a median age of 50 years (IQR 45-55). There was  
45 some inter-site variation in sociodemographic variables - while most participants in  
46 the urban and semi-rural sites had some formal education, between 70-80% of  
47 participants in the rural sites did not. Smoking prevalence ranged between 6% and  
48 30% overall, with prevalence several fold higher in men than in women in all sites.  
49  
50  
51  
52  
53  
54  
55  
56  
57  
58  
59  
60  
61  
62  
63  
64  
65  
66  
67  
68  
69  
70  
71  
72  
73  
74  
75  
76  
77  
78  
79  
80  
81  
82  
83  
84  
85  
86  
87  
88  
89  
90  
91  
92  
93  
94  
95  
96  
97  
98  
99  
100



1  
2  
3 hypertension and 1,310 (12%) having HIV, although inter-site variation was evident,  
4  
5 with HIV prevalence being low, for example, in Nanoro and Navrongo. Family history  
6  
7 of diabetes was highest in the urban and semi-rural areas. Anthropometric measures  
8  
9 of obesity and subcutaneous fat were higher in women in urban and semi-urban  
10  
11 areas, while there were no clear sex differences in Nanoro and Navrongo. Visceral  
12  
13 fat was generally similar in both sexes. The majority of individuals (82%) were  
14  
15 undertaking at least 150 minutes of moderate to vigorous physical activity weekly.  
16  
17  
18  
19  
20  
21  
22  
23  
24  
25  
26  
27  
28  
29  
30  
31  
32  
33  
34  
35  
36  
37  
38  
39  
40  
41  
42  
43  
44  
45  
46  
47  
48  
49  
50  
51  
52  
53  
54  
55  
56  
57  
58  
59  
60

For peer review only

1  
2

Table 1. Demographic and clinical characteristics of 10,700 study participants in six sub-Saharan African sites

|                                | Soweto         |                |               | Agincourt     |               |               | Dikgale       |               |               | Nanoro         |                |               | Navrongo      |                |               | Nairobi       |                |               | Overall        |                |               |
|--------------------------------|----------------|----------------|---------------|---------------|---------------|---------------|---------------|---------------|---------------|----------------|----------------|---------------|---------------|----------------|---------------|---------------|----------------|---------------|----------------|----------------|---------------|
|                                | Men            | Women          | Overall       | Men           | Women         | Overall       | Men           | Women         | Overall       | Men            | Women          | Overall       | Men           | Women          | Overall       | Men           | Women          | Overall       | Men            | Women          | Overall       |
|                                | n=1,025<br>51% | n=1,002<br>49% | n=2,027       | n=573<br>39%  | n=892<br>61%  | n=1,465       | n=356<br>31%  | n=812<br>69%  | n=1,168       | n=1,045<br>50% | n=1,039<br>50% | n=2,084       | n=923<br>46%  | n=1,091<br>54% | n=2,014       | n=886<br>46%  | n=1,056<br>54% | n=1,942       | n=4,808<br>45% | n=5,892<br>55% | n=10,700      |
| Age (years)                    | 49<br>(44-55)  | 49<br>(44-54)  | 49<br>(44-54) | 51<br>(45-56) | 51<br>(46-56) | 51<br>(46-56) | 50<br>(45-55) | 51<br>(46-56) | 51<br>(45-55) | 50<br>(44-55)  | 50<br>(45-54)  | 50<br>(45-55) | 50<br>(46-55) | 52<br>(47-56)  | 51<br>(46-56) | 48<br>(44-53) | 48<br>(44-52)  | 48<br>(44-53) | 50<br>(45-55)  | 50<br>(45-55)  | 50<br>(45-55) |
| Marital status (%)             |                |                |               |               |               |               |               |               |               |                |                |               |               |                |               |               |                |               |                |                |               |
| Currently married/cohabitating | 570<br>(56)    | 266<br>(27)    | 836<br>(41)   | 445<br>(78)   | 537<br>(60)   | 982<br>(67)   | 178<br>(50)   | 427<br>(53)   | 605<br>(52)   | 1,021<br>(98)  | 794<br>(76)    | 1,815<br>(87) | 787<br>(85)   | 694<br>(64)    | 1,481<br>(74) | 808<br>(91)   | 486<br>(46)    | 1,294<br>(67) | 3,809<br>(79)  | 3,204<br>(54)  | 7,013<br>(66) |
| Never married/cohabitating     | 265<br>(26)    | 51<br>(5.1)    | 316<br>(16)   | 75<br>(13)    | 59<br>(6.6)   | 134<br>(9.2)  | 103<br>(29)   | 185<br>(23)   | 288<br>(25)   | 14<br>(1.3)    | 3<br>(0.3)     | 17<br>(0.8)   | 15<br>(1.6)   | 5<br>(0.5)     | 20<br>(1.0)   | 13<br>(1.5)   | 70<br>(6.6)    | 83<br>(4.3)   | 485<br>(10)    | 373<br>(6.3)   | 858<br>(8.0)  |
| Previously married             | 189<br>(19)    | 347<br>(35)    | 536<br>(26)   | 53<br>(9.2)   | 296<br>(33)   | 349<br>(24)   | 75<br>(22)    | 200<br>(25)   | 275<br>(24)   | 8<br>(0.8)     | 238<br>(23)    | 246<br>(12)   | 120<br>(13)   | 392<br>(36)    | 512<br>(26)   | 65<br>(7.3)   | 499<br>(47)    | 564<br>(29)   | 510<br>(11)    | 1,972<br>(33)  | 2,482<br>(23) |
| Missing                        | 1<br>(0.1)     | 338<br>(34)    | 339<br>(17)   | 0<br>(0)      | 0<br>(0)      | 0<br>(0)      | 0<br>(0)      | 0<br>(0)      | 0<br>(0)      | 2<br>(0.2)     | 4<br>(0.4)     | 6<br>(0.3)    | 1<br>(0.1)    | 0<br>(0)       | 1<br>(0.1)    | 0<br>(0)      | 1<br>(0.1)     | 1<br>(0.1)    | 4<br>(0.1)     | 343<br>(5.8)   | 347<br>(3.2)  |
| Highest level of education (%) |                |                |               |               |               |               |               |               |               |                |                |               |               |                |               |               |                |               |                |                |               |
| No formal education            | 8<br>(0.8)     | 2<br>(0.2)     | 10<br>(0.5)   | 23<br>(22)    | 280<br>(31)   | 403<br>(28)   | 22<br>(6.2)   | 74<br>(9.1)   | 96<br>(8.2)   | 758<br>(73)    | 960<br>(92)    | 1,718<br>(82) | 570<br>(62)   | 843<br>(77)    | 1,413<br>(70) | 34<br>(3.8)   | 113<br>(11)    | 147<br>(7.6)  | 1,515<br>(32)  | 2,272<br>(39)  | 3,787<br>(35) |
| Primary education              | 117<br>(11)    | 636<br>(64)    | 753<br>(37)   | 235<br>(41)   | 340<br>(38)   | 575<br>(39)   | 113<br>(32)   | 273<br>(34)   | 386<br>(33)   | 181<br>(17)    | 58<br>(5.6)    | 239<br>(12)   | 206<br>(22)   | 177<br>(16)    | 383<br>(19)   | 447<br>(51)   | 663<br>(63)    | 1,110<br>(57) | 1,299<br>(27)  | 2,147<br>(36)  | 3,446<br>(32) |
| Secondary education            | 748<br>(73)    | 147<br>(15)    | 895<br>(44)   | 175<br>(31)   | 223<br>(25)   | 398<br>(27)   | 204<br>(57)   | 440<br>(54)   | 644<br>(55)   | 86<br>(8.2)    | 10<br>(1)      | 96<br>(4.6)   | 118<br>(13)   | 57<br>(5.2)    | 175<br>(8.7)  | 383<br>(43)   | 276<br>(26)    | 659<br>(34)   | 1,714<br>(36)  | 1,153<br>(20)  | 2,867<br>(27) |
| Tertiary education             | 152<br>(15)    | 1<br>(0.1)     | 153<br>(7.5)  | 39<br>(6.8)   | 49<br>(5.5)   | 88<br>(6.0)   | 17<br>(4.8)   | 24<br>(3.0)   | 41<br>(3.5)   | 16<br>(1.5)    | 2<br>(0.2)     | 18<br>(0.9)   | 27<br>(2.9)   | 9<br>(0.8)     | 36<br>(1.8)   | 22<br>(2.5)   | 4<br>(0.4)     | 26<br>(1.3)   | 273<br>(5.7)   | 89<br>(1.5)    | 362<br>(3.4)  |
| Missing                        | 0<br>(0)       | 216<br>(22)    | 216<br>(10.7) | 1<br>(0.2)    | 0<br>(0.0)    | 1<br>(0.1)    | 0<br>(0)      | 1<br>(0.1)    | 1<br>(0.1)    | 4<br>(0.4)     | 9<br>(0.9)     | 13<br>(0.6)   | 2<br>(0.2)    | 5<br>(0.5)     | 7<br>(0.4)    | 0<br>(0)      | 0<br>(0)       | 0<br>(0)      | 7<br>(0.2)     | 231<br>(3.9)   | 238<br>(2.2)  |
| Employed (%)                   | 670<br>(65)    | 547<br>(55)    | 1,217<br>(60) | 197<br>(34)   | 303<br>(34)   | 500<br>(34)   | 160<br>(45)   | 279<br>(34)   | 439<br>(37)   | 1,026<br>(98)  | 1,030<br>(99)  | 2,056<br>(99) | 599<br>(65)   | 659<br>(60)    | 1,258<br>(63) | 860<br>(97)   | 966<br>(92)    | 1,826<br>(94) | 3,512<br>(73)  | 3,784<br>(64)  | 7,296<br>(68) |
| Current smoker (%)             | 540<br>(53)    | 49<br>(4.9)    | 589<br>(29)   | 155<br>(27)   | 3<br>(0.3)    | 158<br>(11)   | 225<br>(63)   | 25<br>(3.1)   | 250<br>(21)   | 142<br>(14)    | 0<br>(0)       | 142<br>(6.8)  | 388<br>(42)   | 21<br>(1.9)    | 409<br>(20)   | 208<br>(24)   | 27<br>(2.6)    | 235<br>(12)   | 1,658<br>(35)  | 125<br>(2.1)   | 1,783<br>(17) |
| Hypertension (%)               | 550<br>(54)    | 552<br>(55)    | 1102<br>(54)  | 251<br>(44)   | 517<br>(58)   | 768<br>(52)   | 116<br>(33)   | 392<br>(49)   | 508<br>(44)   | 215<br>(21)    | 127<br>(12)    | 342<br>(17)   | 227<br>(25)   | 274<br>(25)    | 501<br>(25)   | 204<br>(23)   | 319<br>(30)    | 523<br>(27)   | 1,563<br>(33)  | 2,181<br>(37)  | 3,744<br>(35) |
| HIV positive (%)               | 189<br>(18)    | 121<br>(12)    | 310<br>(15)   | 186<br>(33)   | 304<br>(34)   | 490<br>(33)   | 73<br>(21)    | 175<br>(22)   | 248<br>(21)   | 5<br>(0.5)     | 4<br>(0.4)     | 9<br>(0.4)    | 9<br>(1.0)    | 6<br>(0.6)     | 15<br>(0.7)   | 67<br>(7.6)   | 171<br>(16)    | 238<br>(12)   | 529<br>(11)    | 781<br>(13)    | 1,310<br>(12) |

40  
41  
42  
43  
44  
45  
46

1

2

|                                        |                   |                     |                    |                   |                    |                    |                  |                    |                    |                  |                  |                  |                  |                  |                  |                  |                    |                   |                  |                   |                   |
|----------------------------------------|-------------------|---------------------|--------------------|-------------------|--------------------|--------------------|------------------|--------------------|--------------------|------------------|------------------|------------------|------------------|------------------|------------------|------------------|--------------------|-------------------|------------------|-------------------|-------------------|
| 3 Family history of diabetes (%)       | NA                | NA                  | NA                 | 85 (15)           | 161 (18)           | 246 (17)           | 53 (15)          | 134 (17)           | 187 (16)           | 24 (2.3)         | 12 (1.2)         | 36 (1.7)         | 12 (1.3)         | 10 (0.9)         | 22 (1.1)         | 112 (13)         | 213 (20)           | 325 (17)          | 286 (6.0)        | 530 (9.0)         | 816 (7.6)         |
| 5 Body mass index (kg/m <sup>2</sup> ) | 24.2 (20.6-28.5)  | 32.9 (28.5-37.6)    | 28.4 (23-33.9)     | 23 (20.3-26.6)    | 28.6 (24.1-33.2)   | 26 (22.1-31.3)     | 20.6 (18.9-24.1) | 30.1 (25.3-35.9)   | 26.9 (21.1-33.1)   | 21.1 (19.2-23.4) | 19.8 (18.1-21.6) | 20.4 (18.6-22.6) | 20.6 (19-22.3)   | 21.4 (19.6-23.9) | 21 (19.3-23.1)   | 22.2 (20-25)     | 26.9 (23-31.7)     | 24.4 (21.1-28.6)  | 21.7 (19.5-24.9) | 25.5 (20.8-31.9)  | 23.2 (20.1-28.6)  |
| 8 Hip circumference (cm)               | 97.4 (90.0-105.3) | 117.5 (109.0-127.0) | 107.0 (95.7-118.5) | 94.0 (89.0-102.0) | 105.0 (97.0-113.0) | 100.0 (93.0-110.0) | 87.6 (83.3-94.9) | 108.7 (98.5-118.9) | 101.9 (90.1-114.3) | 89.5 (85.6-94.9) | 87.8 (83.4-92.5) | 88.8 (84.5-93.7) | 83.0 (79.0-88.0) | 88.0 (83.0-94.0) | 86.0 (81.0-91.0) | 93.0 (87.4-98.9) | 101.0 (94.0-110.0) | 97.0 (90.0-104.6) | 90.6 (85.0-98.0) | 99.0 (89.0-112.0) | 94.2 (86.6-105.3) |
| 11 Subcutaneous fat (cm)               | 1.4 (0.9-2.0)     | .1 (2.5-3.9)        | 2.2 (1.3-3.2)      | 1.2 (0.7-1.7)     | 2.2 (1.5-3.0)      | 1.7 (1.1-2.7)      | 0.8 (0.5-1.2)    | 2.2 (1.6-2.9)      | 1.7 (0.9-2.6)      | 0.8 (0.6-1.2)    | 0.9 (0.6-1.2)    | 0.9 (0.6-1.2)    | 0.7 (0.5-0.9)    | 1.0 (0.7-1.5)    | 0.8 (0.6-1.2)    | 1.0 (0.7-1.5)    | 2.0 (1.4-2.4)      | 1.5 (1.0-2.1)     | 0.9 (0.6-1.4)    | 1.7 (1.0-2.6)     | 1.2 (0.8-2.1)     |
| 14 Visceral fat (cm)                   | 6.2 (5-7.8)       | 4.7 (3.5-5.9)       | 5.5 (4.2-6.9)      | 6.3 (5.2-7.8)     | 5.9 (4.2-7.3)      | 6.1 (4.6-7.5)      | 5.9 (4.7-7.4)    | 6.7 (4.9-8.5)      | 6.4 (4.9-8.2)      | 4.3 (3.5-5.2)    | 4.3 (3.6-5.1)    | 4.3 (3.5-5.1)    | 4 (3.3-4.8)      | 3.3 (2.8-4.1)    | 3.6 (3-4.5)      | 5 (3.9-6.3)      | 4.6 (3.6-5.8)      | 4.8 (3.7-6)       | 5 (3.9-6.5)      | 4.5 (3.4-6)       | 4.7 (3.6-6.2)     |
| 17 Physical activity categories (%)    |                   |                     |                    |                   |                    |                    |                  |                    |                    |                  |                  |                  |                  |                  |                  |                  |                    |                   |                  |                   |                   |
| 18 Absent                              | 63 (6.2)          | 167 (17)            | 230 (11)           | 106 (19)          | 143 (16)           | 249 (17)           | 3 (0.9)          | 8 (1)              | 11 (1.3)           | 227 (22)         | 110 (11)         | 337 (16)         | 64 (7.1)         | 154 (14)         | 218 (11)         | 6 (0.7)          | 19 (1.8)           | 25 (1.3)          | 469 (9.8)        | 601 (10)          | 1,070 (10)        |
| 20 Sufficient                          | 134 (13)          | 283 (28)            | 417 (21)           | 21 (3.7)          | 58 (6.5)           | 79 (5.4)           | 16 (4.5)         | 27 (3.3)           | 134 (6.9)          | 37 (3.5)         | 34 (3.3)         | 71 (3.4)         | 35 (3.9)         | 59 (5.4)         | 94 (4.7)         | 41 (4.6)         | 93 (8.8)           | 134 (6.9)         | 284 (5.9)        | 554 (9.4)         | 838 (7.9)         |
| 22 Sufficient                          | 828 (81)          | 552 (55)            | 1,380 (68)         | 443 (78)          | 686 (77)           | 1,129 (78)         | 334 (95)         | 776 (96)           | 1,780 (92)         | 781 (75)         | 895 (86)         | 1,676 (80)       | 807 (89)         | 874 (80)         | 1,681 (84)       | 839 (95)         | 941 (89)           | 1,780 (92)        | 4,032 (84)       | 4,724 (80)        | 8,756 (82)        |

24 Continuous variables are summarised as medians and interquartile ranges and categorical variables as n (%); NA-not applicable

25

26

27

28

29

30

31

32

33

34

35

36

37

38

39

40

41

42

43

44

45

46

### Missing Outcome Data

No participants had missing data on the diabetes status outcome, while 31 individuals had missing data on the awareness outcome and were slightly older (median age 54 vs 52 years;  $p=0.035$ ), less likely to be employed (32 vs 64%;  $p=0.001$ ) and had a different marital status distribution ( $p=0.005$ ) than those who were not missing these data.

### Diabetes Cascade of Care

The diabetes cascade of care is shown in Figure 1. The age-adjusted prevalence of diabetes in study participants was 5.5% (95%CI 4.4-6.5%) and was significantly higher in women (6.1% vs 4.9%;  $p=0.004$ ). Prevalence varied by site, with highest prevalence in the urban site of Soweto (9.0%; 95%CI 7.8-10%) and the lowest in rural Navrongo (1.3%; 95%CI 0.7-1.9%) (Supplemental Table S1). Diabetes prevalence was higher in women than men in Soweto and Nairobi (Soweto: 12% vs 6.3%,  $p<0.001$ ; Nairobi: 9.1% vs 4.1%,  $p<0.001$ ) while in Nanoro, the prevalence was higher in men (1.8% vs 4.7%,  $p<0.001$ ).

Overall, just over half of the 613 individuals with diabetes were aware of their condition (54%; 95%CI 50-58%), with the highest awareness in Navrongo (65%; 95%CI 43-84%) and the lowest in Nanoro (25%; 95%CI 16-37%), although confidence intervals across the sites were wide and overlapping. Nearly 75% of individuals aware of having diabetes reported receiving treatment, but only 38% (95%CI 30-41%) were adequately controlled. More women reported being treated for diabetes ( $p=0.013$ ), but there were no sex differences in participants achieving control ( $p=0.978$ ).

1  
2  
3  
4  
5  
6 In logistic regression models, older age (odds ratio [OR] 1.1; 95%CI 1.0-1.1;  
7  
8  $p < 0.001$ ) and urban residence (OR 2.3; 95%CI 1.6-3.5;  $p < 0.001$ ) were associated  
9  
10 with higher odds of having diabetes (Table 2). Hypertension was also associated  
11  
12 with having diabetes (OR 1.9; 95%CI 1.5-2.4;  $p < 0.001$ ), as was family history of  
13  
14 diabetes (OR 3.9; 95%CI 3.0-5.1;  $p < 0.001$ ); conversely, HIV was associated with  
15  
16 lower odds of diabetes (OR 0.6; 95%CI 0.4-0.9;  $p < 0.001$ ). Visceral and  
17  
18 subcutaneous fat were also associated with higher odds, while there was a marginal  
19  
20 negative association with hip circumference.  
21  
22

23  
24  
25  
26 Similar associations were evident in sensitivity analyses restricted to sites with high  
27  
28 HIV prevalence (Supplemental Table S2). However, only family history remained  
29  
30 significantly associated with diabetes in low HIV prevalence settings, although  
31  
32 previously unobserved associations with male sex and physical activity emerged  
33  
34 (Supplemental Table S3). These analyses were however limited by the low  
35  
36 prevalence of diabetes in these settings which meant they were underpowered.  
37  
38  
39

40  
41  
42 Older age (OR 1.1; 95%CI 1.0-1.1;  $p = 0.019$ ), semi-rural environment (OR 2.5;  
43  
44 95%CI 1.1-5.7;  $p = 0.022$ ) and secondary education (OR 2.4; 95%CI 1.2-4.9;  
45  
46  $p = 0.015$ ) were all associated with greater likelihood of awareness of diabetes, as  
47  
48 were the chronic conditions hypertension (OR 1.6; 95%CI 1.0-2.4;  $p = 0.039$ ) and HIV  
49  
50 (OR 2.3; 95%CI 1.2-4.4;  $p = 0.017$ ) (Table 3). In sensitivity analyses in high HIV  
51  
52 prevalence sites, only hypertension and HIV remained associated with higher  
53  
54 awareness of diabetes (Supplemental Table S4). The sample size in low HIV  
55  
56 prevalence sites was too small to perform meaningful analyses.  
57  
58  
59  
60

Table 2. Factors associated with odds of having diabetes in five sub-Saharan African sites (Agincourt, Dikgale, Nairobi, Nanoro & Navrongo)<sup>1</sup>

|                                     | Odds Ratio | 95% confidence interval | p value |
|-------------------------------------|------------|-------------------------|---------|
| Age                                 | 1.1        | 1.0-1.1                 | <0.001  |
| <b>Sex</b>                          |            |                         |         |
| Women                               | reference  |                         |         |
| Men                                 | 1.1        | 0.8-1.5                 | 0.649   |
| <b>Location</b>                     |            |                         |         |
| Rural                               | reference  |                         |         |
| Semi-rural                          | 1.5        | 1.0-2.3                 | 0.077   |
| Urban                               | 2.3        | 1.6-3.5                 | <0.001  |
| <b>Marital status</b>               |            |                         |         |
| Currently married or cohabitating   | reference  |                         |         |
| Never married or cohabitating       | 1.4        | 0.9-2.0                 | 0.152   |
| Previously married                  | 1.0        | 0.8-1.3                 | 0.991   |
| <b>Educational attainment</b>       |            |                         |         |
| No formal education                 | reference  |                         |         |
| Primary education                   | 1.2        | 0.9-1.7                 | 0.293   |
| Secondary education                 | 1.0        | 0.7-1.5                 | 0.840   |
| Tertiary education                  | 1.4        | 0.7-2.6                 | 0.372   |
| <b>Employment status</b>            |            |                         |         |
| Unemployed                          | reference  |                         |         |
| Employed                            | 1.1        | 0.8-1.5                 | 0.480   |
| <b>Smoking status</b>               |            |                         |         |
| No history of smoking               | reference  |                         |         |
| Current smoker                      | 0.7        | 0.4-1.1                 | 0.151   |
| <b>History of hypertension</b>      |            |                         |         |
| No                                  | reference  |                         |         |
| Yes                                 | 1.9        | 1.5-2.4                 | <0.001  |
| <b>HIV status</b>                   |            |                         |         |
| Negative                            | reference  |                         |         |
| Positive                            | 0.6        | 0.4-0.9                 | 0.009   |
| <b>Family history of diabetes</b>   |            |                         |         |
| No                                  | reference  |                         |         |
| Yes                                 | 3.9        | 3.0-5.1                 | <0.001  |
| <b>Physical activity categories</b> |            |                         |         |
| Absent                              | reference  |                         |         |
| Insufficient                        | 0.9        | 0.5-1.5                 | 0.610   |
| Sufficient                          | 0.7        | 0.5-1.0                 | 0.078   |
| Hip circumference                   | 1.0        | 1.0-1.0                 | 0.044   |
| Visceral fat                        | 1.2        | 1.1-1.2                 | <0.001  |
| Subcutaneous fat                    | 1.3        | 1.1-1.4                 | <0.001  |

<sup>1</sup>7,425 participants were included in the analysis. Participants from the Soweto site were excluded as data on family history were not collected

Table 3. Factors associated with awareness of diabetes in six sub-Saharan African sites (Agincourt, Dikgale, Nairobi, Nanoro, Navrongo & Soweto)<sup>1</sup>

|                                   | Odds Ratio | 95% confidence interval | p value |
|-----------------------------------|------------|-------------------------|---------|
| Age                               | 1.0        | 1.0-1.1                 | 0.019   |
| <b>Sex</b>                        |            |                         |         |
| Women                             | reference  |                         |         |
| Men                               | 1.1        | 0.7-1.8                 | 0.586   |
| <b>Location</b>                   |            |                         |         |
| Rural                             | reference  |                         |         |
| Semi-rural                        | 2.5        | 1.1-5.7                 | 0.022   |
| Urban                             | 1.5        | 0.7-3.1                 | 0.345   |
| <b>Marital status</b>             |            |                         |         |
| Currently married or cohabitating | reference  |                         |         |
| Never married or cohabitating     | 0.9        | 0.4-2.0                 | 0.844   |
| Previously married                | 1.0        | 0.6-1.7                 | 0.863   |
| <b>Educational attainment</b>     |            |                         |         |
| No formal education               | reference  |                         |         |
| Primary education                 | 1.8        | 0.9-3.5                 | 0.086   |
| Secondary education               | 2.4        | 1.2-4.9                 | 0.015   |
| Tertiary education                | 2.1        | 0.7-6.1                 | 0.168   |
| <b>Employment status</b>          |            |                         |         |
| Unemployed                        | reference  |                         |         |
| Employed                          | 0.8        | 0.5-1.3                 | 0.449   |
| <b>History of hypertension</b>    |            |                         |         |
| No                                |            |                         |         |
| Yes                               | 1.6        | 1.0-2.4                 | 0.039   |
| <b>HIV status</b>                 |            |                         |         |
| Negative                          | reference  |                         |         |
| Positive                          | 2.3        | 1.2-4.4                 | 0.017   |
| Body mass index                   | 1.0        | 1.0-1.0                 | 0.968   |

<sup>1</sup>472 participants were included in the analysis

## DISCUSSION

In this multi-country study of the diabetes care cascade in SSA, we demonstrate attrition at each stage of the cascade with just over half of those with diabetes being aware of their condition and only approximately a third of those who reported treatment achieving optimal glycaemic control.

Our prevalence estimate of 5.5% is similar to the 2019 International Diabetes Federation (IDF) estimate for SSA of 4.7% in adults aged 20-79 years.[1] A sub-

1  
2  
3 regional meta-analysis from western Africa revealed a lower prevalence (4.0% in  
4 urban adults and 2.6% in rural adults),[13] in keeping with our study where  
5 prevalence in the western African sites was two to three times lower than in the  
6 southern and eastern African sites. Factors in our study associated with higher odds  
7 of having diabetes, such as age and urban residence, have been previously  
8 reported, with the western African meta-analysis reporting over a threefold increase  
9 in prevalence in people over 50 years[13] and Werfalli et al. reporting a prevalence  
10 of 20% in people living in urban areas vs 7.9% in those in rural areas.[14] Our  
11 findings of associations with family history of diabetes, hypertension and adiposity  
12 support results from other country-level meta-analyses in Africa.[15,16] We also  
13 noted lower odds of having diabetes in individuals with HIV in keeping with other  
14 studies that have identified lower prevalence of cardiometabolic risk factors in  
15 individuals with HIV in SSA.[17,18]

16  
17  
18  
19  
20  
21  
22  
23  
24  
25  
26  
27  
28  
29  
30  
31  
32  
33  
34  
35 While our estimate of the prevalence of diabetes unawareness of 47% was broadly  
36 similar to the 2019 IDF estimate of the prevalence of undiagnosed diabetes of 60%  
37 in SSA,[1] it did contrast sharply with other studies. A meta-analysis of 23 studies  
38 from across Africa estimated a much lower pooled prevalence of undiagnosed  
39 diabetes of just under 4%.[19] There was however significant heterogeneity in the  
40 included studies and the majority of the data originated from a single country, which  
41 may not be representative of other countries in the region. This itself differed  
42 considerably from data from 12 nationally representative surveys in SSA in which  
43 73% of those with diabetes were unaware of their condition, with factors similar to  
44 our study, namely older age and higher level of educational attainment, associated  
45 with awareness.[20]



1  
2  
3  
4  
5 Comparison of our results with a previous meta-analysis from SSA which reported  
6 approximately 11% of individuals with diabetes receiving treatment with insulin and  
7  
8 25% receiving oral hypoglycaemic agents is limited as different denominators were  
9  
10 used.[20] A country-level meta-analysis of 22 studies from Ethiopia suggested a  
11  
12 similar degree of glycaemic control as our study, with approximately a third of those  
13  
14 included achieving glycaemic targets, regardless of whether these were assessed  
15  
16 using fasting plasma glucose or glycosylated haemoglobin (HbA<sub>1c</sub>).[21]  
17  
18  
19  
20  
21  
22

23  
24 We describe, to our knowledge, the first study in SSA in which harmonised primary  
25  
26 data on the diabetes care cascade have been collected from multiple countries.  
27

28 Previous multi-country research in SSA on this subject has relied on systematic  
29  
30 reviews and meta-analyses and has therefore been limited by the methodological  
31  
32 heterogeneity of the constituent studies. In our work, data were collected in a  
33  
34 standardised manner and in addition to self-report, we used venous blood samples,  
35  
36 analysed at a single laboratory, to ascertain biochemical evidence of diabetes. Our  
37  
38 study also included over 10,000 men and women from three sub-regions of SSA and  
39  
40 therefore allows comparison between sub-regions as well as overall estimates.  
41  
42  
43  
44  
45

46  
47 Our study does have limitations. We did not distinguish between type 1 and type 2  
48  
49 diabetes and the care cascade and associated factors may differ between these two  
50  
51 conditions. While we used accepted and convenient diagnostic criteria for diabetes,  
52  
53 we may have underestimated the prevalence of diabetes as we did not assess  
54  
55 glucose tolerance and may therefore have excluded those who met the criteria for  
56  
57 diabetes only after a glucose load, which may be particularly important in populations  
58  
59  
60

1  
2  
3 of African descent. Both oral glucose tolerance tests and HbA<sub>1c</sub>, appear to classify  
4 more African-ancestry individuals as having diabetes than FPG alone [22, 23] and  
5 use of either of these criteria may have increased diabetes prevalence in our study.  
6  
7 Our research was conducted in HDSS sites and among a research cohort in Soweto,  
8 populations which may not be nationally representative. Indeed, previous studies in  
9 these sites may have increased awareness of diabetes beyond that in the general  
10 population. We also used self-report rather than clinical records to determine  
11 diabetes treatment. Fasting plasma glucose was used to assess diabetes control  
12 and this provides an evaluation only at a single point in time and may be subject to  
13 more analytic variability than HbA<sub>1c</sub>, which has largely supplanted it in clinical use in  
14 well-resourced environments.  
15  
16  
17  
18  
19  
20  
21  
22  
23  
24  
25  
26  
27  
28  
29  
30

31 Despite these limitations, our study provides valuable information on the burden of  
32 diabetes in SSA and the deficiencies which need to be addressed to improve  
33 outcomes. In areas where diabetes prevalence is low, primordial prevention  
34 strategies should be employed to reduce the likelihood of developing risk factors  
35 such as obesity, with particular focus on higher risk urban environments. Screening  
36 of at-risk populations needs to be enhanced and the low percentage of individuals  
37 attaining satisfactory glycaemic control suggests that more aggressive, treat to target  
38 strategies need to be promoted among health care workers, although we  
39 acknowledge this may be limited by drug availability in many parts of the continent.  
40  
41  
42  
43  
44  
45  
46  
47  
48  
49  
50  
51  
52  
53

54 Additional work is necessary to understand whether our findings are applicable to  
55 other SSA countries and sub-regions at different stages of the epidemiological  
56 transition and with variable access to health care. It is also essential to understand  
57  
58  
59  
60

1  
2  
3 key determinants of diabetes treatment and control, which we were underpowered to  
4  
5 investigate, and care cascades for other important vascular risk factors in people  
6  
7 with diabetes, such as elevated blood pressure and dyslipidaemia. Identification of  
8  
9 the points in each of these care cascades at which significant attrition is occurring  
10  
11 will assist public health officials in developing appropriate interventions to reduce  
12  
13 diabetes-related morbidity and mortality.  
14  
15  
16  
17  
18  
19  
20  
21  
22  
23  
24  
25  
26  
27  
28  
29  
30  
31  
32  
33  
34  
35  
36  
37  
38  
39  
40  
41  
42  
43  
44  
45  
46  
47  
48  
49  
50  
51  
52  
53  
54  
55  
56  
57  
58  
59  
60

For peer review only

## ACKNOWLEDGEMENTS

Author contributions: ANW-conceptualisation, writing-original draft, review and editing, funding acquisition; IM-formal analysis, writing-review and editing; GoAg-data collection, investigation, writing-review and editing; GeAs-data collection, investigation, writing-review and editing; PRB-data collection, investigation, writing-review and editing, funding acquisition; SC-investigation, writing-review and editing; FXGO-data collection, investigation, writing-review and editing, funding acquisition; EM-investigation, writing-review and editing; LKM- investigation, writing-review and editing; SFM-investigation, writing-review and editing; EAN-data collection, investigation, writing-review and editing; SAN-conceptualisation, investigation, writing-review and editing; HS-data collection, investigation writing-review and editing; MR-conceptualisation, writing-review and editing, project administration, funding acquisition; NJC-conceptualisation, writing-review and editing, funding acquisition

ANW and MR had full access to all the data in the study and take responsibility for the integrity of the data. IM performed the data analysis and takes responsibility for its accuracy. All authors consent to the publication of this manuscript and agree to be accountable for all aspects of this work.

Funding sources: The AWI-Gen Collaborative Centre is funded by the National Human Genome Research Institute (NHGRI), Office of the Director (OD), the Eunice Kennedy Shriver National Institute of Child Health & Human Development (NICHD), the National Institute of Environmental Health Sciences (NIEHS), the Office of AIDS Research (OAR) and the National Institute of Diabetes and Digestive and Kidney

1  
2  
3 Diseases (NIDDK) of the National Institutes of Health (NIH) [grant number  
4 U54HG006938 and its supplements], as part of the H3Africa Consortium as well as  
5  
6 by the Department of Science and Innovation, South Africa [grant number DST/CON  
7  
8 0056/2014].  
9  
10  
11  
12

13  
14 Funding for the Soweto site was also received from the South African Medical  
15  
16 Research Council.  
17  
18

19  
20  
21 ANW is supported by the Fogarty International Centre, National Institutes of Health  
22  
23 [grant number K43TW010698].  
24  
25  
26

27  
28 This paper describes the views of the authors and does not necessarily represent  
29  
30 the official views of the National Institutes of Health (USA) or the South African  
31  
32 Department of Science and Innovation who funded this research. The funders had  
33  
34 no role in study design, data collection, analysis and interpretation, report writing or  
35  
36 the decision to submit this article for publication.  
37  
38  
39

40  
41  
42 Conflict of interest disclosures: ANW declares an honorarium received from Sanofi  
43  
44 for serving as a panel member at an educational event on thyroid cancer. SAN  
45  
46 declares participation in a data safety monitoring board of a Phase IV open-label trial  
47  
48 to assess bone mineral density in a cohort of African women on Depo-Provera and  
49  
50 tenofovir disoproxil fumarate switched to tenofovir alafenamide fumarate based anti-  
51  
52 retroviral therapy and Council membership in the International Society of  
53  
54 Developmental Origins of Health and Disease.  
55  
56  
57  
58  
59  
60

1  
2  
3 Data statement: De-identified individual participant data from the AWI-Gen study are  
4 available from the European Genome-Phenome Archive (EGA) at study number  
5  
6 EGA00001002482 [[https://ega459 archive.org/datasets/EGAD00001006425](https://ega459.archive.org/datasets/EGAD00001006425)].  
7  
8  
9  
10  
11  
12  
13  
14  
15  
16  
17  
18  
19  
20  
21  
22  
23  
24  
25  
26  
27  
28  
29  
30  
31  
32  
33  
34  
35  
36  
37  
38  
39  
40  
41  
42  
43  
44  
45  
46  
47  
48  
49  
50  
51  
52  
53  
54  
55  
56  
57  
58  
59  
60

For peer review only

## REFERENCES

1. International Diabetes Federation. IDF Diabetes Atlas, 9th edn. Brussels, Belgium, 2019.
2. Kazemian P, Shebl FM, McCann N, Walensky RP, Wexler DJ. Evaluation of the cascade of diabetes care in the United States, 2005-2016. *JAMA Intern Med.* 2019;179:1376–1385. doi: 10.1001/jamainternmed.2019.2396.
3. Ramsay M, Crowther N, Tambo E, et al. H3Africa AWI-Gen Collaborative Centre: a resource to study the interplay between genomic and environmental risk factors for cardiometabolic diseases in four sub-Saharan African countries. *Glob Health Epidemiol Genom.* 2016;1:e20. doi: 10.1017/gheg.2016.17.
4. Ali SA, Soo C, Agongo G, et al. Genomic and environmental risk factors for cardiometabolic diseases in Africa: methods used for Phase 1 of the AWI-Gen population cross-sectional study. *Glob Health Action.* 2018;11(Suppl 2):1507133. doi: 10.1080/16549716.2018.1507133.
5. Jaff NG, Norris SA, Snyman T, Toman M, Crowther NJ. Body composition in the Study of Women Entering and in Endocrine Transition (SWEET): a perspective of African women who have a high prevalence of obesity and HIV infection. *Metabolism.* 2015;64:1031–1041. doi:10.1016/j.metabol.2015.05.009
6. Richter L, Norris S, Pettifor J, Yach D, Cameron N. Cohort profile: Mandela's children: the 1990 Birth to Twenty study in South Africa. *Int J Epidemiol.* 2007;36:504–511. doi: 10.1093/ije/dym016
7. World Health Organisation. Global Physical Activity Questionnaire analysis guide. <https://www.who.int/ncds/surveillance/steps/GPAQ/en/> (accessed October 30, 2020).
8. American Diabetes Association. Standards of medical care in diabetes-2021. *Diabetes Care.* 2021;44(Suppl 1):S73–S84.
9. United Nations Department of Economic and Social Affairs. World Population Prospects 2019. <https://population.un.org/wpp/DataQuery/> (accessed June 29, 2021).
10. Tiwari RC, Clegg LX, Zou Z. Efficient interval estimation for age-adjusted cancer rates. *Stat Methods Med Res.* 2006;15:547–569. doi: 10.1177/0962280206070621
11. Mbanya JC, Motala AA, Sobngwi E, Assah FK, Enoru ST. Diabetes in sub-Saharan Africa. *Lancet.* 2010;375:2254–2266. doi: 10.1016/S0140-6736(10)60550-8
12. Pinchevsky Y, Butkow N, Raal FJ, Chirwa T, Rothberg A. Demographic and clinical factors associated with development of type 2 diabetes: a review of the literature. *Int J Gen Med.* 2020;13:121–129. doi: 10.2147/IJGM.S226010
13. Abubakari AR, Lauder W, Jones MC, Kirk A, Agyemang C, Bhopal RS. Prevalence and time trends in diabetes and physical inactivity among adult West African populations: the epidemic has arrived. *Public Health.* 2009;123:602–614. doi: 10.1016/j.puhe.2009.07.009
14. Werfalli M, Engel ME, Musekiwa A, Kengne AP, Levitt NS. The prevalence of type 2 diabetes among older people in Africa: a systematic review. *Lancet Diabetes Endocrinol.* 2016;4:72–84. doi: 10.1016/S2213-8587(15)00363-0

15. Bigna JJ, Nansseu JR, Katte JC, Noubiap JJ. Prevalence of prediabetes and diabetes mellitus among adults residing in Cameroon: a systematic review and meta-analysis. *Diabetes Res Clin Pract.* 2018;137:109–118. doi: 10.1016/j.diabres.2017.12.005
16. Asamoah-Boaheng M, Sarfo-Kantanka O, Tuffour AB, Eghan B, Mbanya JC. Prevalence and risk factors for diabetes mellitus among adults in Ghana: a systematic review and meta-analysis. *Int Health.* 2019;11:83–92. doi: 10.1093/inthealth/ihy067
17. Gaziano TA, Abrahams-Gessel S, Gomez-Olive FX, et al. Cardiometabolic risk in a population of older adults with multiple co-morbidities in rural South Africa: the HAALSI (Health and Aging in Africa: Longitudinal Studies of INDEPTH communities) study. *BMC Public Health.* 2017;17:206. doi: 10.1186/s12889-017-4117-y
18. Nonterah EA, Boua PR, Klipstein-Grobusch K, et al. Classical cardiovascular risk factors and HIV are associated with carotid intima-media thickness in adults from sub-Saharan Africa: findings from H3Africa AWI-Gen study. *J Am Heart Assoc.* 2019;8:e011506. doi: 10.1161/JAHA.118.011506
19. Dessie G, Mulugeta H, Amare D, et al. A systematic analysis on prevalence and sub-regional distribution of undiagnosed diabetes mellitus among adults in African countries. *J Diabetes Metab Disord.* 2020;19:1931–1941. doi: 10.1007/s40200-020-00635-9
20. Manne-Goehler J, Atun R, Stokes A, et al. Diabetes diagnosis and care in sub-Saharan Africa: pooled analysis of individual data from 12 countries. *Lancet Diabetes Endocrinol.* 2016;4:903–912. doi: 10.1016/S2213-8587(16)30181-4
21. Gebreyohannes EA, Netere AK, Belachew SA. Glycemic control among diabetic patients in Ethiopia: a systematic review and meta-analysis. *PLoS One.* 2019;14:e0221790. doi: 10.1371/journal.pone.0221790
22. Jagannathan R, DuBose CW, Mabundo LS, et al. The OGTT is highly reproducible in Africans for the diagnosis of diabetes: implications for treatment and protocol design. *Diabetes Res Clin Pract.* 2020;170:108523. doi: 10.1016/j.diabres.2020.108523
23. Wade AN, Crowther NJ, Abrahams-Gessel S, et al. Concordance between fasting plasma glucose and HbA1c in the diagnosis of diabetes in black South African adults: a cross-sectional study. *BMJ Open.* 2021;11:e046060. doi: 10.1136/bmjopen-2020-046060



1  
2  
3 Figure 1. Diabetes cascade of care in six sub-Saharan African countries, overall and  
4 stratified by gender  
5  
6

7  
8 Estimates given as counts and proportions with 95% confidence intervals and  
9 proportions calculated as percentages of eligible individuals in previous stage.  
10  
11

12 Numbers for treatment prevalence and control exclude Soweto as these data were  
13 not collected at that site and calculations of proportions at these stages therefore  
14 also exclude this site from the denominator. Data on diabetes control were missing  
15 for a further 17 participants.  
16  
17  
18  
19  
20  
21  
22  
23  
24  
25  
26  
27  
28  
29  
30  
31  
32  
33  
34  
35  
36  
37  
38  
39  
40  
41  
42  
43  
44  
45  
46  
47  
48  
49  
50  
51  
52  
53  
54  
55  
56  
57  
58  
59  
60



139x101mm (600 x 600 DPI)

**Supplemental material**

Supplemental Table S1. Diabetes care cascade by study site

Supplemental Table S2. Factors associated with odds of having diabetes across three sub-Saharan African sites with high HIV prevalence (Agincourt, Dikgale & Nairobi)

Supplemental Table S3. Factors associated with odds of having diabetes across two sub-Saharan African sites with low HIV prevalence (Navrongo & Nanoro)

Supplemental Table S4. Factors associated with awareness in high HIV prevalence sites (Agincourt, Dikgale, Nairobi & Soweto)

For peer review only

**Table S1. Diabetes care cascade by study site**

|                                      | Soweto       |               |             |        | Agincourt     |               |               |       | Dikgale       |              |               |       | Nanoro        |               |               |        | Navrongo      |               |               |       | Nairobi       |               |              |        |
|--------------------------------------|--------------|---------------|-------------|--------|---------------|---------------|---------------|-------|---------------|--------------|---------------|-------|---------------|---------------|---------------|--------|---------------|---------------|---------------|-------|---------------|---------------|--------------|--------|
|                                      | T            | M             | W           | p      | T             | M             | W             | p     | T             | M            | W             | p     | T             | M             | W             | p      | T             | M             | W             | p     | T             | M             | W            | p      |
| Sample size                          | 2,027        | 1,025         | 1,002       |        | 1,465         | 573           | 892           |       | 1,168         | 356          | 812           |       | 2,084         | 1,045         | 1,039         |        | 2,014         | 923           | 1,091         |       | 1,942         | 886           | 1,056        |        |
| Diabetes present (n)                 | 191          | 72            | 119         |        | 92            | 40            | 52            |       | 105           | 28           | 77            |       | 71            | 50            | 21            |        | 23            | 11            | 12            |       | 131           | 37            | 94           |        |
| Crude diabetes prevalence (%)        | 9.4 (8.2-11) | 7.0 (5.5-8.8) | 12 (9.9-14) |        | 6.3 (5.1-7.6) | 7.0 (5.0-9.4) | 5.8 (4.4-7.6) |       | 9.0 (7.4-11)  | 7.9 (5.3-11) | 9.5 (7.6-12)  |       | 3.4 (2.7-4.3) | 4.8 (3.6-6.3) | 2.0 (1.3-3.1) |        | 1.1 (0.7-1.7) | 1.2 (0.6-2.1) | 1.1 (0.6-1.9) |       | 6.8 (5.7-8.0) | 4.2 (3.0-5.7) | 8.9 (7.3-11) |        |
| Age-adjusted diabetes prevalence (%) | 9.0 (7.8-10) | 6.3 (4.9-7.9) | 12 (9.7-14) | <0.001 | 5.3 (4.1-6.4) | 5.7 (4.0-8.1) | 5.0 (3.6-6.8) | 0.559 | 7.4 (6.0-8.9) | 7.2 (4.6-11) | 7.5 (5.8-9.6) | 0.857 | 3.3 (2.5-4.0) | 4.7 (3.5-6.3) | 1.8 (1.1-2.8) | <0.001 | 1.3 (0.7-1.9) | 1.3 (0.6-2.4) | 1.3 (0.6-2.5) | >0.99 | 6.7 (5.6-7.8) | 4.1 (2.9-5.7) | 9.1 (7.3-11) | <0.001 |
| Aware of having diabetes (n)         | 120          | 51            | 69          |        | 55            | 22            | 33            |       | 61            | 16           | 45            |       | 18            | 16            | 2             |        | 15            | 8             | 7             |       | 59            | 17            | 42           |        |
| Aware of having diabetes (%)         | 63 (56-70)   | 71 (59-81)    | 58 (49-67)  | 0.075  | 60 (49-70)    | 55 (39-71)    | 64 (50-76)    | 0.412 | 58 (48-68)    | 57 (37-76)   | 58 (47-70)    | 0.905 | 25 (16-37)    | 32 (20-47)    | 9.5 (1.2-30)  | 0.047  | 65 (43-84)    | 73 (39-94)    | 58 (28-85)    | 0.468 | 45 (36-54)    | 46 (30-63)    | 45 (34-55)   | 0.895  |
| Reporting treatment for diabetes (n) | NA           | NA            | NA          |        | 41            | 18            | 23            |       | 54            | 11           | 43            |       | 4             | 3             | 1             |        | 7             | 4             | 3             |       | 46            | 14            | 32           |        |
| Reporting treatment for diabetes (%) | NA           | NA            | NA          |        | 75 (61-85)    | 82 (60-95)    | 70 (51-84)    | 0.312 | 89 (78-95)    | 69 (41-89)   | 96 (85-100)   | 0.004 | 22 (6.4-48)   | 19 (4-46)     | 50 (1.3-99)   | 0.316  | 47 (21-73)    | 50 (16-84)    | 43 (9.9-82)   | 0.782 | 78 (65-88)    | 82 (57-96)    | 76 (61-88)   | 0.605  |
| Diabetes controlled (n)              | NA           | NA            | NA          |        | 13            | 5             | 8             |       | 25            | 4            | 21            |       | 2             | 1             | 1             |        | 4             | 3             | 1             |       | 14            | 6             | 8            |        |
| Diabetes controlled (%)              | NA           | NA            | NA          |        | 32 (18-48)    | 28 (9.7-54)   | 35 (16-57)    | 0.632 | 46 (33-60)    | 36 (11-69)   | 49 (33-65)    | 0.461 | 50 (6.8-93)   | 33 (0.8-91)   | 100 (-)       | 0.681  | 57 (18-90)    | 75 (19-99)    | 33 (0.8-91)   | 0.270 | 30 (18-46)    | 43 (18-71)    | 25 (12-43)   | 0.226  |

T: total, M:men, W:women; prevalences are given as estimates and 95% confidence intervals. p value for men vs women and calculated using chi-squared or Fisher's exact test. NA-not applicable as these data were not collected

**Table S2. Factors associated with odds of having diabetes across three sub-Saharan African sites with high HIV prevalence (Agincourt, Dikgale & Nairobi)<sup>1</sup>**

|                                     | Odds ratio | 95% confidence interval | p value |
|-------------------------------------|------------|-------------------------|---------|
| Age                                 | 1.1        | 1.0-1.1                 | <0.001  |
| <b>Sex</b>                          |            |                         |         |
| Women                               | reference  |                         |         |
| Men                                 | 0.8        | 0.5-1.2                 | 0.209   |
| <b>Marital status</b>               |            |                         |         |
| Currently married or cohabitating   | reference  |                         |         |
| Never married or cohabitating       | 1.2        | 0.8-1.8                 | 0.369   |
| Previously married                  | 1.0        | 0.8-1.4                 | 0.913   |
| <b>Educational attainment</b>       |            |                         |         |
| No formal education                 | reference  |                         |         |
| Primary education                   | 1.5        | 1.0-2.2                 | 0.074   |
| Secondary education                 | 1.2        | 0.8-1.9                 | 0.443   |
| Tertiary education                  | 1.2        | 0.6-2.6                 | 0.602   |
| <b>Employment status</b>            |            |                         |         |
| Unemployed                          | reference  |                         |         |
| Employed                            | 1.2        | 0.9-1.6                 | 0.188   |
| <b>Smoking status</b>               |            |                         |         |
| No history of smoking               | reference  |                         |         |
| Current smoker                      | 0.6        | 0.4-1.1                 | 0.084   |
| <b>History of hypertension</b>      |            |                         |         |
| No                                  | reference  |                         |         |
| Yes                                 | 2.0        | 1.5-2.6                 | <0.001  |
| <b>HIV status</b>                   |            |                         |         |
| Negative                            | reference  |                         |         |
| Positive                            | 0.5        | 0.4-0.8                 | 0.001   |
| <b>Family history of diabetes</b>   |            |                         |         |
| No                                  | reference  |                         |         |
| Yes                                 | 3.6        | 2.8-4.7                 | <0.001  |
| <b>Physical activity categories</b> |            |                         |         |
| Absent                              | reference  |                         |         |
| Insufficient                        | 1.4        | 0.7-3.0                 | 0.333   |
| Sufficient                          | 1.1        | 0.6-2.0                 | 0.729   |
| <b>Anthropometry</b>                |            |                         |         |
| Hip circumference                   | 1.0        | 1.0-1.0                 | 0.001   |
| Visceral fat                        | 1.2        | 1.1-1.2                 | <0.001  |
| Subcutaneous fat                    | 1.3        | 1.1-1.4                 | <0.001  |

<sup>1</sup>3929 participants were included in the analysis

**Table S3. Factors associated with odds of having diabetes across two sub-Saharan African sites with low HIV prevalence (Navrongo & Nanoro)<sup>1</sup>**

|                                     | Odds ratio | 95% confidence interval | p value |
|-------------------------------------|------------|-------------------------|---------|
| Age                                 | 1.0        | 1.0-1.1                 | 0.181   |
| <b>Sex</b>                          |            |                         |         |
| Women                               | reference  |                         |         |
| Men                                 | 1.9        | 1.1-3.3                 | 0.033   |
| <b>Marital status</b>               |            |                         |         |
| Currently married or cohabitating   | reference  |                         |         |
| Never married or cohabitating       | 1.8        | 0.2-14.2                | 0.580   |
| Previously married                  | 1.2        | 0.6-2.3                 | 0.682   |
| <b>Educational attainment</b>       |            |                         |         |
| No formal education                 | reference  |                         |         |
| Primary education                   | 0.5        | 0.2-1.2                 | 0.117   |
| Secondary education                 | 0.9        | 0.4-2.5                 | 0.906   |
| Tertiary education                  | 3.7        | 1.0-13.9                | 0.051   |
| <b>Employment status</b>            |            |                         |         |
| Unemployed                          | reference  |                         |         |
| Employed                            | 1.8        | 0.8-3.9                 | 0.134   |
| <b>Smoking status</b>               |            |                         |         |
| No history of smoking               | reference  |                         |         |
| Current smoker                      | 0.9        | 0.3-2.6                 | 0.793   |
| <b>History of hypertension</b>      |            |                         |         |
| No                                  | reference  |                         |         |
| Yes                                 | 1.2        | 0.7-2.1                 | 0.498   |
| <b>HIV status</b>                   |            |                         |         |
| Negative                            | reference  |                         |         |
| Positive                            | 1.7        | 0.2-13.5                | 0.628   |
| <b>Family history of diabetes</b>   |            |                         |         |
| No                                  | reference  |                         |         |
| Yes                                 | 10.4       | 4.3-25.4                | <0.001  |
| <b>Physical activity categories</b> |            |                         |         |
| Absent                              | reference  |                         |         |
| Insufficient                        | 0.5        | 0.1-1.7                 | 0.232   |
| Sufficient                          | 0.5        | 0.3-0.8                 | 0.009   |
| Hip circumference                   | 1.0        | 1.0-1.1                 | 0.023   |
| Visceral fat                        | 1.2        | 1.0-1.4                 | 0.140   |
| Subcutaneous fat                    | 1.1        | 0.7-1.9                 | 0.724   |

<sup>1</sup>3496 participants were included in the analysis

**Table S4. Factors associated with awareness in high HIV prevalence sites (Agincourt, Dikgale, Nairobi & Soweto)<sup>1</sup>**

|                                   | Odds Ratio | 95% confidence interval | p value |
|-----------------------------------|------------|-------------------------|---------|
| Age                               | 1.0        | 1.0-1.1                 | 0.094   |
| <b>Sex</b>                        |            |                         |         |
| Women                             | reference  |                         |         |
| Men                               | 1.0        | 0.6-1.6                 | 0.849   |
| <b>Marital status</b>             |            |                         |         |
| Currently married or cohabitating | reference  |                         |         |
| Never married or cohabitating     | 1.0        | 0.5-2.1                 | 0.933   |
| Previously married                | 0.9        | 0.5-1.4                 | 0.600   |
| <b>Educational attainment</b>     |            |                         |         |
| No formal education               | reference  |                         |         |
| Primary education                 | 1.1        | 0.5-2.3                 | 0.858   |
| Secondary education               | 1.4        | 0.7-3.2                 | 0.370   |
| Tertiary education                | 1.2        | 0.4-3.9                 | 0.790   |
| <b>Employment status</b>          |            |                         |         |
| Unemployed                        | reference  |                         |         |
| Employed                          | 0.8        | 0.5-1.2                 | 0.204   |
| <b>History of hypertension</b>    |            |                         |         |
| No                                | reference  |                         |         |
| Yes                               | 1.9        | 1.2-2.9                 | 0.008   |
| <b>HIV status</b>                 |            |                         |         |
| Negative                          | reference  |                         |         |
| Positive                          | 2.1        | 1.1-4.0                 | 0.034   |
| Body mass index                   | 1.0        | 0.9-1.0                 | 0.170   |

<sup>1</sup>397 participants were included in the analysis

STROBE Statement—Checklist of items that should be included in reports of *cross-sectional studies*

|                              | Item No | Recommendation                                                                                                                                                                                    | Page No          |
|------------------------------|---------|---------------------------------------------------------------------------------------------------------------------------------------------------------------------------------------------------|------------------|
| <b>Title and abstract</b>    | 1       | (a) Indicate the study's design with a commonly used term in the title or the abstract                                                                                                            | 3                |
|                              |         | (b) Provide in the abstract an informative and balanced summary of what was done and what was found                                                                                               | 3-4              |
| <b>Introduction</b>          |         |                                                                                                                                                                                                   |                  |
| Background/rationale         | 2       | Explain the scientific background and rationale for the investigation being reported                                                                                                              | 6-7              |
| Objectives                   | 3       | State specific objectives, including any prespecified hypotheses                                                                                                                                  | 7                |
| <b>Methods</b>               |         |                                                                                                                                                                                                   |                  |
| Study design                 | 4       | Present key elements of study design early in the paper                                                                                                                                           | 7-8              |
| Setting                      | 5       | Describe the setting, locations, and relevant dates, including periods of recruitment, exposure, follow-up, and data collection                                                                   | 7-8              |
| Participants                 | 6       | (a) Give the eligibility criteria, and the sources and methods of selection of participants                                                                                                       | 7-8              |
| Variables                    | 7       | Clearly define all outcomes, exposures, predictors, potential confounders, and effect modifiers. Give diagnostic criteria, if applicable                                                          | 8-10             |
| Data sources/<br>measurement | 8*      | For each variable of interest, give sources of data and details of methods of assessment (measurement). Describe comparability of assessment methods if there is more than one group              | 8-10             |
| Bias                         | 9       | Describe any efforts to address potential sources of bias                                                                                                                                         | 10-11            |
| Study size                   | 10      | Explain how the study size was arrived at                                                                                                                                                         | 7-8              |
| Quantitative variables       | 11      | Explain how quantitative variables were handled in the analyses. If applicable, describe which groupings were chosen and why                                                                      | 10-12            |
| Statistical methods          | 12      | (a) Describe all statistical methods, including those used to control for confounding                                                                                                             | 10-12            |
|                              |         | (b) Describe any methods used to examine subgroups and interactions                                                                                                                               | 10-12            |
|                              |         | (c) Explain how missing data were addressed                                                                                                                                                       | 12               |
|                              |         | (d) If applicable, describe analytical methods taking account of sampling strategy                                                                                                                | n/a              |
|                              |         | (e) Describe any sensitivity analyses                                                                                                                                                             | 11-12            |
| <b>Results</b>               |         |                                                                                                                                                                                                   |                  |
| Participants                 | 13*     | (a) Report numbers of individuals at each stage of study—eg numbers potentially eligible, examined for eligibility, confirmed eligible, included in the study, completing follow-up, and analysed | 12,15            |
|                              |         | (b) Give reasons for non-participation at each stage                                                                                                                                              | 15               |
|                              |         | (c) Consider use of a flow diagram                                                                                                                                                                |                  |
| Descriptive data             | 14*     | (a) Give characteristics of study participants (eg demographic, clinical, social) and information on exposures and potential confounders                                                          | 12-14            |
|                              |         | (b) Indicate number of participants with missing data for each variable of interest                                                                                                               | 13-15,<br>17, 18 |
| Outcome data                 | 15*     | Report numbers of outcome events or summary measures                                                                                                                                              | 15               |



1  
2  
3  
4  
5  
6  
7  
8  
9  
10  
11  
12  
13  
14  
15  
16  
17  
18  
19  
20  
21  
22  
23  
24  
25  
26  
27  
28  
29  
30  
31  
32  
33  
34  
35  
36  
37  
38  
39  
40  
41  
42  
43  
44  
45  
46  
47  
48  
49  
50  
51  
52  
53  
54  
55  
56  
57  
58  
59  
60

|                          |    |                                                                                                                                                                                                              |       |
|--------------------------|----|--------------------------------------------------------------------------------------------------------------------------------------------------------------------------------------------------------------|-------|
| Main results             | 16 | (a) Give unadjusted estimates and, if applicable, confounder-adjusted estimates and their precision (eg, 95% confidence interval). Make clear which confounders were adjusted for and why they were included | 16    |
|                          |    | (b) Report category boundaries when continuous variables were categorized                                                                                                                                    | n/a   |
|                          |    | (c) If relevant, consider translating estimates of relative risk into absolute risk for a meaningful time period                                                                                             | n/a   |
| Other analyses           | 17 | Report other analyses done—eg analyses of subgroups and interactions, and sensitivity analyses                                                                                                               | 16    |
| <b>Discussion</b>        |    |                                                                                                                                                                                                              |       |
| Key results              | 18 | Summarise key results with reference to study objectives                                                                                                                                                     | 18    |
| Limitations              | 19 | Discuss limitations of the study, taking into account sources of potential bias or imprecision. Discuss both direction and magnitude of any potential bias                                                   | 20-21 |
| Interpretation           | 20 | Give a cautious overall interpretation of results considering objectives, limitations, multiplicity of analyses, results from similar studies, and other relevant evidence                                   | 18-22 |
| Generalisability         | 21 | Discuss the generalisability (external validity) of the study results                                                                                                                                        | 21    |
| <b>Other information</b> |    |                                                                                                                                                                                                              |       |
| Funding                  | 22 | Give the source of funding and the role of the funders for the present study and, if applicable, for the original study on which the present article is based                                                | 23-24 |

\*Give information separately for exposed and unexposed groups.

**Note:** An Explanation and Elaboration article discusses each checklist item and gives methodological background and published examples of transparent reporting. The STROBE checklist is best used in conjunction with this article (freely available on the Web sites of PLoS Medicine at <http://www.plosmedicine.org/>, Annals of Internal Medicine at <http://www.annals.org/>, and Epidemiology at <http://www.epidem.com/>). Information on the STROBE Initiative is available at [www.strobe-statement.org](http://www.strobe-statement.org).

# BMJ Open

## Diabetes care cascade and associated factors in 10,700 middle-aged adults in four sub-Saharan African countries-a cross-sectional study

|                               |                                                                                                                                                                                                                                                                                                                                                                                                                                                                                                                                                                                                                                                                                                                                                                                                                                                                                                                                                                                                                                                                                                                                                                                                                                                                                                                                                                                                                                                                                                                                                                                                                                                                                                                                                                                                                                                                                                                                                                                                                                                                                                                                                                                                                                                                                                           |
|-------------------------------|-----------------------------------------------------------------------------------------------------------------------------------------------------------------------------------------------------------------------------------------------------------------------------------------------------------------------------------------------------------------------------------------------------------------------------------------------------------------------------------------------------------------------------------------------------------------------------------------------------------------------------------------------------------------------------------------------------------------------------------------------------------------------------------------------------------------------------------------------------------------------------------------------------------------------------------------------------------------------------------------------------------------------------------------------------------------------------------------------------------------------------------------------------------------------------------------------------------------------------------------------------------------------------------------------------------------------------------------------------------------------------------------------------------------------------------------------------------------------------------------------------------------------------------------------------------------------------------------------------------------------------------------------------------------------------------------------------------------------------------------------------------------------------------------------------------------------------------------------------------------------------------------------------------------------------------------------------------------------------------------------------------------------------------------------------------------------------------------------------------------------------------------------------------------------------------------------------------------------------------------------------------------------------------------------------------|
| Journal:                      | <i>BMJ Open</i>                                                                                                                                                                                                                                                                                                                                                                                                                                                                                                                                                                                                                                                                                                                                                                                                                                                                                                                                                                                                                                                                                                                                                                                                                                                                                                                                                                                                                                                                                                                                                                                                                                                                                                                                                                                                                                                                                                                                                                                                                                                                                                                                                                                                                                                                                           |
| Manuscript ID                 | bmjopen-2022-069193.R1                                                                                                                                                                                                                                                                                                                                                                                                                                                                                                                                                                                                                                                                                                                                                                                                                                                                                                                                                                                                                                                                                                                                                                                                                                                                                                                                                                                                                                                                                                                                                                                                                                                                                                                                                                                                                                                                                                                                                                                                                                                                                                                                                                                                                                                                                    |
| Article Type:                 | Original research                                                                                                                                                                                                                                                                                                                                                                                                                                                                                                                                                                                                                                                                                                                                                                                                                                                                                                                                                                                                                                                                                                                                                                                                                                                                                                                                                                                                                                                                                                                                                                                                                                                                                                                                                                                                                                                                                                                                                                                                                                                                                                                                                                                                                                                                                         |
| Date Submitted by the Author: | 28-Feb-2023                                                                                                                                                                                                                                                                                                                                                                                                                                                                                                                                                                                                                                                                                                                                                                                                                                                                                                                                                                                                                                                                                                                                                                                                                                                                                                                                                                                                                                                                                                                                                                                                                                                                                                                                                                                                                                                                                                                                                                                                                                                                                                                                                                                                                                                                                               |
| Complete List of Authors:     | <p>Wade, Alisha N.; University of the Witwatersrand Johannesburg Faculty of Health Sciences, MRC/Wits Rural Public Health and Health Transitions Research Unit, School of Public Health</p> <p>Maposa, Innocent; University of the Witwatersrand Johannesburg Faculty of Health Sciences, Division of Epidemiology and Biostatistics</p> <p>Agongo, Godfred; Navrongo Health Research Centre; C K Tedam University of Technology and Applied Sciences, Department of Biochemistry and Forensic Science, School of Chemical and Biochemical Sciences</p> <p>Asiki, G; African Population and Health Research Center, Health and Systems for Health Unit</p> <p>Boua, Palwende; Institut de Recherche en Sciences de la Sante, Clinical Research Unit of Nanoro</p> <p>Choma, Solomon SR; University of Limpopo, Department of Pathology and Medical Sciences, DIMAMO Population Health Research Centre</p> <p>Gómez-Olivé, F. Xavier; University of the Witwatersrand Johannesburg Faculty of Health Sciences, MRC/Wits Rural Public Health and Health Transitions Research Unit, School of Public Health</p> <p>Maimela, Eric; University of Limpopo, Department of Public Health</p> <p>Micklesfield, Lisa; University of the Witwatersrand Johannesburg Faculty of Health Sciences, South African MRC Developmental Pathways for Health Research Unit, School of Clinical Medicine</p> <p>Mohamed, Shukri; African Population and Health Research Center, Health and Systems for Health Unit</p> <p>Nonterah, Engelbert ; Navrongo Health Research Centre</p> <p>Norris, Shane; University of the Witwatersrand Johannesburg Faculty of Health Sciences, South African MRC Developmental Pathways for Health Research Unit, School of Clinical Medicine; University of Southampton, Global Health Research Institute, School of Health and Human Development</p> <p>Sorgho, Hermann ; Institut de Recherche en Sciences de la Sante, Clinical Research Unit of Nanoro</p> <p>Ramsay, Michele; University of the Witwatersrand Johannesburg Faculty of Health Sciences, Sydney Brenner Institute for Molecular Bioscience</p> <p>Crowther, Nigel John; University of the Witwatersrand Johannesburg Faculty of Health Sciences, Department of Chemical Pathology, National Health Laboratory Service</p> |
| <b>Primary Subject            | Diabetes and endocrinology                                                                                                                                                                                                                                                                                                                                                                                                                                                                                                                                                                                                                                                                                                                                                                                                                                                                                                                                                                                                                                                                                                                                                                                                                                                                                                                                                                                                                                                                                                                                                                                                                                                                                                                                                                                                                                                                                                                                                                                                                                                                                                                                                                                                                                                                                |

1  
2  
3  
4  
5  
6  
7  
8  
9  
10  
11  
12  
13  
14  
15  
16  
17  
18  
19  
20  
21  
22  
23  
24  
25  
26  
27  
28  
29  
30  
31  
32  
33  
34  
35  
36  
37  
38  
39  
40  
41  
42  
43  
44  
45  
46  
47  
48  
49  
50  
51  
52  
53  
54  
55  
56  
57  
58  
59  
60

|                            |                                                                                                                                         |
|----------------------------|-----------------------------------------------------------------------------------------------------------------------------------------|
| Heading                    |                                                                                                                                         |
| Secondary Subject Heading: | Global health                                                                                                                           |
| Keywords:                  | General diabetes < DIABETES & ENDOCRINOLOGY, PUBLIC HEALTH, International health services < HEALTH SERVICES ADMINISTRATION & MANAGEMENT |
|                            |                                                                                                                                         |





I, the Submitting Author has the right to grant and does grant on behalf of all authors of the Work (as defined in the below author licence), an exclusive licence and/or a non-exclusive licence for contributions from authors who are: i) UK Crown employees; ii) where BMJ has agreed a CC-BY licence shall apply, and/or iii) in accordance with the terms applicable for US Federal Government officers or employees acting as part of their official duties; on a worldwide, perpetual, irrevocable, royalty-free basis to BMJ Publishing Group Ltd ("BMJ") its licensees and where the relevant Journal is co-owned by BMJ to the co-owners of the Journal, to publish the Work in this journal and any other BMJ products and to exploit all rights, as set out in our [licence](#).

The Submitting Author accepts and understands that any supply made under these terms is made by BMJ to the Submitting Author unless you are acting as an employee on behalf of your employer or a postgraduate student of an affiliated institution which is paying any applicable article publishing charge ("APC") for Open Access articles. Where the Submitting Author wishes to make the Work available on an Open Access basis (and intends to pay the relevant APC), the terms of reuse of such Open Access shall be governed by a Creative Commons licence – details of these licences and which [Creative Commons](#) licence will apply to this Work are set out in our licence referred to above.

Other than as permitted in any relevant BMJ Author's Self Archiving Policies, I confirm this Work has not been accepted for publication elsewhere, is not being considered for publication elsewhere and does not duplicate material already published. I confirm all authors consent to publication of this Work and authorise the granting of this licence.

1  
2  
3 Full title: Diabetes care cascade and associated factors in 10,700 middle-aged adults  
4 in four sub-Saharan African countries - a cross-sectional study  
5  
6  
7  
8  
9

10 Running title: Diabetes care cascade in sub-Saharan Africa  
11  
12  
13  
14

15 Authors: Alisha N. Wade DPhil<sup>a</sup>, Innocent Maposa PhD<sup>b</sup>, Godfred Agongo PhD<sup>c,d</sup>,  
16 Gershim Asiki PhD<sup>e</sup>, Palwende Romuald Boua PhD<sup>f</sup>, Solomon Choma MSc<sup>g</sup>, F.  
17 Xavier Gómez-Olivé PhD<sup>a</sup>, Eric Maimela PhD<sup>h</sup>, Lisa K. Micklesfield PhD<sup>i</sup>, Shukri F.  
18 Mohamed PhD<sup>e</sup>, Engelbert A. Nonterah PhD<sup>c</sup>, Shane A. Norris PhD<sup>i,j</sup>, Hermann  
19 Sorgho PhD<sup>f</sup>, Michèle Ramsay PhD<sup>k</sup>, Nigel J. Crowther PhD<sup>l</sup> as members of AWI-  
20 Gen and the H3Africa Consortium  
21  
22  
23  
24  
25  
26  
27  
28  
29

30 Author affiliations: <sup>a</sup>MRC/Wits Rural Public Health and Health Transitions Research  
31 Unit, School of Public Health, Faculty of Health Sciences, University of the  
32 Witwatersrand, 27 St. Andrew's Road, Parktown, Johannesburg 2193, South Africa;  
33  
34 <sup>b</sup>Division of Epidemiology and Biostatistics, School of Public Health, Faculty of  
35 Health Sciences, University of the Witwatersrand, 27 St. Andrew's Road, Parktown,  
36 Johannesburg 2193, South Africa; <sup>c</sup>Navrongo Health Research Centre, Ghana  
37 Health Service, Post Office Box 114, Navrongo, Upper East Region, Ghana;  
38  
39 <sup>d</sup>Department of Biochemistry and Forensic Science, School of Chemical and  
40 Biochemical Sciences, C. K. Tedam University of Technology and Applied Sciences,  
41 Box 24 Navrongo, Ghana; <sup>e</sup>Health and Systems for Health Unit, P.O. Box 10787-  
42 00100, African Population and Health Research Centre, Nairobi, Kenya; <sup>f</sup>Clinical  
43 Research Unit of Nanoro, Institut de Recherche en Sciences de la Santé, Nanoro,  
44 Burkina Faso; <sup>g</sup>Department of Pathology and Medical Sciences, DIMAMO Population  
45 Health Research Centre, University of Limpopo, Private Bag X1106 Sovenga 0727,  
46  
47  
48  
49  
50  
51  
52  
53  
54  
55  
56  
57  
58  
59  
60

1  
2  
3 South Africa; <sup>h</sup>Department of Public Health, University of Limpopo, 1<sup>st</sup> University  
4 Road, Sovenga, 0727, South Africa; <sup>i</sup>South African MRC Developmental Pathways  
5 for Health Research Unit, School of Clinical Medicine, Faculty of Health Sciences,  
6 University of the Witwatersrand, 7 York Road, Parktown, Johannesburg 2193, South  
7 Africa; <sup>j</sup>Global Health Research Institute, School of Health and Human Development,  
8 University of Southampton, University Road, Southampton SO17 1BJ, United  
9 Kingdom; <sup>k</sup>Sydney Brenner Institute for Molecular Bioscience, Faculty of Health  
10 Sciences, University of the Witwatersrand, 9 Jubilee Road, Parktown, Johannesburg  
11 2193, South Africa; <sup>l</sup>Department of Chemical Pathology, National Health Laboratory  
12 Service, Faculty of Health Sciences, University of the Witwatersrand, 7 York Road,  
13 Parktown, Johannesburg 2193, South Africa

14  
15  
16  
17  
18  
19  
20  
21  
22  
23  
24  
25  
26  
27  
28  
29  
30  
31  
32 Corresponding author: Alisha N. Wade DPhil, MRC/Wits Rural Public Health and  
33 Health Transitions Research Unit, School of Public Health, University of the  
34 Witwatersrand, 27 St. Andrew's Road, Parktown, Johannesburg, 2193, South Africa.  
35  
36  
37  
38  
39 Tel:+27 11 717 2511; Fax:+27 86 765 2753; Email: alisha.wade@wits.ac.za  
40  
41  
42  
43  
44

45 Word counts:

46  
47  
48 Abstract: 277 words  
49

50  
51 Main text: 3715 words  
52  
53  
54  
55  
56  
57  
58  
59  
60

## Abstract

**Objectives:** We investigated progression through the care cascade and associated factors for people with diabetes in sub-Saharan Africa to identify attrition stages that may be most appropriate for targeted intervention.

**Design:** Cross-sectional study.

**Setting:** Community-based study in four sub-Saharan African countries.

**Participants:** 10 700 individuals, aged 40-60 years.

**Primary and secondary outcome measures:** The primary outcome measure was the diabetes cascade of care defined as the age-adjusted diabetes prevalence (self-report of diabetes, fasting plasma glucose [FPG]  $\geq 7$  mmol/l or random plasma glucose  $\geq 11.1$  mmol/l) and proportions of those who reported awareness of having diabetes, ever having received treatment for diabetes and those who achieved glycaemic control (FPG  $< 7.2$  mmol/l). Secondary outcome measures were factors associated with having diabetes and being aware of the diagnosis.

**Results:** Diabetes prevalence was 5.5% (95%CI 4.4-6.5%). Approximately half of those with diabetes were aware (54%; 95%CI 50-58%); 73% (95%CI 67-79%) of aware individuals reported ever having received treatment. However, only 38% (95%CI 30-46%) of those ever having received treatment were adequately controlled. Increasing age (OR 1.1; 95%CI 1.0-1.1), urban residence (OR 2.3; 95%CI 1.6-3.5), hypertension (OR 1.9; 95%CI 1.5-2.4), family history of diabetes (OR 3.9;

1  
2  
3 95%CI 3.0-5.1), and measures of central adiposity were associated with higher odds  
4  
5 of having diabetes. Increasing age (OR 1.1; 95%CI 1.0-1.1), semi-rural residence  
6  
7 (OR 2.5; 95%CI 1.1-5.7), secondary education (OR 2.4; 95%CI 1.2-4.9),  
8  
9 hypertension (OR 1.6; 95%CI 1.0-2.4), and known HIV positivity (OR 2.3; 95%CI 1.2-  
10  
11 4.4) were associated with greater likelihood of awareness of having diabetes.  
12  
13  
14  
15  
16

17 **Conclusions:** There is attrition at each stage of the diabetes care cascade in sub-  
18  
19 Saharan Africa. Public health strategies should target improving diagnosis in high-  
20  
21 risk individuals and intensifying therapy in individuals treated for diabetes.  
22  
23  
24  
25

26 **Keywords:** diabetes mellitus, sub-Saharan Africa  
27  
28  
29  
30  
31  
32  
33  
34  
35  
36  
37  
38  
39  
40  
41  
42  
43  
44  
45  
46  
47  
48  
49  
50  
51  
52  
53  
54  
55  
56  
57  
58  
59  
60



### Strength and limitations of this study

- We present harmonised primary data on the diabetes care cascade from multiple countries in sub-Saharan Africa
- Our study included over 10,000 participants from eastern, western and southern Africa
- We did not perform glucose tolerance testing and therefore may not have identified individuals who met criteria for diabetes diagnosis only after a glucose challenge
- Glycaemic control was assessed using fasting plasma glucose which provides a point evaluation and may not be reflective of control over a longer period of time

## INTRODUCTION

Diabetes prevalence in adults in sub-Saharan Africa (SSA) is projected to increase from 23.6 million in 2021 to 54.9 million people in 2045.[1] Inadequate control of blood sugar and other cardiovascular risk factors will impose an unsustainable burden of diabetes-related complications on already constrained regional health care systems. Existing data suggest that outcomes in individuals in SSA with diabetes are currently suboptimal with over 300,000 diabetes-related deaths before the age of 60 years in 2021,[1] highlighting the need to improve clinical care. Optimisation of diabetes management is contingent on numerous factors including the diagnosis of diabetes, appropriate escalation of therapy and patient adherence to therapeutic interventions, but effective strategies to improve diabetes management in SSA are hampered by a lack of knowledge about the extent of the deficiencies in this care continuum.

The cascade of care model, frequently used to identify deficits in HIV care, may be applied to diabetes to identify opportunities for improved outcomes.[2-4] The elements of the cascade, namely prevalence, awareness, treatment and control reflect aspects of the health care system, including effectiveness of prevention and detection strategies and the ability to implement and escalate therapy as necessary. On an individual level, diabetes awareness in particular is key to the adherence to lifestyle modification and medication that underpin glycaemic control. Evaluation of the diabetes care cascade allows policy makers to assess how well the health care system manages patients with diabetes and to identify areas for targeted interventions, particularly important in the resource-constrained lower and middle-income countries of SSA.

1  
2  
3  
4  
5  
6  
7  
8  
9  
10  
11  
12  
13  
14  
15  
16  
17  
18  
19  
20  
21  
22  
23  
24  
25  
26  
27  
28  
29  
30  
31  
32  
33  
34  
35  
36  
37  
38  
39  
40  
41  
42  
43  
44  
45  
46  
47  
48  
49  
50  
51  
52  
53  
54  
55  
56  
57  
58  
59  
60

Despite the benefits of establishing the diabetes care cascade, there is a paucity of primary data on it in SSA. Studies have often been limited to diabetes prevalence and awareness and conducted in hospital-based populations, introducing selection bias, while multi-country studies that have reported on the entire cascade have meta-analysed data from heterogeneous studies with methodological differences in determining each cascade stage. We aimed to evaluate the diabetes cascade of care in four SSA countries, using harmonised data collected across six sites, and performed exploratory analyses of the cascade stratified by sex and study site. We further investigated factors associated with the likelihood of having diabetes and being aware of a diagnosis of diabetes, the first two steps in the cascade.

## **METHODS**

### **Study Setting and Participants**

The AWI-Gen study and participating sites have been described in detail elsewhere.[5,6] In brief, 10,700 individuals were recruited from six sites in SSA in a community-based, cross-sectional study conducted between August 2013 and August 2016. Individuals were eligible for inclusion if they were aged 40-60 years and resided permanently in the study sites. Exclusion criteria were pregnancy and, given that one of the broader programme project objectives was to investigate genomic determinants of cardiometabolic disease, being closely related to an existing participant and recent immigration into the study site. We selected individuals aged 40-60 years as this is a peak time for the development of cardiometabolic disease. Three of the study sites were in South Africa (Soweto, Agincourt and Dikgale), one was in Kenya (Nairobi), one in Ghana (Navrongo) and

1  
2  
3 one in Burkina Faso (Nanoro). Participants were therefore included from southern,  
4 eastern and western Africa. The selected sites were also on a continuum of  
5 urbanisation: Nairobi and Soweto were urban sites, Agincourt and Dikgale were  
6 semi-rural and Nanoro and Navrongo were rural.  
7  
8  
9  
10  
11  
12  
13  
14

15 With the exception of Soweto, each study site is home to a Health and socio-  
16 Demographic Surveillance System (HDSS) which enumerates all residents within the  
17 HDSS on a regular basis, ensuring a well-defined population sampling frame. In  
18 Nairobi, Agincourt, Navrongo and Nanoro, individuals were randomly sampled from  
19 the sampling frame, while in Dikgale, a convenience sampling strategy was  
20 employed. In Soweto, 700 women who were participants in the Study of Women  
21 Entering an Endocrine Transition (SWEET) study[7] and caregivers of the Birth to  
22 Twenty+ cohort[8] were recruited. Additional female and all male participants were  
23 randomly recruited, using a sampling frame which covered the Soweto region.  
24  
25 Where necessary, there was oversampling to ensure equal numbers of women and  
26 men.  
27  
28  
29  
30  
31  
32  
33  
34  
35  
36  
37  
38  
39  
40  
41

## 42 **Patient and public involvement**

43  
44 Prior to the initiation of the AWI-Gen study, an extensive process of community  
45 engagement was conducted. This included meetings with civic and traditional  
46 leadership structures, household visits and group information sessions to discuss  
47 planned research activities. Study results were delivered annually to study  
48 participants, communities and community leaders.  
49  
50  
51  
52  
53  
54  
55  
56  
57

## 58 **Data Collection and Definitions**

1  
2  
3 Data were collected by study staff trained on standardised protocols.  
4

5 Sociodemographic data and personal and family medical history were self-reported.  
6

7 Additionally, individuals were considered to have hypertension if the mean systolic  
8 blood pressure of the latter two of three readings at the study visit  $\geq 140$  mmHg or the  
9 mean diastolic pressure  $\geq 90$  mmHg (Omron M6, Omron, Kyoto, Japan).[9]  
10  
11

12 Individuals were classified as HIV positive if they reported a previous diagnosis of  
13 HIV or if they tested positive on the rapid HIV tests that were offered to participants  
14 in South Africa and Kenya (MD HIV 1/2 test [Medical Diagnostech, Cape Town,  
15 South Africa]; One Step anti-HIV1+2 rapid screen test [InTec, Xiamen, China];  
16 Determine rapid test kit [Abbot Pharmaceuticals, Chicago, USA]). Rapid HIV tests  
17 were not offered in Ghana and Burkina Faso due to the low prevalence of HIV in  
18 those countries; individuals in these sites who did not know their HIV status were  
19 classified as HIV negative. Physical activity was assessed using the Global Physical  
20 Activity Questionnaire and occupational, leisure time and travel-related physical  
21 activity variables from this questionnaire were summed to give the total moderate-  
22 vigorous intensity physical activity (MVPA) in minutes per week. Individuals were  
23 classified as having no MVPA (0 minutes/week), insufficient MVPA (1-150  
24 minutes/week) or sufficient MVPA ( $\geq 150$  minutes/week).[10]  
25  
26  
27  
28  
29  
30  
31  
32  
33  
34  
35  
36  
37  
38  
39  
40  
41  
42  
43  
44  
45  
46

47 Standing height was measured with the participant barefoot or in light socks, using a  
48 Harpenden digital stadiometer (Holtain, Wales, UK). Weight was measured with the  
49 participant in light clothing, using a digital Physician Large Dial 200 kg capacity scale  
50 (Kendon Medical, South Africa) and body mass index was calculated as weight in kg  
51 divided by height in metres squared. Using a stretch-resistant measuring tape  
52  
53  
54  
55  
56  
57  
58  
59  
60

1  
2  
3 (SECA, Hamburg, Germany), hip circumference, as a measure of gluteofemoral fat,  
4  
5 was measured around the most protruding part of the buttocks.  
6  
7  
8  
9

10 Visceral and subcutaneous adipose tissue, direct measures of central adiposity  
11 associated with insulin resistance, were measured using abdominal ultrasound  
12 (LOGIQ e ultrasound system [GE Healthcare, CT, USA]). Study staff from all sites  
13 were centrally trained in Johannesburg, South Africa to perform the abdominal  
14 ultrasounds. Visceral adipose thickness was determined by the thickness of the fat  
15 pad between the anterior spine and peritoneal layer at end expiration, while  
16 subcutaneous adipose thickness was the thickness of the fat pad between the skin  
17 and the outer edge of the linea alba.  
18  
19  
20  
21  
22  
23  
24  
25  
26  
27  
28  
29

30 Venous blood was collected at study visits in potassium oxalate/sodium fluoride  
31 tubes and centrifuged immediately after collection, with the supernatant plasma  
32 stored at -80°C until analysis, according to a detailed sample processing protocol  
33 provided to all sites. Analyses for glucose were all performed at a central site, using  
34 colorimetric methods, on the Randox Plus clinical chemistry analyser (Randox, UK)  
35 with a range of 0.36–35 mmol/l and coefficient of variation <2.3%.  
36  
37  
38  
39  
40  
41  
42  
43  
44  
45  
46

47 Diabetes was defined as a previous diagnosis of diabetes by a health care provider,  
48 ever having received treatment for diabetes, or fasting plasma glucose  $\geq 7$  mmol/l or  
49 random plasma glucose  $\geq 11.1$  mmol/l [11,12] on the sample taken during the study  
50 visit. Samples were considered random if a participant had not fasted overnight or  
51 fasting status could not be confirmed. Participants were considered to be aware of a  
52 diagnosis of diabetes if they reported ever having been told by a health professional  
53  
54  
55  
56  
57  
58  
59  
60

1  
2  
3 that they had diabetes and were considered to have been treated for diabetes if they  
4 reported ever having received treatment for diabetes (dietary advice and/or glucose  
5 lowering agents) from a health care professional. Individuals were considered to  
6 have their diabetes controlled if fasting glucose was  $<7.2$  mmol/l.[11]  
7  
8  
9  
10  
11  
12  
13

### 14 **Statistical Analysis**

15  
16 Categorical participant characteristics of marital status, highest level of education,  
17 current smoking, known hypertension, known HIV positivity, family history of  
18 diabetes and physical activity category were described using frequencies and  
19 percentages, while medians and interquartile ranges (IQR) were used to describe  
20 continuous characteristics of age, body mass index, hip circumference, visceral fat  
21 and subcutaneous fat. The Mann-Whitney U, chi-squared and Fisher's exact tests  
22 were used to compare continuous and categorical variables respectively between  
23 groups defined by sex to investigate sex-related differences in potential determinants  
24 and groups defined by data missingness status to evaluate for bias between those  
25 who were included and those who were excluded from the analysis due to missing  
26 data.  
27  
28  
29  
30  
31  
32  
33  
34  
35  
36  
37  
38  
39  
40  
41  
42  
43  
44

45 Age-adjusted diabetes prevalence was determined using the United Nations African  
46 population distribution[13] as the reference population structure. The proportion of  
47 those aware of having diabetes was calculated as a percentage of those with  
48 diabetes and similarly, the proportion of those ever receiving treatment for diabetes  
49 was calculated as a percentage of those aware of having diabetes; the proportion of  
50 those who had their diabetes controlled was calculated as a percentage of those  
51 who reported ever receiving treatment. The method for interval estimation described  
52  
53  
54  
55  
56  
57  
58  
59  
60

1  
2  
3 by Tiwari et al.[14] was used to determine the 95% confidence intervals. The Soweto  
4 site was excluded from the latter two stages of the cascade as the 'ever receiving  
5 treatment' variable was not collected.  
6  
7  
8  
9

10  
11  
12 Multivariable logistic regression was used to assess the relationship between the  
13 odds of having diabetes and sociodemographic and clinical characteristics including  
14 urbanicity. Independent variables for inclusion in the logistic regression were  
15 selected based on previous research.[15,16] The Soweto site did not collect data on  
16 family history of diabetes and was therefore not included in this model, as family  
17 history of diabetes has been demonstrated in other settings to be strongly associated  
18 with higher odds of having the condition. Additional multivariable logistic regression  
19 models were also fit, using data from all sites, to investigate associations with  
20 awareness of a diagnosis of diabetes. In the model investigating associations with  
21 odds of having diabetes, we included visceral and subcutaneous fat as direct  
22 assessments of central obesity and hip circumference as a measure of gluteofemoral  
23 fat. In the model investigating associations with awareness, we used body mass  
24 index as the measure of obesity as we thought awareness was more likely to be  
25 associated with a global assessment of obesity rather than individual fat depots. We  
26 were underpowered to assess associations with diabetes treatment and control.  
27  
28  
29  
30  
31  
32  
33  
34  
35  
36  
37  
38  
39  
40  
41  
42  
43  
44  
45  
46  
47  
48

49 Sensitivity analyses were conducted in which associations with having diabetes and  
50 awareness of a diagnosis of diabetes were explored in analyses stratified by HIV  
51 prevalence, with the South African sites and Nairobi classified as high prevalence  
52 sites and Navrongo and Nanoro classified as low prevalence sites.  
53  
54  
55  
56  
57  
58  
59  
60



1  
2  
3 Missing data were handled using pairwise deletion. Analyses were conducted using  
4  
5 Stata v16 (StataCorp, USA).  
6  
7  
8  
9

## 10 **RESULTS**

### 11 **Sample Characteristics**

12  
13 The characteristics of the 10,700 study participants are shown in Supplemental  
14  
15 Table S1. There were 5,892 women (55%), with a median age of 50 years (IQR 45-  
16  
17 55). There was some inter-site variation in sociodemographic variables - while most  
18  
19 participants in the urban and semi-rural sites had some formal education, between  
20  
21 70-80% of participants in the rural sites did not. Smoking prevalence ranged  
22  
23 between 6% and 30% overall, with prevalence several fold higher in men than in  
24  
25 women in all sites. There was a high prevalence of chronic disease with 3,755 (37%)  
26  
27 participants having hypertension and 1,310 (12%) known as being HIV positive,  
28  
29 although inter-site variation was evident, with HIV prevalence being low, for example,  
30  
31 in Nanoro and Navrongo. Family history of diabetes was highest in the urban and  
32  
33 semi-rural areas. Anthropometric measures of obesity and subcutaneous fat were  
34  
35 higher in women in urban and semi-urban areas, while there were no clear sex  
36  
37 differences in Nanoro or Navrongo. Visceral fat was generally similar in both sexes.  
38  
39 The majority of individuals (82%) were undertaking at least 150 minutes of moderate  
40  
41 to vigorous physical activity weekly.  
42  
43  
44  
45  
46  
47  
48  
49  
50  
51  
52  
53  
54  
55  
56  
57  
58  
59  
60

### Missing Outcome Data

No participants had missing data on the diabetes status outcome, while 31 individuals had missing data on the awareness outcome and were slightly older (median age 54 vs 52 years;  $p=0.04$ ), less likely to be employed (32 vs 64%;  $p<0.01$ ) and had a different marital status distribution ( $p<0.01$ ) than those who were not missing these data.

### Diabetes Cascade of Care

The diabetes cascade of care is shown in Figure 1. The age-adjusted prevalence of diabetes in study participants was 5.5% (95%CI 4.4-6.5%) and was significantly higher in women (6.1% vs 4.9%;  $p<0.01$ ). Prevalence varied by site, with highest prevalence in the urban site of Soweto (9.0%; 95%CI 7.8-10%) and the lowest in rural Navrongo (1.3%; 95%CI 0.7-1.9%) (Supplemental Table S2). Diabetes prevalence was higher in women than men in Soweto and Nairobi (Soweto: 12% vs 6.3%,  $p<0.01$ ; Nairobi: 9.1% vs 4.1%,  $p<0.01$ ) while in Nanoro, the prevalence was higher in men (1.8% vs 4.7%,  $p<0.01$ ).

Overall, just over half of the 613 individuals with diabetes were aware of their condition (54%; 95%CI 50-58%), with the highest awareness in Navrongo (65%; 95%CI 43-84%) and the lowest in Nanoro (25%; 95%CI 16-37%), although confidence intervals across the sites were wide and overlapping. Nearly 75% of individuals aware of having diabetes reported ever receiving treatment, but only 38% (95%CI 30-41%) were adequately controlled. More women reported ever being treated for diabetes ( $p=0.01$ ), but there were no sex differences in participants achieving control ( $p=0.98$ ).

1  
2  
3  
4  
5 In logistic regression models, increasing age (odds ratio [OR] 1.1; 95%CI 1.0-1.1;  
6 p<0.01) and urban residence (OR 2.3; 95%CI 1.6-3.5; p<0.01) were associated with  
7 higher odds of having diabetes (Table 1). Hypertension was also associated with  
8 having diabetes (OR 1.9; 95%CI 1.5-2.4; p<0.01), as was family history of diabetes  
9 (OR 3.9; 95%CI 3.0-5.1; p<0.01); conversely, known HIV positivity was associated  
10 with lower odds of diabetes (OR 0.6; 95%CI 0.4-0.9; p<0.01). Visceral and  
11 subcutaneous fat were also associated with higher odds, while there was a marginal  
12 negative association with hip circumference (Table 1).  
13  
14  
15  
16  
17  
18  
19  
20  
21  
22  
23  
24  
25

26 Similar associations were evident in sensitivity analyses restricted to sites with high  
27 HIV prevalence (Supplemental Table S3). However, only family history remained  
28 significantly associated with diabetes in low HIV prevalence settings, although  
29 previously unobserved associations with male sex and physical activity emerged  
30 (Supplemental Table S4). These analyses were however limited by the low  
31 prevalence of diabetes in these settings which meant they were underpowered.  
32  
33  
34  
35  
36  
37  
38  
39  
40  
41

42 Increasing age (OR 1.1; 95%CI 1.0-1.1; p=0.02), semi-rural environment (OR 2.5;  
43 95%CI 1.1-5.7; p=0.02) and secondary education (OR 2.4; 95%CI 1.2-4.9; p=0.02)  
44 were all associated with greater likelihood of awareness of diabetes, as were the  
45 chronic conditions of hypertension (OR 1.6; 95%CI 1.0-2.4; p=0.04) and known HIV  
46 positivity (OR 2.3; 95%CI 1.2-4.4; p=0.02) (Table 2). In sensitivity analyses in high  
47 HIV prevalence sites, only hypertension and known HIV positivity remained  
48 associated with higher awareness of diabetes (Supplemental Table S5). The sample  
49 size in low HIV prevalence sites was too small to perform meaningful analyses.  
50  
51  
52  
53  
54  
55  
56  
57  
58  
59  
60

Table 1. Factors associated with odds of having diabetes in five sub-Saharan African sites (Agincourt, Dikgale, Nairobi, Nanoro & Navrongo)<sup>1</sup>

|                                     | Odds Ratio | 95% confidence interval | p value |
|-------------------------------------|------------|-------------------------|---------|
| Age                                 | 1.1        | 1.0-1.1                 | <0.01   |
| <b>Sex</b>                          |            |                         |         |
| Women                               | reference  |                         |         |
| Men                                 | 1.1        | 0.8-1.5                 | 0.65    |
| <b>Location</b>                     |            |                         |         |
| Rural                               | reference  |                         |         |
| Semi-rural                          | 1.5        | 1.0-2.3                 | 0.08    |
| Urban                               | 2.3        | 1.6-3.5                 | <0.01   |
| <b>Marital status</b>               |            |                         |         |
| Currently married or cohabitating   | reference  |                         |         |
| Never married or cohabitating       | 1.4        | 0.9-2.0                 | 0.15    |
| Previously married                  | 1.0        | 0.8-1.3                 | 0.99    |
| <b>Educational attainment</b>       |            |                         |         |
| No formal education                 | reference  |                         |         |
| Primary education                   | 1.2        | 0.9-1.7                 | 0.29    |
| Secondary education                 | 1.0        | 0.7-1.5                 | 0.84    |
| Tertiary education                  | 1.4        | 0.7-2.6                 | 0.37    |
| <b>Employment status</b>            |            |                         |         |
| Unemployed                          | reference  |                         |         |
| Employed                            | 1.1        | 0.8-1.5                 | 0.48    |
| <b>Smoking status</b>               |            |                         |         |
| No history of smoking               | reference  |                         |         |
| Current smoker                      | 0.7        | 0.4-1.1                 | 0.15    |
| <b>History of hypertension</b>      |            |                         |         |
| No                                  | reference  |                         |         |
| Yes                                 | 1.9        | 1.5-2.4                 | <0.01   |
| <b>Known HIV positivity</b>         |            |                         |         |
| No                                  | reference  |                         |         |
| Yes                                 | 0.6        | 0.4-0.9                 | 0.01    |
| <b>Family history of diabetes</b>   |            |                         |         |
| No                                  | reference  |                         |         |
| Yes                                 | 3.9        | 3.0-5.1                 | <0.01   |
| <b>Physical activity categories</b> |            |                         |         |
| Absent                              | reference  |                         |         |
| Insufficient                        | 0.9        | 0.5-1.5                 | 0.61    |
| Sufficient                          | 0.7        | 0.5-1.0                 | 0.08    |
| Hip circumference                   | 1.0        | 1.0-1.0                 | 0.04    |
| Visceral fat                        | 1.2        | 1.1-1.2                 | <0.01   |
| Subcutaneous fat                    | 1.3        | 1.1-1.4                 | <0.01   |

<sup>1</sup>7,425 participants were included in the analysis. Participants from the Soweto site were excluded as data on family history were not collected. Age was entered as a continuous variable

Table 2. Factors associated with awareness of diabetes in six sub-Saharan African sites (Agincourt, Dikgale, Nairobi, Nanoro, Navrongo & Soweto)<sup>1</sup>

|                                   | Odds Ratio | 95% confidence interval | p value |
|-----------------------------------|------------|-------------------------|---------|
| Age                               | 1.0        | 1.0-1.1                 | 0.02    |
| <b>Sex</b>                        |            |                         |         |
| Women                             | reference  |                         |         |
| Men                               | 1.1        | 0.7-1.8                 | 0.59    |
| <b>Location</b>                   |            |                         |         |
| Rural                             | reference  |                         |         |
| Semi-rural                        | 2.5        | 1.1-5.7                 | 0.02    |
| Urban                             | 1.5        | 0.7-3.1                 | 0.34    |
| <b>Marital status</b>             |            |                         |         |
| Currently married or cohabitating | reference  |                         |         |
| Never married or cohabitating     | 0.9        | 0.4-2.0                 | 0.84    |
| Previously married                | 1.0        | 0.6-1.7                 | 0.86    |
| <b>Educational attainment</b>     |            |                         |         |
| No formal education               | reference  |                         |         |
| Primary education                 | 1.8        | 0.9-3.5                 | 0.09    |
| Secondary education               | 2.4        | 1.2-4.9                 | 0.02    |
| Tertiary education                | 2.1        | 0.7-6.1                 | 0.17    |
| <b>Employment status</b>          |            |                         |         |
| Unemployed                        | reference  |                         |         |
| Employed                          | 0.8        | 0.5-1.3                 | 0.45    |
| <b>History of hypertension</b>    |            |                         |         |
| No                                |            |                         |         |
| Yes                               | 1.6        | 1.0-2.4                 | 0.04    |
| <b>Known HIV positivity</b>       |            |                         |         |
| No                                | reference  |                         |         |
| Yes                               | 2.3        | 1.2-4.4                 | 0.02    |
| Body mass index                   | 1.0        | 1.0-1.0                 | 0.97    |

<sup>1</sup>472 participants were included in the analysis. Age and body mass index were entered as continuous variables.

## DISCUSSION

In this multi-country study of the diabetes care cascade in SSA, we demonstrate attrition at each stage of the cascade with just over half of those with diabetes being aware of their condition and only approximately a third of those who reported ever receiving treatment achieving optimal glycaemic control. We also report sociodemographic and clinical factors associated with increased odds of having diabetes including older age, urban residence and having hypertension and factors associated with awareness of having diabetes which included increasing age, semi-

1  
2  
3 rural environment, secondary education and having hypertension or known HIV  
4  
5 positivity.  
6  
7  
8  
9

10 Our prevalence estimate of 5.5% is similar to the 2019 International Diabetes  
11 Federation (IDF) estimate for SSA of 4.7% in adults aged 20-79 years.[1] A sub-  
12 regional meta-analysis from western Africa revealed a lower prevalence (4.0% in  
13 urban adults and 2.6% in rural adults),[17] in keeping with our study where  
14 prevalence in the western African sites was two to three times lower than in the  
15 southern and eastern African sites. Factors in our study associated with higher odds  
16 of having diabetes, such as increasing age and urban residence, have been  
17 previously reported, with the western African meta-analysis reporting over a threefold  
18 increase in prevalence in people over 50 years[17] and Werfalli et al. reporting a  
19 prevalence of 20% in people living in urban areas vs 7.9% in those in rural areas.[18]  
20 Our findings of associations with family history of diabetes, hypertension and  
21 adiposity support results from other country-level meta-analyses in Africa.[19,20] We  
22 also noted lower odds of having diabetes in individuals with known HIV in keeping  
23 with other studies that have identified lower prevalence of cardiometabolic risk  
24 factors in individuals with HIV in SSA.[21,22]  
25  
26  
27  
28  
29  
30  
31  
32  
33  
34  
35  
36  
37  
38  
39  
40  
41  
42  
43  
44  
45  
46

47 While our estimate of the prevalence of diabetes unawareness of 47% was broadly  
48 similar to the 2019 IDF estimate of the prevalence of undiagnosed diabetes of 60%  
49 in SSA,[1] it did contrast sharply with other studies. A meta-analysis of 23 studies  
50 from across Africa estimated a much lower pooled prevalence of undiagnosed  
51 diabetes of just under 4%.[23] There was however significant heterogeneity in the  
52 included studies and the majority of the data originated from a single country, which  
53  
54  
55  
56  
57  
58  
59  
60

1  
2  
3 may not be representative of other countries in the region. This itself differed  
4  
5 considerably from data from 12 nationally representative surveys in SSA in which  
6  
7 73% of those with diabetes were unaware of their condition, with factors similar to  
8  
9 our study, namely older age and higher level of educational attainment, associated  
10  
11 with awareness.[24] Our findings also suggest that those with chronic diseases such  
12  
13 as HIV and hypertension may be more aware of having diabetes, which may be due  
14  
15 to increased contact with the health care system.[25]  
16  
17  
18  
19  
20

21 In a study reporting data from 15 sub-Saharan African countries, approximately 40%  
22  
23 of adults with diabetes received glucose-lowering medication, while approximately  
24  
25 25% received counselling on diet, exercise or weight loss.[2] These proportions are  
26  
27 lower than ours which may be due to the difference in denominators - we used a  
28  
29 denominator of individuals aware of having diabetes rather than all those with  
30  
31 diabetes. In another study reporting data from 12 sub-Saharan African countries, just  
32  
33 over 30% of those with diabetes were aware of their condition, with a similar  
34  
35 percentage ever having received lifestyle advice or currently receiving diabetes  
36  
37 medication and just over 20% achieving control. [3] While this study also used a  
38  
39 fixed denominator of the number of people with diabetes, the results support our  
40  
41 finding that there is not a major fall-off between the stages of awareness and  
42  
43 treatment and the most significant deficits are at the stages of awareness of having  
44  
45 diabetes i.e., diagnosis and achieving glycaemic control. Of note, this study used a  
46  
47 more liberal definition of glycaemic control than our study (FPG <10.1 mmol/l or  
48  
49 HbA1c <8% in the single study in which it was available) and may have identified a  
50  
51 more drastic control deficit if a threshold for glycaemic control similar to ours had  
52  
53 been used. A country-level meta-analysis of 22 studies from Ethiopia suggested a  
54  
55  
56  
57  
58  
59  
60

1  
2  
3 similar degree of glycaemic control as our study, with approximately a third of those  
4 included achieving glycaemic targets, regardless of whether these were assessed  
5 using fasting plasma glucose or HbA<sub>1c</sub>. [26]  
6  
7  
8  
9

10  
11  
12 We describe, to our knowledge, the first study in SSA in which harmonised primary  
13 data on the diabetes care cascade have been collected from multiple countries.  
14

15  
16 Previous multi-country research in SSA on this subject has relied on systematic  
17 reviews and meta-analyses and has therefore been limited by the methodological  
18 heterogeneity of the constituent studies, including the use of different biomarkers to  
19 define diabetes. In our work, data were collected in a standardised manner and in  
20 addition to self-report, we used venous blood samples, analysed at a single  
21 laboratory, to ascertain biochemical evidence of diabetes. Our study also included  
22 over 10,000 men and women from three sub-regions of SSA.  
23  
24  
25  
26  
27  
28  
29  
30  
31  
32  
33

34  
35 Our study does have limitations. We did not distinguish between type 1 and type 2  
36 diabetes and the care cascade and associated factors may differ between these two  
37 conditions. While we used accepted and convenient diagnostic criteria for diabetes,  
38 we may have underestimated the prevalence of diabetes as we did not assess  
39 glucose tolerance and may therefore have excluded those who met the criteria for  
40 diabetes only after a glucose challenge, which may be particularly important in  
41 populations of African descent. Both oral glucose tolerance tests and HbA<sub>1c</sub>, appear  
42 to classify more African-ancestry individuals as having diabetes than FPG alone [27,  
43 28] and use of either of these criteria may have increased diabetes prevalence in our  
44 study. Our research was conducted in HDSS sites and among a research cohort in  
45 Soweto, populations which may not be nationally representative. Indeed, individuals  
46  
47  
48  
49  
50  
51  
52  
53  
54  
55  
56  
57  
58  
59  
60



1  
2  
3 in these sites may have been told they had diabetes while taking part in previous  
4  
5 studies, making the proportion of individuals with diabetes who know they have the  
6  
7 condition higher than in the general population. We also used self-report rather than  
8  
9 clinical records to determine ever receiving diabetes treatment. Fasting plasma  
10  
11 glucose was used to assess diabetes control and this provides an evaluation only at  
12  
13 a single point in time and may be subject to more analytic variability than HbA<sub>1c</sub>,  
14  
15 which has largely supplanted it in clinical use in well-resourced environments.  
16  
17 Several large scale epidemiological studies have however used plasma glucose  
18  
19 measures to assess glycaemic control.[2,3]  
20  
21  
22  
23  
24  
25

26 Despite these limitations, our study provides valuable information on the burden of  
27  
28 diabetes in SSA and the deficiencies which need to be addressed to improve  
29  
30 outcomes. In areas where diabetes prevalence is low, primordial prevention  
31  
32 strategies should be employed to reduce the likelihood of developing risk factors  
33  
34 such as obesity, with particular focus on higher risk urban environments. Screening  
35  
36 of at-risk populations needs to be enhanced and the low percentage of individuals  
37  
38 attaining satisfactory glycaemic control suggests that more aggressive, treat to target  
39  
40 strategies need to be promoted among health care workers, although we  
41  
42 acknowledge this may be limited by drug availability in many parts of the continent.  
43  
44  
45  
46  
47  
48

49 Additional work is necessary to understand whether our findings are applicable to  
50  
51 other SSA countries and sub-regions at different stages of the epidemiological  
52  
53 transition and with variable access to health care. It is also essential to understand  
54  
55 key determinants of ever receiving diabetes treatment and control, which we were  
56  
57 underpowered to investigate, and care cascades for other important vascular risk  
58  
59  
60

1  
2  
3 factors in people with diabetes, such as elevated blood pressure and dyslipidaemia.  
4  
5 Identification of the points in each of these care cascades at which significant  
6  
7 attrition is occurring will assist public health officials in developing appropriate  
8  
9 interventions to reduce diabetes-related morbidity and mortality.  
10  
11  
12  
13  
14  
15  
16  
17  
18  
19  
20  
21  
22  
23  
24  
25  
26  
27  
28  
29  
30  
31  
32  
33  
34  
35  
36  
37  
38  
39  
40  
41  
42  
43  
44  
45  
46  
47  
48  
49  
50  
51  
52  
53  
54  
55  
56  
57  
58  
59  
60

For peer review only

## ACKNOWLEDGEMENTS

Author contributions: ANW-conceptualisation, writing-original draft, review and editing, funding acquisition; IM-formal analysis, writing-review and editing; GoAg-data collection, investigation, writing-review and editing; GeAs-data collection, investigation, writing-review and editing; PRB-data collection, investigation, writing-review and editing, funding acquisition; SC-investigation, writing-review and editing; FXGO-data collection, investigation, writing-review and editing, funding acquisition; EM-investigation, writing-review and editing; LKM- investigation, writing-review and editing; SFM-investigation, writing-review and editing; EAN-data collection, investigation, writing-review and editing; SAN-conceptualisation, investigation, writing-review and editing; HS-data collection, investigation writing-review and editing; MR-conceptualisation, writing-review and editing, project administration, funding acquisition; NJC-conceptualisation, writing-review and editing, funding acquisition

ANW and MR had full access to all the data in the study and take responsibility for the integrity of the data. IM performed the data analysis and takes responsibility for its accuracy. All authors consent to the publication of this manuscript and agree to be accountable for all aspects of this work.

Funding sources: The AWI-Gen Collaborative Centre is funded by the National Human Genome Research Institute (NHGRI), Office of the Director (OD), the Eunice Kennedy Shriver National Institute of Child Health & Human Development (NICHD), the National Institute of Environmental Health Sciences (NIEHS), the Office of AIDS Research (OAR) and the National Institute of Diabetes and Digestive and Kidney

1  
2  
3 Diseases (NIDDK) of the National Institutes of Health (NIH) [grant number  
4 U54HG006938 and its supplements], as part of the H3Africa Consortium as well as  
5  
6 by the Department of Science and Innovation, South Africa [grant number DST/CON  
7  
8 0056/2014].  
9  
10  
11  
12

13  
14 Funding for the Soweto site was also received from the South African Medical  
15  
16 Research Council.  
17  
18

19  
20 ANW is supported by the Fogarty International Centre, National Institutes of Health  
21  
22 [grant number K43TW010698].  
23  
24  
25

26  
27 This paper describes the views of the authors and does not necessarily represent  
28  
29 the official views of the National Institutes of Health (USA) or the South African  
30  
31 Department of Science and Innovation who funded this research. The funders had  
32  
33 no role in study design, data collection, analysis and interpretation, report writing or  
34  
35 the decision to submit this article for publication.  
36  
37  
38

39  
40 Conflict of interest disclosures: ANW declares an honorarium received from Sanofi  
41  
42 for serving as a panel member at an educational event on thyroid cancer. SAN  
43  
44 declares participation in a data safety monitoring board of a Phase IV open-label trial  
45  
46 to assess bone mineral density in a cohort of African women on Depo-Provera and  
47  
48 tenofovir disoproxil fumarate switched to tenofovir alafenamide fumarate based anti-  
49  
50 retroviral therapy and Council membership in the International Society of  
51  
52  
53  
54  
55  
56 Developmental Origins of Health and Disease.  
57  
58  
59  
60

1  
2  
3 Data statement: De-identified individual participant data from the AWI-Gen study are  
4 available from the European Genome-Phenome Archive (EGA) at study number  
5  
6 EGA00001002482 [[https://ega459 archive.org/datasets/EGAD00001006425](https://ega459.archive.org/datasets/EGAD00001006425)].  
7  
8  
9  
10  
11  
12  
13  
14  
15  
16  
17  
18  
19  
20  
21  
22  
23  
24  
25  
26  
27  
28  
29  
30  
31  
32  
33  
34  
35  
36  
37  
38  
39  
40  
41  
42  
43  
44  
45  
46  
47  
48  
49  
50  
51  
52  
53  
54  
55  
56  
57  
58  
59  
60

For peer review only

## Ethics Approval

Written informed consent was provided by participants in their local languages.

Ethical approval for the AWI-Gen study was provided by the Human Research Ethics Committee (Medical) of the University of the Witwatersrand (M121029, M170880).

Each of the HDSS centres also obtained ethical approval according to their respective institutional and country-specific regulations.

For peer review only

## REFERENCES

1. International Diabetes Federation. IDF Diabetes Atlas, 10th edn. Brussels, Belgium, 2021.
2. Flood D, Seiglie JA, Dunn M, et al. The state of diabetes treatment coverage in 55 low-income and middle-income countries: a cross-sectional study of nationally representative, individual-level data in 680 102 adults. *Lancet Healthy Longev.* 2021;2:e340-e351. doi: 10.1016/s2666-7568(21)00089-1
3. Manne-Goehler J, Geldsetzer P, Agoudavi K, et al. Health system performance for people with diabetes in 28 low- and middle-income countries: a cross-sectional study of nationally representative surveys. *PLoS Med.* 2019;16:e1002751. doi: 10.1371/journal.pmed.1002751.
4. Kazemian P, Shebl FM, McCann N, Walensky RP, Wexler DJ. Evaluation of the cascade of diabetes care in the United States, 2005-2016. *JAMA Intern Med.* 2019;179:1376–1385. doi: 10.1001/jamainternmed.2019.2396.
5. Ramsay M, Crowther N, Tambo E, et al. H3Africa AWI-Gen Collaborative Centre: a resource to study the interplay between genomic and environmental risk factors for cardiometabolic diseases in four sub-Saharan African countries. *Glob Health Epidemiol Genom.* 2016;1:e20. doi: 10.1017/gheg.2016.17.
6. Ali SA, Soo C, Agongo G, et al. Genomic and environmental risk factors for cardiometabolic diseases in Africa: methods used for Phase 1 of the AWI-Gen population cross-sectional study. *Glob Health Action.* 2018;11(Suppl 2):1507133. doi: 10.1080/16549716.2018.1507133.
7. Jaff NG, Norris SA, Snyman T, Toman M, Crowther NJ. Body composition in the Study of Women Entering and in Endocrine Transition (SWEET): a perspective of African women who have a high prevalence of obesity and HIV infection. *Metabolism.* 2015;64:1031–1041. doi:10.1016/j.metabol.2015.05.009
8. Richter L, Norris S, Pettifor J, Yach D, Cameron N. Cohort profile: Mandela's children: the 1990 Birth to Twenty study in South Africa. *Int J Epidemiol.* 2007;36:504–511. doi: 10.1093/ije/dym016
9. Unger T, Borghi C, Charchar F, et al. 2020 International Society of Hypertension global hypertension practice guidelines. *Hypertension.* 2020;75:1334-1357. doi: 10.1161/HYPERTENSIONAHA.120.15026
10. World Health Organisation. Global Physical Activity Questionnaire analysis guide. <https://www.who.int/ncds/surveillance/steps/GPAQ/en/> (accessed October 30, 2020).
11. American Diabetes Association. Standards of medical care in diabetes-2021. *Diabetes Care.* 2021;44(Suppl 1):S73–S84.
12. Diagnosis and management of type 2 diabetes (HEARTS-D). Geneva]: World Health Organization; 2020 (WHO/UCN/NCD/20.1). Licence: CC BY-NC-SA 3.0 IGO
13. United Nations Department of Economic and Social Affairs. World Population Prospects 2019. <https://population.un.org/wpp/DataQuery/> (accessed June 29, 2021).

14. Tiwari RC, Clegg LX, Zou Z. Efficient interval estimation for age-adjusted cancer rates. *Stat Methods Med Res*. 2006;15:547–569. doi: 10.1177/0962280206070621
15. Mbanya JC, Motala AA, Sobngwi E, Assah FK, Enoru ST. Diabetes in sub-Saharan Africa. *Lancet*. 2010;375:2254–2266. doi: 10.1016/S0140-6736(10)60550-8
16. Pinchevsky Y, Butkow N, Raal FJ, Chirwa T, Rothberg A. Demographic and clinical factors associated with development of type 2 diabetes: a review of the literature. *Int J Gen Med*. 2020;13:121–129. doi: 10.2147/IJGM.S226010
17. Abubakari AR, Lauder W, Jones MC, Kirk A, Agyemang C, Bhopal RS. Prevalence and time trends in diabetes and physical inactivity among adult West African populations: the epidemic has arrived. *Public Health*. 2009;123:602–614. doi: 10.1016/j.puhe.2009.07.009
18. Werfalli M, Engel ME, Musekiwa A, Kengne AP, Levitt NS. The prevalence of type 2 diabetes among older people in Africa: a systematic review. *Lancet Diabetes Endocrinol*. 2016;4:72–84. doi: 10.1016/S2213-8587(15)00363-0
19. Bigna JJ, Nansseu JR, Katte JC, Noubiap JJ. Prevalence of prediabetes and diabetes mellitus among adults residing in Cameroon: a systematic review and meta-analysis. *Diabetes Res Clin Pract*. 2018;137:109–118. doi: 10.1016/j.diabres.2017.12.005
20. Asamoah-Boaheng M, Sarfo-Kantanka O, Tuffour AB, Eghan B, Mbanya JC. Prevalence and risk factors for diabetes mellitus among adults in Ghana: a systematic review and meta-analysis. *Int Health*. 2019;11:83–92. doi: 10.1093/inthealth/ihy067
21. Gaziano TA, Abrahams-Gessel S, Gomez-Olive FX, et al. Cardiometabolic risk in a population of older adults with multiple co-morbidities in rural South Africa: the HAALSI (Health and Aging in Africa: Longitudinal Studies of INDEPTH communities) study. *BMC Public Health*. 2017;17:206. doi: 10.1186/s12889-017-4117-y
22. Nonterah EA, Boua PR, Klipstein-Grobusch K, et al. Classical cardiovascular risk factors and HIV are associated with carotid intima-media thickness in adults from sub-Saharan Africa: findings from H3Africa AWI-Gen study. *J Am Heart Assoc*. 2019;8:e011506. doi: 10.1161/JAHA.118.011506
23. Dessie G, Mulugeta H, Amare D, et al. A systematic analysis on prevalence and sub-regional distribution of undiagnosed diabetes mellitus among adults in African countries. *J Diabetes Metab Disord*. 2020;19:1931–1941. doi: 10.1007/s40200-020-00635-9
24. Manne-Goehler J, Atun R, Stokes A, et al. Diabetes diagnosis and care in sub-Saharan Africa: pooled analysis of individual data from 12 countries. *Lancet Diabetes Endocrinol*. 2016;4:903–912. doi: 10.1016/S2213-8587(16)30181-4
25. Manne-Goehler J, Montana L, Gómez-Olivé FX, et al. The ART advantage: health care utilization for diabetes and hypertension in rural South Africa. *J Acquir Immune Defic Syndr*. 2017;75:561-567. doi:10.1097/QAI.0000000000001445
26. Gebreyohannes EA, Netere AK, Belachew SA. Glycemic control among diabetic patients in Ethiopia: a systematic review and meta-analysis. *PLoS One*. 2019;14:e0221790. doi: 10.1371/journal.pone.0221790
27. Jagannathan R, DuBose CW, Mabundo LS, et al. The OGTT is highly reproducible in Africans for the diagnosis of diabetes: implications for



- 1  
2  
3 treatment and protocol design. *Diabetes Res Clin Pract.* 2020;170:108523.  
4 doi: 10.1016/j.diabres.2020.108523  
5  
6 28. Wade AN, Crowther NJ, Abrahams-Gessel S, et al. Concordance between  
7 fasting plasma glucose and HbA1c in the diagnosis of diabetes in black South  
8 African adults: a cross-sectional study. *BMJ Open.* 2021;11:e046060. doi:  
9 10.1136/bmjopen-2020-046060  
10  
11  
12  
13  
14  
15  
16  
17  
18  
19  
20  
21  
22  
23  
24  
25  
26  
27  
28  
29  
30  
31  
32  
33  
34  
35  
36  
37  
38  
39  
40  
41  
42  
43  
44  
45  
46  
47  
48  
49  
50  
51  
52  
53  
54  
55  
56  
57  
58  
59  
60

For peer review only

1  
2  
3 Figure 1. Diabetes cascade of care in six sub-Saharan African countries, overall and  
4 stratified by gender  
5  
6

7  
8 Estimates given as counts and proportions with 95% confidence intervals and  
9 proportions calculated as percentages of eligible individuals in previous stage.  
10  
11

12 Estimates for ever receiving treatment and achieving glycaemic control (calculated  
13 as percentage of those who ever received treatment) exclude Soweto as the  
14 treatment variable was not collected at that site. Data on diabetes control were  
15 missing for a further 17 participants.  
16  
17  
18  
19  
20  
21  
22  
23  
24  
25  
26  
27  
28  
29  
30  
31  
32  
33  
34  
35  
36  
37  
38  
39  
40  
41  
42  
43  
44  
45  
46  
47  
48  
49  
50  
51  
52  
53  
54  
55  
56  
57  
58  
59  
60



Figure 1. Diabetes cascade of care in six sub-Saharan African countries, overall and stratified by gender. Estimates given as counts and proportions with 95% confidence intervals and proportions calculated as percentages of eligible individuals in previous stage. Estimates for ever receiving treatment and achieving glycaemic control (calculated as percentage of those who ever received treatment) exclude Soweto as the treatment variable was not collected at that site. Data on diabetes control were missing for a further 17 participants.

139x101mm (300 x 300 DPI)

## Supplemental material

Supplemental Table S1. Demographic and clinical characteristics of 10,700 study participants in six sub-Saharan African sites

Supplemental Table S2. Diabetes care cascade by study site

Supplemental Table S3. Factors associated with odds of having diabetes across three sub-Saharan African sites with high HIV prevalence (Agincourt, Dikgale & Nairobi)

Supplemental Table S4. Factors associated with odds of having diabetes across two sub-Saharan African sites with low HIV prevalence (Navrongo & Nanoro)

Supplemental Table S5. Factors associated with awareness in high HIV prevalence sites (Agincourt, Dikgale, Nairobi & Soweto)

peer review only

1  
2**Table S1. Demographic and clinical characteristics of 10,700 study participants in six sub-Saharan African sites**

|                                   | Soweto         |                |               | Agincourt     |               |               | Dikgale       |               |               | Nanoro         |                |               | Navrongo      |                |               | Nairobi       |                |               | Overall        |                |               |
|-----------------------------------|----------------|----------------|---------------|---------------|---------------|---------------|---------------|---------------|---------------|----------------|----------------|---------------|---------------|----------------|---------------|---------------|----------------|---------------|----------------|----------------|---------------|
|                                   | Men            | Women          | Overall       | Men           | Women         | Overall       | Men           | Women         | Overall       | Men            | Women          | Overall       | Men           | Women          | Overall       | Men           | Women          | Overall       | Men            | Women          | Overall       |
|                                   | n=1,025<br>51% | n=1,002<br>49% | n=2,027       | n=573<br>39%  | n=892<br>61%  | n=1,465       | n=356<br>31%  | n=812<br>69%  | n=1,168       | n=1,045<br>50% | n=1,039<br>50% | n=2,084       | n=923<br>46%  | n=1,091<br>54% | n=2,014       | n=886<br>46%  | n=1,056<br>54% | n=1,942       | n=4,808<br>45% | n=5,892<br>55% | n=10,700      |
| Age (years)                       | 49<br>(44-55)  | 49<br>(44-54)  | 49<br>(44-54) | 51<br>(45-56) | 51<br>(46-56) | 51<br>(46-56) | 50<br>(45-55) | 51<br>(46-56) | 51<br>(45-55) | 50<br>(44-55)  | 50<br>(45-54)  | 50<br>(45-55) | 50<br>(46-55) | 52<br>(47-56)  | 51<br>(46-56) | 48<br>(44-53) | 48<br>(44-52)  | 48<br>(44-53) | 50<br>(45-55)  | 50<br>(45-55)  | 50<br>(45-55) |
| Marital status (%)                |                |                |               |               |               |               |               |               |               |                |                |               |               |                |               |               |                |               |                |                |               |
| Currently married/<br>Cohabiting  | 570<br>(56)    | 266<br>(27)    | 836<br>(41)   | 445<br>(78)   | 537<br>(60)   | 982<br>(67)   | 178<br>(50)   | 427<br>(53)   | 605<br>(52)   | 1,021<br>(98)  | 794<br>(76)    | 1,815<br>(87) | 787<br>(85)   | 694<br>(64)    | 1,481<br>(74) | 808<br>(91)   | 486<br>(46)    | 1,294<br>(67) | 3,809<br>(79)  | 3,204<br>(54)  | 7,013<br>(66) |
| Never married/<br>Cohabiting      | 265<br>(26)    | 51<br>(5.1)    | 316<br>(16)   | 75<br>(13)    | 59<br>(6.6)   | 134<br>(9.2)  | 103<br>(29)   | 185<br>(23)   | 288<br>(25)   | 14<br>(1.3)    | 3<br>(0.3)     | 17<br>(0.8)   | 15<br>(1.6)   | 5<br>(0.5)     | 20<br>(1.0)   | 13<br>(1.5)   | 70<br>(6.6)    | 83<br>(4.3)   | 485<br>(10)    | 373<br>(6.3)   | 858<br>(8.0)  |
| Previously married                | 189<br>(19)    | 347<br>(35)    | 536<br>(26)   | 53<br>(9.2)   | 296<br>(33)   | 349<br>(24)   | 75<br>(22)    | 200<br>(25)   | 275<br>(24)   | 8<br>(0.8)     | 238<br>(23)    | 246<br>(12)   | 120<br>(13)   | 392<br>(36)    | 512<br>(26)   | 65<br>(7.3)   | 499<br>(47)    | 564<br>(29)   | 510<br>(11)    | 1,972<br>(33)  | 2,482<br>(23) |
| Missing                           | 1<br>(0.1)     | 338<br>(34)    | 339<br>(17)   | 0<br>(0)      | 0<br>(0)      | 0<br>(0)      | 0<br>(0)      | 0<br>(0)      | 0<br>(0)      | 2<br>(0.2)     | 4<br>(0.4)     | 6<br>(0.3)    | 1<br>(0.1)    | 0<br>(0)       | 1<br>(0.1)    | 0<br>(0)      | 1<br>(0.1)     | 1<br>(0.1)    | 4<br>(0.1)     | 343<br>(5.8)   | 347<br>(3.2)  |
| Highest level of<br>education (%) |                |                |               |               |               |               |               |               |               |                |                |               |               |                |               |               |                |               |                |                |               |
| No formal<br>education            | 8<br>(0.8)     | 2<br>(0.2)     | 10<br>(0.5)   | 23<br>(22)    | 280<br>(31)   | 403<br>(28)   | 22<br>(6.2)   | 74<br>(9.1)   | 96<br>(8.2)   | 758<br>(73)    | 960<br>(92)    | 1,718<br>(82) | 570<br>(62)   | 843<br>(77)    | 1,413<br>(70) | 34<br>(3.8)   | 113<br>(11)    | 147<br>(7.6)  | 1,515<br>(32)  | 2,272<br>(39)  | 3,787<br>(35) |
| Primary<br>education              | 117<br>(11)    | 636<br>(64)    | 753<br>(37)   | 235<br>(41)   | 340<br>(38)   | 575<br>(39)   | 113<br>(32)   | 273<br>(34)   | 386<br>(33)   | 181<br>(17)    | 58<br>(5.6)    | 239<br>(12)   | 206<br>(22)   | 177<br>(16)    | 383<br>(19)   | 447<br>(51)   | 663<br>(63)    | 1,110<br>(57) | 1,299<br>(27)  | 2,147<br>(36)  | 3,446<br>(32) |
| Secondary<br>education            | 748<br>(73)    | 147<br>(15)    | 895<br>(44)   | 175<br>(31)   | 223<br>(25)   | 398<br>(27)   | 204<br>(57)   | 440<br>(54)   | 644<br>(55)   | 86<br>(8.2)    | 10<br>(1)      | 96<br>(4.6)   | 118<br>(13)   | 57<br>(5.2)    | 175<br>(8.7)  | 383<br>(43)   | 276<br>(26)    | 659<br>(34)   | 1,714<br>(36)  | 1,153<br>(20)  | 2,867<br>(27) |
| Tertiary<br>education             | 152<br>(15)    | 1<br>(0.1)     | 153<br>(7.5)  | 39<br>(6.8)   | 49<br>(5.5)   | 88<br>(6.0)   | 17<br>(4.8)   | 24<br>(3.0)   | 41<br>(3.5)   | 16<br>(1.5)    | 2<br>(0.2)     | 18<br>(0.9)   | 27<br>(2.9)   | 9<br>(0.8)     | 36<br>(1.8)   | 22<br>(2.5)   | 4<br>(0.4)     | 26<br>(1.3)   | 273<br>(5.7)   | 89<br>(1.5)    | 362<br>(3.4)  |
| Missing                           | 0<br>(0)       | 216<br>(22)    | 216<br>(10.7) | 1<br>(0.2)    | 0<br>(0.0)    | 1<br>(0.1)    | 0<br>(0)      | 1<br>(0.1)    | 1<br>(0.1)    | 4<br>(0.4)     | 9<br>(0.9)     | 13<br>(0.6)   | 2<br>(0.2)    | 5<br>(0.5)     | 7<br>(0.4)    | 0<br>(0)      | 0<br>(0)       | 0<br>(0)      | 7<br>(0.2)     | 231<br>(3.9)   | 238<br>(2.2)  |
| Employed (%)                      | 670<br>(65)    | 547<br>(55)    | 1,217<br>(60) | 197<br>(34)   | 303<br>(34)   | 500<br>(34)   | 160<br>(45)   | 279<br>(34)   | 439<br>(37)   | 1,026<br>(98)  | 1,030<br>(99)  | 2,056<br>(99) | 599<br>(65)   | 659<br>(60)    | 1,258<br>(63) | 860<br>(97)   | 966<br>(92)    | 1,826<br>(94) | 3,512<br>(73)  | 3,784<br>(64)  | 7,296<br>(68) |
| Current smoker<br>(%)             | 540<br>(53)    | 49<br>(4.9)    | 589<br>(29)   | 155<br>(27)   | 3<br>(0.3)    | 158<br>(11)   | 225<br>(63)   | 25<br>(3.1)   | 250<br>(21)   | 142<br>(14)    | 0<br>(0)       | 142<br>(6.8)  | 388<br>(42)   | 21<br>(1.9)    | 409<br>(20)   | 208<br>(24)   | 27<br>(2.6)    | 235<br>(12)   | 1,658<br>(35)  | 125<br>(2.1)   | 1,783<br>(17) |
| Hypertension<br>(%)               | 550<br>(54)    | 552<br>(55)    | 1102<br>(54)  | 251<br>(44)   | 517<br>(58)   | 768<br>(52)   | 116<br>(33)   | 392<br>(49)   | 508<br>(44)   | 215<br>(21)    | 127<br>(12)    | 342<br>(17)   | 227<br>(25)   | 274<br>(25)    | 501<br>(25)   | 204<br>(23)   | 319<br>(30)    | 523<br>(27)   | 1,563<br>(33)  | 2,181<br>(37)  | 3,744<br>(35) |
| Known HIV<br>positive (%)         | 189<br>(18)    | 121<br>(12)    | 310<br>(15)   | 186<br>(33)   | 304<br>(34)   | 490<br>(33)   | 73<br>(21)    | 175<br>(22)   | 248<br>(21)   | 5<br>(0.5)     | 4<br>(0.4)     | 9<br>(0.4)    | 9<br>(1.0)    | 6<br>(0.6)     | 15<br>(0.7)   | 67<br>(7.6)   | 171<br>(16)    | 238<br>(12)   | 529<br>(11)    | 781<br>(13)    | 1,310<br>(12) |

40  
41  
42  
43  
44  
45  
46

1  
2

|                                        |                   |                     |                    |                   |                    |                    |                  |                    |                    |                  |                  |                  |                  |                  |                  |                  |                    |                   |                  |                   |                   |
|----------------------------------------|-------------------|---------------------|--------------------|-------------------|--------------------|--------------------|------------------|--------------------|--------------------|------------------|------------------|------------------|------------------|------------------|------------------|------------------|--------------------|-------------------|------------------|-------------------|-------------------|
| 3 Family history of diabetes (%)       | NA                | NA                  | NA                 | 85 (15)           | 161 (18)           | 246 (17)           | 53 (15)          | 134 (17)           | 187 (16)           | 24 (2.3)         | 12 (1.2)         | 36 (1.7)         | 12 (1.3)         | 10 (0.9)         | 22 (1.1)         | 112 (13)         | 213 (20)           | 325 (17)          | 286 (6.0)        | 530 (9.0)         | 816 (7.6)         |
| 5 Body mass index (kg/m <sup>2</sup> ) | 24.2 (20.6-28.5)  | 32.9 (28.5-37.6)    | 28.4 (23-33.9)     | 23 (20.3-26.6)    | 28.6 (24.1-33.2)   | 26 (22.1-31.3)     | 20.6 (18.9-24.1) | 30.1 (25.3-35.9)   | 26.9 (21.1-33.1)   | 21.1 (19.2-23.4) | 19.8 (18.1-21.6) | 20.4 (18.6-22.6) | 20.6 (19-22.3)   | 21.4 (19.6-23.9) | 21 (19.3-23.1)   | 22.2 (20-25)     | 26.9 (23-31.7)     | 24.4 (21.1-28.6)  | 21.7 (19.5-24.9) | 25.5 (20.8-31.9)  | 23.2 (20.1-28.6)  |
| 8 Hip circumference (cm)               | 97.4 (90.0-105.3) | 117.5 (109.0-127.0) | 107.0 (95.7-118.5) | 94.0 (89.0-102.0) | 105.0 (97.0-113.0) | 100.0 (93.0-110.0) | 87.6 (83.3-94.9) | 108.7 (98.5-118.9) | 101.9 (90.1-114.3) | 89.5 (85.6-94.9) | 87.8 (83.4-92.5) | 88.8 (84.5-93.7) | 83.0 (79.0-88.0) | 88.0 (83.0-94.0) | 86.0 (81.0-91.0) | 93.0 (87.4-98.9) | 101.0 (94.0-110.0) | 97.0 (90.0-104.6) | 90.6 (85.0-98.0) | 99.0 (89.0-112.0) | 94.2 (86.6-105.3) |
| 11 Subcutaneous fat (cm)               | 1.4 (0.9-2.0)     | .1 (2.5-3.9)        | 2.2 (1.3-3.2)      | 1.2 (0.7-1.7)     | 2.2 (1.5-3.0)      | 1.7 (1.1-2.7)      | 0.8 (0.5-1.2)    | 2.2 (1.6-2.9)      | 1.7 (0.9-2.6)      | 0.8 (0.6-1.2)    | 0.9 (0.6-1.2)    | 0.9 (0.6-1.2)    | 0.7 (0.5-0.9)    | 1.0 (0.7-1.5)    | 0.8 (0.6-1.2)    | 1.0 (0.7-1.5)    | 2.0 (1.4-2.4)      | 1.5 (1.0-2.1)     | 0.9 (0.6-1.4)    | 1.7 (1.0-2.6)     | 1.2 (0.8-2.1)     |
| 14 Visceral fat (cm)                   | 6.2 (5-7.8)       | 4.7 (3.5-5.9)       | 5.5 (4.2-6.9)      | 6.3 (5.2-7.8)     | 5.9 (4.2-7.3)      | 6.1 (4.6-7.5)      | 5.9 (4.7-7.4)    | 6.7 (4.9-8.5)      | 6.4 (4.9-8.2)      | 4.3 (3.5-5.2)    | 4.3 (3.6-5.1)    | 4.3 (3.5-5.1)    | 4 (3.3-4.8)      | 3.3 (2.8-4.1)    | 3.6 (3-4.5)      | 5 (3.9-6.3)      | 4.6 (3.6-5.8)      | 4.8 (3.7-6)       | 5 (3.9-6.5)      | 4.5 (3.4-6)       | 4.7 (3.6-6.2)     |
| 17 Physical activity categories (%)    |                   |                     |                    |                   |                    |                    |                  |                    |                    |                  |                  |                  |                  |                  |                  |                  |                    |                   |                  |                   |                   |
| 18 Absent                              | 63 (6.2)          | 167 (17)            | 230 (11)           | 106 (19)          | 143 (16)           | 249 (17)           | 3 (0.9)          | 8 (1)              | 11 (1.3)           | 227 (22)         | 110 (11)         | 337 (16)         | 64 (7.1)         | 154 (14)         | 218 (11)         | 6 (0.7)          | 19 (1.8)           | 25 (1.3)          | 469 (9.8)        | 601 (10)          | 1,070 (10)        |
| 20 Sufficient                          | 134 (13)          | 283 (28)            | 417 (21)           | 21 (3.7)          | 58 (6.5)           | 79 (5.4)           | 16 (4.5)         | 27 (3.3)           | 134 (6.9)          | 37 (3.5)         | 34 (3.3)         | 71 (3.4)         | 35 (3.9)         | 59 (5.4)         | 94 (4.7)         | 41 (4.6)         | 93 (8.8)           | 134 (6.9)         | 284 (5.9)        | 554 (9.4)         | 838 (7.9)         |
| 22 Sufficient                          | 828 (81)          | 552 (55)            | 1,380 (68)         | 443 (78)          | 686 (77)           | 1,129 (78)         | 334 (95)         | 776 (96)           | 1,780 (92)         | 781 (75)         | 895 (86)         | 1,676 (80)       | 807 (89)         | 874 (80)         | 1,681 (84)       | 839 (95)         | 941 (89)           | 1,780 (92)        | 4,032 (84)       | 4,724 (80)        | 8,756 (82)        |

24 Continuous variables are summarised as medians and interquartile ranges and categorical variables as n (%); NA-not applicable

25  
26  
27  
28  
29  
30  
31  
32  
33  
34  
35  
36  
37  
38  
39  
40  
41  
42  
43  
44  
45  
46

Table S2. Diabetes care cascade by study site

|                                      | Soweto       |               |             |       | Agincourt     |               |               |      | Dikgale       |              |               |       | Nanoro        |               |               |       | Navrongo      |               |               |       | Nairobi       |               |              |       |
|--------------------------------------|--------------|---------------|-------------|-------|---------------|---------------|---------------|------|---------------|--------------|---------------|-------|---------------|---------------|---------------|-------|---------------|---------------|---------------|-------|---------------|---------------|--------------|-------|
|                                      | T            | M             | W           | p     | T             | M             | W             | p    | T             | M            | W             | p     | T             | M             | W             | p     | T             | M             | W             | p     | T             | M             | W            | p     |
| Sample size                          | 2,027        | 1,025         | 1,002       |       | 1,465         | 573           | 892           |      | 1,168         | 356          | 812           |       | 2,084         | 1,045         | 1,039         |       | 2,014         | 923           | 1,091         |       | 1,942         | 886           | 1,056        |       |
| Diabetes present (n)                 | 191          | 72            | 119         |       | 92            | 40            | 52            |      | 105           | 28           | 77            |       | 71            | 50            | 21            |       | 23            | 11            | 12            |       | 131           | 37            | 94           |       |
| Crude diabetes prevalence (%)        | 9.4 (8.2-11) | 7.0 (5.5-8.8) | 12 (9.9-14) |       | 6.3 (5.1-7.6) | 7.0 (5.0-9.4) | 5.8 (4.4-7.6) |      | 9.0 (7.4-11)  | 7.9 (5.3-11) | 9.5 (7.6-12)  |       | 3.4 (2.7-4.3) | 4.8 (3.6-6.3) | 2.0 (1.3-3.1) |       | 1.1 (0.7-1.7) | 1.2 (0.6-2.1) | 1.1 (0.6-1.9) |       | 6.8 (5.7-8.0) | 4.2 (3.0-5.7) | 8.9 (7.3-11) |       |
| Age-adjusted diabetes prevalence (%) | 9.0 (7.8-10) | 6.3 (4.9-7.9) | 12 (9.7-14) | <0.01 | 5.3 (4.1-6.4) | 5.7 (4.0-8.1) | 5.0 (3.6-6.8) | 0.56 | 7.4 (6.0-8.9) | 7.2 (4.6-11) | 7.5 (5.8-9.6) | 0.86  | 3.3 (2.5-4.0) | 4.7 (3.5-6.3) | 1.8 (1.1-2.8) | <0.01 | 1.3 (0.7-1.9) | 1.3 (0.6-2.4) | 1.3 (0.6-2.5) | >0.99 | 6.7 (5.6-7.8) | 4.1 (2.9-5.7) | 9.1 (7.3-11) | <0.01 |
| Aware of having diabetes (n)         | 120          | 51            | 69          |       | 55            | 22            | 33            |      | 61            | 16           | 45            |       | 18            | 16            | 2             |       | 15            | 8             | 7             |       | 59            | 17            | 42           |       |
| Aware of having diabetes (%)         | 63 (56-70)   | 71 (59-81)    | 58 (49-67)  | 0.08  | 60 (49-70)    | 55 (39-71)    | 64 (50-76)    | 0.41 | 58 (48-68)    | 57 (37-76)   | 58 (47-70)    | 0.90  | 25 (16-37)    | 32 (20-47)    | 9.5 (1.2-30)  | 0.05  | 65 (43-84)    | 73 (39-94)    | 58 (28-85)    | 0.47  | 45 (36-54)    | 46 (30-63)    | 45 (34-55)   | 0.90  |
| Reporting treatment for diabetes (n) | NA           | NA            | NA          |       | 41            | 18            | 23            |      | 54            | 11           | 43            |       | 4             | 3             | 1             |       | 7             | 4             | 3             |       | 46            | 14            | 32           |       |
| Reporting treatment for diabetes (%) | NA           | NA            | NA          |       | 75 (61-85)    | 82 (60-95)    | 70 (51-84)    | 0.31 | 89 (78-95)    | 69 (41-89)   | 96 (85-100)   | <0.01 | 22 (6.4-48)   | 19 (4-46)     | 50 (1.3-99)   | 0.32  | 47 (21-73)    | 50 (16-84)    | 43 (9.9-82)   | 0.78  | 78 (65-88)    | 82 (57-96)    | 76 (61-88)   | 0.60  |
| Diabetes controlled (n)              | NA           | NA            | NA          |       | 13            | 5             | 8             |      | 25            | 4            | 21            |       | 2             | 1             | 1             |       | 4             | 3             | 1             |       | 14            | 6             | 8            |       |
| Diabetes controlled (%)              | NA           | NA            | NA          |       | 32 (18-48)    | 28 (9.7-54)   | 35 (16-57)    | 0.63 | 46 (33-60)    | 36 (11-69)   | 49 (33-65)    | 0.46  | 50 (6.8-93)   | 33 (0.8-91)   | 100 (-)       | 0.68  | 57 (18-90)    | 75 (19-99)    | 33 (0.8-91)   | 0.27  | 30 (18-46)    | 43 (18-71)    | 25 (12-43)   | 0.23  |

T: total, M:men, W:women; prevalences are given as estimates and 95% confidence intervals. p value for men vs women and calculated using chi-squared or Fisher's exact test. NA-not applicable as these data were not collected

**Table S3. Factors associated with odds of having diabetes across three sub-Saharan African sites with high HIV prevalence (Agincourt, Dikgale & Nairobi)<sup>1</sup>**

|                                     | Odds ratio | 95% confidence interval | p value |
|-------------------------------------|------------|-------------------------|---------|
| Age                                 | 1.1        | 1.0-1.1                 | <0.01   |
| <b>Sex</b>                          |            |                         |         |
| Women                               | reference  |                         |         |
| Men                                 | 0.8        | 0.5-1.2                 | 0.21    |
| <b>Marital status</b>               |            |                         |         |
| Currently married or cohabitating   | reference  |                         |         |
| Never married or cohabitating       | 1.2        | 0.8-1.8                 | 0.37    |
| Previously married                  | 1.0        | 0.8-1.4                 | 0.91    |
| <b>Educational attainment</b>       |            |                         |         |
| No formal education                 | reference  |                         |         |
| Primary education                   | 1.5        | 1.0-2.2                 | 0.07    |
| Secondary education                 | 1.2        | 0.8-1.9                 | 0.44    |
| Tertiary education                  | 1.2        | 0.6-2.6                 | 0.60    |
| <b>Employment status</b>            |            |                         |         |
| Unemployed                          | reference  |                         |         |
| Employed                            | 1.2        | 0.9-1.6                 | 0.19    |
| <b>Smoking status</b>               |            |                         |         |
| No history of smoking               | reference  |                         |         |
| Current smoker                      | 0.6        | 0.4-1.1                 | 0.08    |
| <b>History of hypertension</b>      |            |                         |         |
| No                                  | reference  |                         |         |
| Yes                                 | 2.0        | 1.5-2.6                 | <0.01   |
| <b>HIV status</b>                   |            |                         |         |
| Negative                            | reference  |                         |         |
| Positive                            | 0.5        | 0.4-0.8                 | <0.01   |
| <b>Family history of diabetes</b>   |            |                         |         |
| No                                  | reference  |                         |         |
| Yes                                 | 3.6        | 2.8-4.7                 | <0.01   |
| <b>Physical activity categories</b> |            |                         |         |
| Absent                              | reference  |                         |         |
| Insufficient                        | 1.4        | 0.7-3.0                 | 0.33    |
| Sufficient                          | 1.1        | 0.6-2.0                 | 0.73    |
| Hip circumference                   | 1.0        | 1.0-1.0                 | <0.01   |
| Visceral fat                        | 1.2        | 1.1-1.2                 | <0.01   |
| Subcutaneous fat                    | 1.3        | 1.1-1.4                 | <0.01   |

<sup>1</sup>3929 participants were included in the analysis



**Table S4. Factors associated with odds of having diabetes across two sub-Saharan African sites with low HIV prevalence (Navrongo & Nanoro)<sup>1</sup>**

|                                     | Odds ratio | 95% confidence interval | p value |
|-------------------------------------|------------|-------------------------|---------|
| Age                                 | 1.0        | 1.0-1.1                 | 0.18    |
| <b>Sex</b>                          |            |                         |         |
| Women                               | reference  |                         |         |
| Men                                 | 1.9        | 1.1-3.3                 | 0.03    |
| <b>Marital status</b>               |            |                         |         |
| Currently married or cohabitating   | reference  |                         |         |
| Never married or cohabitating       | 1.8        | 0.2-14.2                | 0.58    |
| Previously married                  | 1.2        | 0.6-2.3                 | 0.68    |
| <b>Educational attainment</b>       |            |                         |         |
| No formal education                 | reference  |                         |         |
| Primary education                   | 0.5        | 0.2-1.2                 | 0.12    |
| Secondary education                 | 0.9        | 0.4-2.5                 | 0.91    |
| Tertiary education                  | 3.7        | 1.0-13.9                | 0.05    |
| <b>Employment status</b>            |            |                         |         |
| Unemployed                          | reference  |                         |         |
| Employed                            | 1.8        | 0.8-3.9                 | 0.13    |
| <b>Smoking status</b>               |            |                         |         |
| No history of smoking               | reference  |                         |         |
| Current smoker                      | 0.9        | 0.3-2.6                 | 0.79    |
| <b>History of hypertension</b>      |            |                         |         |
| No                                  | reference  |                         |         |
| Yes                                 | 1.2        | 0.7-2.1                 | 0.50    |
| <b>HIV status</b>                   |            |                         |         |
| Negative                            | reference  |                         |         |
| Positive                            | 1.7        | 0.2-13.5                | 0.63    |
| <b>Family history of diabetes</b>   |            |                         |         |
| No                                  | reference  |                         |         |
| Yes                                 | 10.4       | 4.3-25.4                | <0.01   |
| <b>Physical activity categories</b> |            |                         |         |
| Absent                              | reference  |                         |         |
| Insufficient                        | 0.5        | 0.1-1.7                 | 0.23    |
| Sufficient                          | 0.5        | 0.3-0.8                 | 0.01    |
| <b>Anthropometric measures</b>      |            |                         |         |
| Hip circumference                   | 1.0        | 1.0-1.1                 | 0.02    |
| Visceral fat                        | 1.2        | 1.0-1.4                 | 0.14    |
| Subcutaneous fat                    | 1.1        | 0.7-1.9                 | 0.72    |

<sup>1</sup>3496 participants were included in the analysis

**Table S5. Factors associated with awareness in high HIV prevalence sites (Agincourt, Dikgale, Nairobi & Soweto)<sup>1</sup>**

|                                   | Odds Ratio | 95% confidence interval | p value |
|-----------------------------------|------------|-------------------------|---------|
| Age                               | 1.0        | 1.0-1.1                 | 0.09    |
| <b>Sex</b>                        |            |                         |         |
| Women                             | reference  |                         |         |
| Men                               | 1.0        | 0.6-1.6                 | 0.85    |
| <b>Marital status</b>             |            |                         |         |
| Currently married or cohabitating | reference  |                         |         |
| Never married or cohabitating     | 1.0        | 0.5-2.1                 | 0.93    |
| Previously married                | 0.9        | 0.5-1.4                 | 0.60    |
| <b>Educational attainment</b>     |            |                         |         |
| No formal education               | reference  |                         |         |
| Primary education                 | 1.1        | 0.5-2.3                 | 0.86    |
| Secondary education               | 1.4        | 0.7-3.2                 | 0.37    |
| Tertiary education                | 1.2        | 0.4-3.9                 | 0.79    |
| <b>Employment status</b>          |            |                         |         |
| Unemployed                        | reference  |                         |         |
| Employed                          | 0.8        | 0.5-1.2                 | 0.20    |
| <b>History of hypertension</b>    |            |                         |         |
| No                                | reference  |                         |         |
| Yes                               | 1.9        | 1.2-2.9                 | 0.01    |
| <b>HIV status</b>                 |            |                         |         |
| Negative                          | reference  |                         |         |
| Positive                          | 2.1        | 1.1-4.0                 | 0.03    |
| Body mass index                   | 1.0        | 0.9-1.0                 | 0.17    |

<sup>1</sup>397 participants were included in the analysis

STROBE Statement—Checklist of items that should be included in reports of *cross-sectional studies*

|                              | Item No                                                                            | Recommendation                                                                                                                                                                                    | Page No          |
|------------------------------|------------------------------------------------------------------------------------|---------------------------------------------------------------------------------------------------------------------------------------------------------------------------------------------------|------------------|
| <b>Title and abstract</b>    | 1                                                                                  | (a) Indicate the study's design with a commonly used term in the title or the abstract                                                                                                            | 3                |
|                              |                                                                                    | (b) Provide in the abstract an informative and balanced summary of what was done and what was found                                                                                               | 3-4              |
| <b>Introduction</b>          |                                                                                    |                                                                                                                                                                                                   |                  |
| Background/rationale         | 2                                                                                  | Explain the scientific background and rationale for the investigation being reported                                                                                                              | 6-7              |
| Objectives                   | 3                                                                                  | State specific objectives, including any prespecified hypotheses                                                                                                                                  | 7                |
| <b>Methods</b>               |                                                                                    |                                                                                                                                                                                                   |                  |
| Study design                 | 4                                                                                  | Present key elements of study design early in the paper                                                                                                                                           | 7-8              |
| Setting                      | 5                                                                                  | Describe the setting, locations, and relevant dates, including periods of recruitment, exposure, follow-up, and data collection                                                                   | 7-8              |
| Participants                 | 6                                                                                  | (a) Give the eligibility criteria, and the sources and methods of selection of participants                                                                                                       | 7-8              |
| Variables                    | 7                                                                                  | Clearly define all outcomes, exposures, predictors, potential confounders, and effect modifiers. Give diagnostic criteria, if applicable                                                          | 8-10             |
| Data sources/<br>measurement | 8*                                                                                 | For each variable of interest, give sources of data and details of methods of assessment (measurement). Describe comparability of assessment methods if there is more than one group              | 8-10             |
| Bias                         | 9                                                                                  | Describe any efforts to address potential sources of bias                                                                                                                                         | 10-11            |
| Study size                   | 10                                                                                 | Explain how the study size was arrived at                                                                                                                                                         | 7-8              |
| Quantitative variables       | 11                                                                                 | Explain how quantitative variables were handled in the analyses. If applicable, describe which groupings were chosen and why                                                                      | 10-12            |
| Statistical methods          | 12                                                                                 | (a) Describe all statistical methods, including those used to control for confounding                                                                                                             | 10-12            |
|                              |                                                                                    | (b) Describe any methods used to examine subgroups and interactions                                                                                                                               | 10-12            |
|                              | (c) Explain how missing data were addressed                                        | 12                                                                                                                                                                                                |                  |
|                              | (d) If applicable, describe analytical methods taking account of sampling strategy | n/a                                                                                                                                                                                               |                  |
|                              | (e) Describe any sensitivity analyses                                              | 11-12                                                                                                                                                                                             |                  |
| <b>Results</b>               |                                                                                    |                                                                                                                                                                                                   |                  |
| Participants                 | 13*                                                                                | (a) Report numbers of individuals at each stage of study—eg numbers potentially eligible, examined for eligibility, confirmed eligible, included in the study, completing follow-up, and analysed | 12,15            |
|                              |                                                                                    | (b) Give reasons for non-participation at each stage                                                                                                                                              | 15               |
|                              |                                                                                    | (c) Consider use of a flow diagram                                                                                                                                                                |                  |
| Descriptive data             | 14*                                                                                | (a) Give characteristics of study participants (eg demographic, clinical, social) and information on exposures and potential confounders                                                          | 12-14            |
|                              |                                                                                    | (b) Indicate number of participants with missing data for each variable of interest                                                                                                               | 13-15,<br>17, 18 |
| Outcome data                 | 15*                                                                                | Report numbers of outcome events or summary measures                                                                                                                                              | 15               |

|    |                          |    |                                                                                                                                                                                                              |
|----|--------------------------|----|--------------------------------------------------------------------------------------------------------------------------------------------------------------------------------------------------------------|
| 1  |                          |    |                                                                                                                                                                                                              |
| 2  | Main results             | 16 | (a) Give unadjusted estimates and, if applicable, confounder-adjusted estimates and their precision (eg, 95% confidence interval). Make clear which confounders were adjusted for and why they were included |
| 3  |                          |    |                                                                                                                                                                                                              |
| 4  |                          |    |                                                                                                                                                                                                              |
| 5  |                          |    |                                                                                                                                                                                                              |
| 6  |                          |    | (b) Report category boundaries when continuous variables were categorized                                                                                                                                    |
| 7  |                          |    |                                                                                                                                                                                                              |
| 8  |                          |    | (c) If relevant, consider translating estimates of relative risk into absolute risk for a meaningful time period                                                                                             |
| 9  |                          |    |                                                                                                                                                                                                              |
| 10 |                          |    |                                                                                                                                                                                                              |
| 11 | Other analyses           | 17 | Report other analyses done—eg analyses of subgroups and interactions, and sensitivity analyses                                                                                                               |
| 12 |                          |    |                                                                                                                                                                                                              |
| 13 |                          |    |                                                                                                                                                                                                              |
| 14 | <b>Discussion</b>        |    |                                                                                                                                                                                                              |
| 15 | Key results              | 18 | Summarise key results with reference to study objectives                                                                                                                                                     |
| 16 | Limitations              | 19 | Discuss limitations of the study, taking into account sources of potential bias or imprecision. Discuss both direction and magnitude of any potential bias                                                   |
| 17 |                          |    |                                                                                                                                                                                                              |
| 18 |                          |    |                                                                                                                                                                                                              |
| 19 |                          |    |                                                                                                                                                                                                              |
| 20 | Interpretation           | 20 | Give a cautious overall interpretation of results considering objectives, limitations, multiplicity of analyses, results from similar studies, and other relevant evidence                                   |
| 21 |                          |    |                                                                                                                                                                                                              |
| 22 |                          |    |                                                                                                                                                                                                              |
| 23 |                          |    |                                                                                                                                                                                                              |
| 24 | Generalisability         | 21 | Discuss the generalisability (external validity) of the study results                                                                                                                                        |
| 25 |                          |    |                                                                                                                                                                                                              |
| 26 | <b>Other information</b> |    |                                                                                                                                                                                                              |
| 27 | Funding                  | 22 | Give the source of funding and the role of the funders for the present study and, if applicable, for the original study on which the present article is based                                                |
| 28 |                          |    |                                                                                                                                                                                                              |
| 29 |                          |    |                                                                                                                                                                                                              |
| 30 |                          |    |                                                                                                                                                                                                              |

\*Give information separately for exposed and unexposed groups.

**Note:** An Explanation and Elaboration article discusses each checklist item and gives methodological background and published examples of transparent reporting. The STROBE checklist is best used in conjunction with this article (freely available on the Web sites of PLoS Medicine at <http://www.plosmedicine.org/>, Annals of Internal Medicine at <http://www.annals.org/>, and Epidemiology at <http://www.epidem.com/>). Information on the STROBE Initiative is available at [www.strobe-statement.org](http://www.strobe-statement.org).

# BMJ Open

## Diabetes care cascade and associated factors in 10,700 middle-aged adults in four sub-Saharan African countries-a cross-sectional study

|                               |                                                                                                                                                                                                                                                                                                                                                                                                                                                                                                                                                                                                                                                                                                                                                                                                                                                                                                                                                                                                                                                                                                                                                                                                                                                                                                                                                                                                                                                                                                                                                                                                                                                                                                                                                                                                                                                                                                                                                                                                                                                                                                                                                                                                                                                                                                           |
|-------------------------------|-----------------------------------------------------------------------------------------------------------------------------------------------------------------------------------------------------------------------------------------------------------------------------------------------------------------------------------------------------------------------------------------------------------------------------------------------------------------------------------------------------------------------------------------------------------------------------------------------------------------------------------------------------------------------------------------------------------------------------------------------------------------------------------------------------------------------------------------------------------------------------------------------------------------------------------------------------------------------------------------------------------------------------------------------------------------------------------------------------------------------------------------------------------------------------------------------------------------------------------------------------------------------------------------------------------------------------------------------------------------------------------------------------------------------------------------------------------------------------------------------------------------------------------------------------------------------------------------------------------------------------------------------------------------------------------------------------------------------------------------------------------------------------------------------------------------------------------------------------------------------------------------------------------------------------------------------------------------------------------------------------------------------------------------------------------------------------------------------------------------------------------------------------------------------------------------------------------------------------------------------------------------------------------------------------------|
| Journal:                      | <i>BMJ Open</i>                                                                                                                                                                                                                                                                                                                                                                                                                                                                                                                                                                                                                                                                                                                                                                                                                                                                                                                                                                                                                                                                                                                                                                                                                                                                                                                                                                                                                                                                                                                                                                                                                                                                                                                                                                                                                                                                                                                                                                                                                                                                                                                                                                                                                                                                                           |
| Manuscript ID                 | bmjopen-2022-069193.R2                                                                                                                                                                                                                                                                                                                                                                                                                                                                                                                                                                                                                                                                                                                                                                                                                                                                                                                                                                                                                                                                                                                                                                                                                                                                                                                                                                                                                                                                                                                                                                                                                                                                                                                                                                                                                                                                                                                                                                                                                                                                                                                                                                                                                                                                                    |
| Article Type:                 | Original research                                                                                                                                                                                                                                                                                                                                                                                                                                                                                                                                                                                                                                                                                                                                                                                                                                                                                                                                                                                                                                                                                                                                                                                                                                                                                                                                                                                                                                                                                                                                                                                                                                                                                                                                                                                                                                                                                                                                                                                                                                                                                                                                                                                                                                                                                         |
| Date Submitted by the Author: | 11-Apr-2023                                                                                                                                                                                                                                                                                                                                                                                                                                                                                                                                                                                                                                                                                                                                                                                                                                                                                                                                                                                                                                                                                                                                                                                                                                                                                                                                                                                                                                                                                                                                                                                                                                                                                                                                                                                                                                                                                                                                                                                                                                                                                                                                                                                                                                                                                               |
| Complete List of Authors:     | <p>Wade, Alisha N.; University of the Witwatersrand Johannesburg Faculty of Health Sciences, MRC/Wits Rural Public Health and Health Transitions Research Unit, School of Public Health</p> <p>Maposa, Innocent; University of the Witwatersrand Johannesburg Faculty of Health Sciences, Division of Epidemiology and Biostatistics</p> <p>Agongo, Godfred; Navrongo Health Research Centre; C K Tedam University of Technology and Applied Sciences, Department of Biochemistry and Forensic Science, School of Chemical and Biochemical Sciences</p> <p>Asiki, G; African Population and Health Research Center, Health and Systems for Health Unit</p> <p>Boua, Palwende; Institut de Recherche en Sciences de la Sante, Clinical Research Unit of Nanoro</p> <p>Choma, Solomon SR; University of Limpopo, Department of Pathology and Medical Sciences, DIMAMO Population Health Research Centre</p> <p>Gómez-Olivé, F. Xavier; University of the Witwatersrand Johannesburg Faculty of Health Sciences, MRC/Wits Rural Public Health and Health Transitions Research Unit, School of Public Health</p> <p>Maimela, Eric; University of Limpopo, Department of Public Health</p> <p>Micklesfield, Lisa; University of the Witwatersrand Johannesburg Faculty of Health Sciences, South African MRC Developmental Pathways for Health Research Unit, School of Clinical Medicine</p> <p>Mohamed, Shukri; African Population and Health Research Center, Health and Systems for Health Unit</p> <p>Nonterah, Engelbert ; Navrongo Health Research Centre</p> <p>Norris, Shane; University of the Witwatersrand Johannesburg Faculty of Health Sciences, South African MRC Developmental Pathways for Health Research Unit, School of Clinical Medicine; University of Southampton, Global Health Research Institute, School of Health and Human Development</p> <p>Sorgho, Hermann ; Institut de Recherche en Sciences de la Sante, Clinical Research Unit of Nanoro</p> <p>Ramsay, Michele; University of the Witwatersrand Johannesburg Faculty of Health Sciences, Sydney Brenner Institute for Molecular Bioscience</p> <p>Crowther, Nigel John; University of the Witwatersrand Johannesburg Faculty of Health Sciences, Department of Chemical Pathology, National Health Laboratory Service</p> |
| <b>Primary Subject            | Diabetes and endocrinology                                                                                                                                                                                                                                                                                                                                                                                                                                                                                                                                                                                                                                                                                                                                                                                                                                                                                                                                                                                                                                                                                                                                                                                                                                                                                                                                                                                                                                                                                                                                                                                                                                                                                                                                                                                                                                                                                                                                                                                                                                                                                                                                                                                                                                                                                |

1  
2  
3  
4  
5  
6  
7  
8  
9  
10  
11  
12  
13  
14  
15  
16  
17  
18  
19  
20  
21  
22  
23  
24  
25  
26  
27  
28  
29  
30  
31  
32  
33  
34  
35  
36  
37  
38  
39  
40  
41  
42  
43  
44  
45  
46  
47  
48  
49  
50  
51  
52  
53  
54  
55  
56  
57  
58  
59  
60

|                            |                                                                                                                                         |
|----------------------------|-----------------------------------------------------------------------------------------------------------------------------------------|
| Heading                    |                                                                                                                                         |
| Secondary Subject Heading: | Global health                                                                                                                           |
| Keywords:                  | General diabetes < DIABETES & ENDOCRINOLOGY, PUBLIC HEALTH, International health services < HEALTH SERVICES ADMINISTRATION & MANAGEMENT |
|                            |                                                                                                                                         |





I, the Submitting Author has the right to grant and does grant on behalf of all authors of the Work (as defined in the below author licence), an exclusive licence and/or a non-exclusive licence for contributions from authors who are: i) UK Crown employees; ii) where BMJ has agreed a CC-BY licence shall apply, and/or iii) in accordance with the terms applicable for US Federal Government officers or employees acting as part of their official duties; on a worldwide, perpetual, irrevocable, royalty-free basis to BMJ Publishing Group Ltd ("BMJ") its licensees and where the relevant Journal is co-owned by BMJ to the co-owners of the Journal, to publish the Work in this journal and any other BMJ products and to exploit all rights, as set out in our [licence](#).

The Submitting Author accepts and understands that any supply made under these terms is made by BMJ to the Submitting Author unless you are acting as an employee on behalf of your employer or a postgraduate student of an affiliated institution which is paying any applicable article publishing charge ("APC") for Open Access articles. Where the Submitting Author wishes to make the Work available on an Open Access basis (and intends to pay the relevant APC), the terms of reuse of such Open Access shall be governed by a Creative Commons licence – details of these licences and which [Creative Commons](#) licence will apply to this Work are set out in our licence referred to above.

Other than as permitted in any relevant BMJ Author's Self Archiving Policies, I confirm this Work has not been accepted for publication elsewhere, is not being considered for publication elsewhere and does not duplicate material already published. I confirm all authors consent to publication of this Work and authorise the granting of this licence.

1  
2  
3 Full title: Diabetes care cascade and associated factors in 10,700 middle-aged adults  
4 in four sub-Saharan African countries - a cross-sectional study  
5  
6  
7  
8  
9

10 Running title: Diabetes care cascade in sub-Saharan Africa  
11  
12  
13  
14

15 Authors: Alisha N. Wade DPhil<sup>a</sup>, Innocent Maposa PhD<sup>b</sup>, Godfred Agongo PhD<sup>c,d</sup>,  
16 Gershim Asiki PhD<sup>e</sup>, Palwende Romuald Boua PhD<sup>f</sup>, Solomon Choma MSc<sup>g</sup>, F.  
17 Xavier Gómez-Olivé PhD<sup>a</sup>, Eric Maimela PhD<sup>h</sup>, Lisa K. Micklesfield PhD<sup>i</sup>, Shukri F.  
18 Mohamed PhD<sup>e</sup>, Engelbert A. Nonterah PhD<sup>c</sup>, Shane A. Norris PhD<sup>i,j</sup>, Hermann  
19 Sorgho PhD<sup>f</sup>, Michèle Ramsay PhD<sup>k</sup>, Nigel J. Crowther PhD<sup>l</sup> as members of AWI-  
20 Gen and the H3Africa Consortium  
21  
22  
23  
24  
25  
26  
27  
28  
29

30 Author affiliations: <sup>a</sup>MRC/Wits Rural Public Health and Health Transitions Research  
31 Unit, School of Public Health, Faculty of Health Sciences, University of the  
32 Witwatersrand, 27 St. Andrew's Road, Parktown, Johannesburg 2193, South Africa;  
33  
34 <sup>b</sup>Division of Epidemiology and Biostatistics, School of Public Health, Faculty of  
35 Health Sciences, University of the Witwatersrand, 27 St. Andrew's Road, Parktown,  
36 Johannesburg 2193, South Africa; <sup>c</sup>Navrongo Health Research Centre, Ghana  
37 Health Service, Post Office Box 114, Navrongo, Upper East Region, Ghana;  
38  
39 <sup>d</sup>Department of Biochemistry and Forensic Science, School of Chemical and  
40 Biochemical Sciences, C. K. Tedam University of Technology and Applied Sciences,  
41 Box 24 Navrongo, Ghana; <sup>e</sup>Health and Systems for Health Unit, P.O. Box 10787-  
42 00100, African Population and Health Research Centre, Nairobi, Kenya; <sup>f</sup>Clinical  
43 Research Unit of Nanoro, Institut de Recherche en Sciences de la Santé, Nanoro,  
44 Burkina Faso; <sup>g</sup>Department of Pathology and Medical Sciences, DIMAMO Population  
45 Health Research Centre, University of Limpopo, Private Bag X1106 Sovenga 0727,  
46  
47  
48  
49  
50  
51  
52  
53  
54  
55  
56  
57  
58  
59  
60



1  
2  
3 South Africa; <sup>h</sup>Department of Public Health, University of Limpopo, 1<sup>st</sup> University  
4 Road, Sovenga, 0727, South Africa; <sup>i</sup>South African MRC Developmental Pathways  
5 for Health Research Unit, School of Clinical Medicine, Faculty of Health Sciences,  
6 University of the Witwatersrand, 7 York Road, Parktown, Johannesburg 2193, South  
7 Africa; <sup>j</sup>Global Health Research Institute, School of Health and Human Development,  
8 University of Southampton, University Road, Southampton SO17 1BJ, United  
9 Kingdom; <sup>k</sup>Sydney Brenner Institute for Molecular Bioscience, Faculty of Health  
10 Sciences, University of the Witwatersrand, 9 Jubilee Road, Parktown, Johannesburg  
11 2193, South Africa; <sup>l</sup>Department of Chemical Pathology, National Health Laboratory  
12 Service, Faculty of Health Sciences, University of the Witwatersrand, 7 York Road,  
13 Parktown, Johannesburg 2193, South Africa  
14  
15  
16  
17  
18  
19  
20  
21  
22  
23  
24  
25  
26  
27  
28  
29  
30  
31

32 Corresponding author: Alisha N. Wade DPhil, MRC/Wits Rural Public Health and  
33 Health Transitions Research Unit, School of Public Health, University of the  
34 Witwatersrand, 27 St. Andrew's Road, Parktown, Johannesburg, 2193, South Africa.  
35  
36  
37  
38  
39 Tel:+27 11 717 2511; Fax:+27 86 765 2753; Email: alisha.wade@wits.ac.za  
40  
41  
42  
43  
44

45 Word counts:

46  
47  
48 Abstract: 277 words  
49

50  
51 Main text: 3771 words  
52  
53  
54  
55  
56  
57  
58  
59  
60

## Abstract

**Objectives:** We investigated progression through the care cascade and associated factors for people with diabetes in sub-Saharan Africa to identify attrition stages that may be most appropriate for targeted intervention.

**Design:** Cross-sectional study.

**Setting:** Community-based study in four sub-Saharan African countries.

**Participants:** 10 700 individuals, aged 40-60 years.

**Primary and secondary outcome measures:** The primary outcome measure was the diabetes cascade of care defined as the age-adjusted diabetes prevalence (self-report of diabetes, fasting plasma glucose [FPG]  $\geq 7$  mmol/l or random plasma glucose  $\geq 11.1$  mmol/l) and proportions of those who reported awareness of having diabetes, ever having received treatment for diabetes and those who achieved glycaemic control (FPG  $< 7.2$  mmol/l). Secondary outcome measures were factors associated with having diabetes and being aware of the diagnosis.

**Results:** Diabetes prevalence was 5.5% (95%CI 4.4-6.5%). Approximately half of those with diabetes were aware (54%; 95%CI 50-58%); 73% (95%CI 67-79%) of aware individuals reported ever having received treatment. However, only 38% (95%CI 30-46%) of those ever having received treatment were adequately controlled. Increasing age (OR 1.1; 95%CI 1.0-1.1), urban residence (OR 2.3; 95%CI 1.6-3.5), hypertension (OR 1.9; 95%CI 1.5-2.4), family history of diabetes (OR 3.9;

1  
2  
3 95%CI 3.0-5.1), and measures of central adiposity were associated with higher odds  
4  
5 of having diabetes. Increasing age (OR 1.1; 95%CI 1.0-1.1), semi-rural residence  
6  
7 (OR 2.5; 95%CI 1.1-5.7), secondary education (OR 2.4; 95%CI 1.2-4.9),  
8  
9 hypertension (OR 1.6; 95%CI 1.0-2.4), and known HIV positivity (OR 2.3; 95%CI 1.2-  
10  
11 4.4) were associated with greater likelihood of awareness of having diabetes.  
12  
13  
14  
15  
16

17 **Conclusions:** There is attrition at each stage of the diabetes care cascade in sub-  
18  
19 Saharan Africa. Public health strategies should target improving diagnosis in high-  
20  
21 risk individuals and intensifying therapy in individuals treated for diabetes.  
22  
23  
24  
25

26 **Keywords:** diabetes mellitus, sub-Saharan Africa  
27  
28  
29  
30  
31  
32  
33  
34  
35  
36  
37  
38  
39  
40  
41  
42  
43  
44  
45  
46  
47  
48  
49  
50  
51  
52  
53  
54  
55  
56  
57  
58  
59  
60

### Strength and limitations of this study

- We present harmonised primary data on the diabetes care cascade from multiple countries in sub-Saharan Africa
- Our study included over 10,000 participants from eastern, western and southern Africa
- We did not perform glucose tolerance testing and therefore may not have identified individuals who met criteria for diabetes diagnosis only after a glucose challenge
- Glycaemic control was assessed using fasting plasma glucose which provides a point evaluation and may not be reflective of control over a longer period of time

## INTRODUCTION

Diabetes prevalence in adults in sub-Saharan Africa (SSA) is projected to increase from 23.6 million in 2021 to 54.9 million people in 2045.[1] Inadequate control of blood sugar and other cardiovascular risk factors will impose an unsustainable burden of diabetes-related complications on already constrained regional health care systems. Existing data suggest that outcomes in individuals in SSA with diabetes are currently suboptimal with over 300,000 diabetes-related deaths before the age of 60 years in 2021,[1] highlighting the need to improve clinical care. Optimisation of diabetes management is contingent on numerous factors including the diagnosis of diabetes, appropriate escalation of therapy and patient adherence to therapeutic interventions, but effective strategies to improve diabetes management in SSA are hampered by a lack of knowledge about the extent of the deficiencies in this care continuum.

The cascade of care model, frequently used to identify deficits in HIV care, may be applied to diabetes to identify opportunities for improved outcomes.[2-4] The elements of the cascade, namely prevalence, awareness, treatment and control reflect aspects of the health care system, including effectiveness of prevention and detection strategies and the ability to implement and escalate therapy as necessary. On an individual level, diabetes awareness in particular is key to the adherence to lifestyle modification and medication that underpin glycaemic control. Evaluation of the diabetes care cascade allows policy makers to assess how well the health care system manages patients with diabetes and to identify areas for targeted interventions, particularly important in the resource-constrained lower and middle-income countries of SSA.

1  
2  
3  
4  
5  
6  
7  
8  
9  
10  
11  
12  
13  
14  
15  
16  
17  
18  
19  
20  
21  
22  
23  
24  
25  
26  
27  
28  
29  
30  
31  
32  
33  
34  
35  
36  
37  
38  
39  
40  
41  
42  
43  
44  
45  
46  
47  
48  
49  
50  
51  
52  
53  
54  
55  
56  
57  
58  
59  
60

Despite the benefits of establishing the diabetes care cascade, there is a paucity of primary data on it in SSA. Studies have often been limited to diabetes prevalence and awareness and conducted in hospital-based populations, introducing selection bias, while multi-country studies that have reported on the entire cascade have meta-analysed data from heterogeneous studies with methodological differences in determining each cascade stage.[2,3] We aimed to evaluate the diabetes cascade of care in four SSA countries, using harmonised data collected across six sites, and performed exploratory analyses of the cascade stratified by sex and study site. We further investigated factors associated with the likelihood of having diabetes and being aware of a diagnosis of diabetes, the first two steps in the cascade.

## **METHODS**

### **Study Setting and Participants**

The AWI-Gen study and participating sites have been described in detail elsewhere.[5,6] In brief, 10,700 individuals were recruited from six sites in SSA in a community-based, cross-sectional study conducted between August 2013 and August 2016. Individuals were eligible for inclusion if they were aged 40-60 years and resided permanently in the study sites. We excluded individuals who were pregnant and, given that one of the broader objectives of the AWI-Gen study was to investigate genomic determinants of cardiometabolic disease, we also excluded individuals who were closely related to an existing participant and who had recently immigrated into the study site. We selected individuals aged 40-60 years as this is a peak time for the development of cardiometabolic disease. Three of the study sites were in South Africa (Soweto, Agincourt and Dikgale), one was in Kenya (Nairobi),

1  
2  
3 one in Ghana (Navrongo) and one in Burkina Faso (Nanoro). Participants were  
4 therefore included from southern, eastern and western Africa. The selected sites  
5 were also on a continuum of urbanisation: Nairobi and Soweto were urban sites,  
6 Agincourt and Dikgale were semi-rural and Nanoro and Navrongo were rural.  
7  
8  
9  
10  
11  
12  
13

14 With the exception of Soweto, each study site is home to a Health and socio-  
15 Demographic Surveillance System (HDSS) which enumerates all residents within the  
16 HDSS on a regular basis, ensuring a well-defined population sampling frame. In  
17 Nairobi, Agincourt, Navrongo and Nanoro, individuals were randomly sampled from  
18 the sampling frame, while in Dikgale, a convenience sampling strategy was  
19 employed. In Soweto, 700 women who were participants in the Study of Women  
20 Entering an Endocrine Transition (SWEET) study[7] and caregivers of the Birth to  
21 Twenty+ cohort[8] were recruited. Additional female and all male participants were  
22 randomly recruited, using a sampling frame which covered the Soweto region.  
23  
24  
25  
26  
27  
28  
29  
30  
31  
32  
33  
34  
35  
36  
37  
38  
39  
40  
41  
42  
43  
44  
45  
46  
47  
48  
49  
50  
51  
52  
53  
54  
55  
56  
57  
58  
59  
60

Where necessary, there was oversampling to ensure equal numbers of women and men.

### **Patient and public involvement**

Prior to the initiation of the AWI-Gen study, an extensive process of community engagement was conducted. This included meetings with civic and traditional leadership structures, household visits and group information sessions to discuss planned research activities. Study results were delivered annually to study participants, communities and community leaders.

### **Data Collection and Definitions**

1  
2  
3 Data were collected by study staff trained on standardised protocols.  
4

5 Sociodemographic data and personal and family medical history were self-reported.  
6

7 Additionally, individuals were considered to have hypertension if the mean systolic  
8 blood pressure of the latter two of three readings at the study visit  $\geq 140$  mmHg or the  
9 mean diastolic pressure  $\geq 90$  mmHg (Omron M6, Omron, Kyoto, Japan).[9]  
10  
11

12 Individuals were classified as HIV positive if they reported a previous diagnosis of  
13 HIV or if they tested positive on the rapid HIV tests that were offered to participants  
14 in South Africa and Kenya (MD HIV 1/2 test [Medical Diagnostech, Cape Town,  
15 South Africa]; One Step anti-HIV1+2 rapid screen test [InTec, Xiamen, China];  
16 Determine rapid test kit [Abbot Pharmaceuticals, Chicago, USA]). Rapid HIV tests  
17 were not offered in Ghana and Burkina Faso due to the low prevalence of HIV in  
18 those countries; individuals in these sites who did not know their HIV status were  
19 classified as HIV negative. Physical activity was assessed using the Global Physical  
20 Activity Questionnaire and occupational, leisure time and travel-related physical  
21 activity variables from this questionnaire were summed to give the total moderate-  
22 vigorous intensity physical activity (MVPA) in minutes per week. Individuals were  
23 classified as having no MVPA (0 minutes/week), insufficient MVPA (1-150  
24 minutes/week) or sufficient MVPA ( $\geq 150$  minutes/week).[10]  
25  
26  
27  
28  
29  
30  
31  
32  
33  
34  
35  
36  
37  
38  
39  
40  
41  
42  
43  
44  
45  
46

47 Standing height was measured with the participant barefoot or in light socks, using a  
48 Harpenden digital stadiometer (Holtain, Wales, UK). Weight was measured with the  
49 participant in light clothing, using a digital Physician Large Dial 200 kg capacity scale  
50 (Kendon Medical, South Africa) and body mass index was calculated as weight in kg  
51 divided by height in metres squared. Using a stretch-resistant measuring tape  
52  
53  
54  
55  
56  
57  
58  
59  
60



1  
2  
3 (SECA, Hamburg, Germany), hip circumference, as a measure of gluteofemoral fat,  
4  
5 was measured around the most protruding part of the buttocks.  
6  
7  
8  
9

10 Visceral and subcutaneous adipose tissue, direct measures of central adiposity  
11 associated with insulin resistance, were measured using abdominal ultrasound  
12 (LOGIQ e ultrasound system [GE Healthcare, CT, USA]). Study staff from all sites  
13 were centrally trained in Johannesburg, South Africa to perform the abdominal  
14 ultrasounds. Visceral adipose thickness was determined by the thickness of the fat  
15 pad between the anterior spine and peritoneal layer at end expiration, while  
16 subcutaneous adipose thickness was the thickness of the fat pad between the skin  
17 and the outer edge of the linea alba.  
18  
19  
20  
21  
22  
23  
24  
25  
26  
27  
28  
29

30 Venous blood was collected at study visits in potassium oxalate/sodium fluoride  
31 tubes and centrifuged immediately after collection, with the supernatant plasma  
32 stored at -80°C until analysis, according to a detailed sample processing protocol  
33 provided to all sites. Analyses for glucose were all performed at a central site, using  
34 colorimetric methods, on the Randox Plus clinical chemistry analyser (Randox, UK)  
35 with a range of 0.36–35 mmol/l and coefficient of variation <2.3%.  
36  
37  
38  
39  
40  
41  
42  
43  
44  
45  
46

47 Diabetes was defined as a previous diagnosis of diabetes by a health care provider  
48 (which could include a doctor, nurse, community health worker or similar person),  
49 ever having received treatment for diabetes, or fasting plasma glucose  $\geq 7$  mmol/l or  
50 random plasma glucose  $\geq 11.1$  mmol/l [11,12] on the sample taken during the study  
51 visit. Samples were considered random if a participant had not fasted overnight or  
52 fasting status could not be confirmed. Participants were considered to be aware of a  
53  
54  
55  
56  
57  
58  
59  
60

1  
2  
3 diagnosis of diabetes if they reported ever having been told by a health care provider  
4 that they had diabetes and were considered to have been treated for diabetes if they  
5 reported ever having received treatment for diabetes (dietary advice and/or glucose  
6 lowering agents) from a health care provider. Individuals were considered to have  
7 their diabetes controlled if fasting glucose was  $<7.2$  mmol/l.[11]  
8  
9  
10  
11  
12  
13  
14  
15  
16

### 17 **Statistical Analysis**

18  
19 Categorical participant characteristics of marital status, highest level of education,  
20 current smoking, known hypertension, known HIV positivity, family history of  
21 diabetes and physical activity category were described using frequencies and  
22 percentages, while medians and interquartile ranges (IQR) were used to describe  
23 continuous characteristics of age, body mass index, hip circumference, visceral fat  
24 and subcutaneous fat. The Mann-Whitney U, chi-squared and Fisher's exact tests  
25 were used to compare continuous and categorical variables respectively between  
26 groups defined by sex to investigate sex-related differences in potential determinants  
27 and groups defined by data missingness status to evaluate for bias between those  
28 who were included and those who were excluded from the analysis due to missing  
29 data.  
30  
31  
32  
33  
34  
35  
36  
37  
38  
39  
40  
41  
42  
43  
44  
45  
46

47 Age-adjusted diabetes prevalence was determined using the United Nations African  
48 population distribution[13] as the reference population structure. The proportion of  
49 those aware of having diabetes was calculated as a percentage of those with  
50 diabetes and similarly, the proportion of those ever receiving treatment for diabetes  
51 was calculated as a percentage of those aware of having diabetes. The proportion of  
52 those who had their diabetes controlled was calculated as a percentage of those  
53  
54  
55  
56  
57  
58  
59  
60

1  
2  
3 who reported ever receiving treatment. The method for interval estimation described  
4 by Tiwari et al.[14] was used to determine the 95% confidence intervals. The Soweto  
5 site was excluded from the latter two stages of the cascade as the 'ever receiving  
6 treatment' variable was not collected.  
7  
8  
9  
10  
11  
12

13  
14 Multivariable logistic regression was used to assess the relationship between the  
15 odds of having diabetes and sociodemographic and clinical characteristics including  
16 urbanicity. Independent variables for inclusion in the logistic regression were  
17 selected based on previous research.[15,16] The Soweto site did not collect data on  
18 family history of diabetes and was therefore not included in this model, as family  
19 history of diabetes has been demonstrated in other settings to be strongly associated  
20 with higher odds of having the condition. Additional multivariable logistic regression  
21 models were also fit, using data from all sites, to investigate associations with  
22 awareness of a diagnosis of diabetes. In the model investigating associations with  
23 odds of having diabetes, we included visceral and subcutaneous fat as direct  
24 assessments of central obesity and hip circumference as a measure of gluteofemoral  
25 fat. In the model investigating associations with awareness, we used body mass  
26 index as the measure of obesity as we thought awareness was more likely to be  
27 associated with a global assessment of obesity rather than individual fat depots. We  
28 were underpowered to assess associations with diabetes treatment and control.  
29  
30  
31  
32  
33  
34  
35  
36  
37  
38  
39  
40  
41  
42  
43  
44  
45  
46  
47  
48  
49  
50

51 Sensitivity analyses were conducted in which associations with having diabetes and  
52 awareness of a diagnosis of diabetes were explored in analyses stratified by HIV  
53 prevalence, with the South African sites and Nairobi classified as high prevalence  
54 sites and Navrongo and Nanoro classified as low prevalence sites.  
55  
56  
57  
58  
59  
60

1  
2  
3  
4  
5 Missing data were handled using pairwise deletion. Analyses were conducted using  
6  
7  
8 Stata v16 (StataCorp, USA).  
9

## 10 11 12 **RESULTS**

### 13 14 **Sample Characteristics**

15  
16 The characteristics of the 10,700 study participants are shown in Supplemental  
17  
18 Table S1. There were 5,892 women (55%), with a median age of 50 years (IQR 45-  
19  
20 55). There was some inter-site variation in sociodemographic variables - while most  
21  
22 55). There was some inter-site variation in sociodemographic variables - while most  
23  
24 participants in the urban and semi-rural sites had some formal education, between  
25  
26 70-80% of participants in the rural sites did not. Smoking prevalence ranged  
27  
28 between 6% and 30% overall, with prevalence several fold higher in men than in  
29  
30 women in all sites. There was a high prevalence of chronic disease with 3,755 (37%)  
31  
32 participants having hypertension and 1,310 (12%) known as being HIV positive,  
33  
34 although inter-site variation was evident, with HIV prevalence being low, for example,  
35  
36 in Nanoro and Navrongo. Family history of diabetes was highest in the urban and  
37  
38 semi-rural areas. Anthropometric measures of obesity and subcutaneous fat were  
39  
40 higher in women in urban and semi-urban areas, while there were no clear sex  
41  
42 differences in Nanoro or Navrongo. Visceral fat was generally similar in both sexes.  
43  
44 The majority of individuals (82%) were undertaking at least 150 minutes of moderate  
45  
46 to vigorous physical activity weekly.  
47  
48  
49  
50  
51  
52  
53  
54  
55  
56  
57  
58  
59  
60

### Missing Outcome Data

No participants had missing data on the diabetes status outcome, while 31 individuals had missing data on the awareness outcome and were slightly older (median age 54 vs 52 years;  $p=0.04$ ), less likely to be employed (32 vs 64%;  $p<0.01$ ) and had a different marital status distribution ( $p<0.01$ ) than those who were not missing these data.

### Diabetes Cascade of Care

The diabetes cascade of care is shown in Figure 1. The age-adjusted prevalence of diabetes in study participants was 5.5% (95%CI 4.4-6.5%) and was significantly higher in women (6.1% vs 4.9%;  $p<0.01$ ). Prevalence varied by site, with highest prevalence in the urban site of Soweto (9.0%; 95%CI 7.8-10%) and the lowest in rural Navrongo (1.3%; 95%CI 0.7-1.9%) (Supplemental Table S2). Diabetes prevalence was higher in women than men in Soweto and Nairobi (Soweto: 12% vs 6.3%,  $p<0.01$ ; Nairobi: 9.1% vs 4.1%,  $p<0.01$ ) while in Nanoro, the prevalence was higher in men (1.8% vs 4.7%,  $p<0.01$ ).

Overall, just over half of the 613 individuals with diabetes were aware of their condition (54%; 95%CI 50-58%), with the highest awareness in Navrongo (65%; 95%CI 43-84%) and the lowest in Nanoro (25%; 95%CI 16-37%), although confidence intervals across the sites were wide and overlapping. Nearly 75% of individuals aware of having diabetes reported ever receiving treatment, but only 38% (95%CI 30-41%) were adequately controlled. More women reported ever being treated for diabetes ( $p=0.01$ ), but there were no sex differences in participants achieving control ( $p=0.98$ ).

1  
2  
3  
4  
5 In logistic regression models, increasing age (odds ratio [OR] 1.1; 95%CI 1.0-1.1;  
6 p<0.01) and urban residence (OR 2.3; 95%CI 1.6-3.5; p<0.01) were associated with  
7 higher odds of having diabetes (Table 1). Hypertension was also associated with  
8 having diabetes (OR 1.9; 95%CI 1.5-2.4; p<0.01), as was family history of diabetes  
9 (OR 3.9; 95%CI 3.0-5.1; p<0.01); conversely, known HIV positivity was associated  
10 with lower odds of diabetes (OR 0.6; 95%CI 0.4-0.9; p<0.01). Visceral and  
11 subcutaneous fat were also associated with higher odds, while there was a marginal  
12 negative association with hip circumference (Table 1).  
13  
14  
15  
16  
17  
18  
19  
20  
21  
22  
23  
24  
25

26 Similar associations were evident in sensitivity analyses restricted to sites with high  
27 HIV prevalence (Supplemental Table S3). However, only family history remained  
28 significantly associated with diabetes in low HIV prevalence settings, although  
29 previously unobserved associations with male sex and physical activity emerged  
30 (Supplemental Table S4). These analyses were however limited by the low  
31 prevalence of diabetes in these settings which meant they were underpowered.  
32  
33  
34  
35  
36  
37  
38  
39  
40  
41

42 Increasing age (OR 1.1; 95%CI 1.0-1.1; p=0.02), semi-rural environment (OR 2.5;  
43 95%CI 1.1-5.7; p=0.02) and secondary education (OR 2.4; 95%CI 1.2-4.9; p=0.02)  
44 were all associated with greater likelihood of awareness of diabetes, as were the  
45 chronic conditions of hypertension (OR 1.6; 95%CI 1.0-2.4; p=0.04) and known HIV  
46 positivity (OR 2.3; 95%CI 1.2-4.4; p=0.02) (Table 2). In sensitivity analyses in high  
47 HIV prevalence sites, only hypertension and known HIV positivity remained  
48 associated with higher awareness of diabetes (Supplemental Table S5). The sample  
49 size in low HIV prevalence sites was too small to perform meaningful analyses.  
50  
51  
52  
53  
54  
55  
56  
57  
58  
59  
60

Table 1. Factors associated with odds of having diabetes in five sub-Saharan African sites (Agincourt, Dikgale, Nairobi, Nanoro & Navrongo)<sup>1</sup>

|                                     | Odds Ratio | 95% confidence interval | p value |
|-------------------------------------|------------|-------------------------|---------|
| Age                                 | 1.1        | 1.0-1.1                 | <0.01   |
| <b>Sex</b>                          |            |                         |         |
| Women                               | reference  |                         |         |
| Men                                 | 1.1        | 0.8-1.5                 | 0.65    |
| <b>Location</b>                     |            |                         |         |
| Rural                               | reference  |                         |         |
| Semi-rural                          | 1.5        | 1.0-2.3                 | 0.08    |
| Urban                               | 2.3        | 1.6-3.5                 | <0.01   |
| <b>Marital status</b>               |            |                         |         |
| Currently married or cohabitating   | reference  |                         |         |
| Never married or cohabitating       | 1.4        | 0.9-2.0                 | 0.15    |
| Previously married                  | 1.0        | 0.8-1.3                 | 0.99    |
| <b>Educational attainment</b>       |            |                         |         |
| No formal education                 | reference  |                         |         |
| Primary education                   | 1.2        | 0.9-1.7                 | 0.29    |
| Secondary education                 | 1.0        | 0.7-1.5                 | 0.84    |
| Tertiary education                  | 1.4        | 0.7-2.6                 | 0.37    |
| <b>Employment status</b>            |            |                         |         |
| Unemployed                          | reference  |                         |         |
| Employed                            | 1.1        | 0.8-1.5                 | 0.48    |
| <b>Smoking status</b>               |            |                         |         |
| No history of smoking               | reference  |                         |         |
| Current smoker                      | 0.7        | 0.4-1.1                 | 0.15    |
| <b>History of hypertension</b>      |            |                         |         |
| No                                  | reference  |                         |         |
| Yes                                 | 1.9        | 1.5-2.4                 | <0.01   |
| <b>Known HIV positivity</b>         |            |                         |         |
| No                                  | reference  |                         |         |
| Yes                                 | 0.6        | 0.4-0.9                 | 0.01    |
| <b>Family history of diabetes</b>   |            |                         |         |
| No                                  | reference  |                         |         |
| Yes                                 | 3.9        | 3.0-5.1                 | <0.01   |
| <b>Physical activity categories</b> |            |                         |         |
| Absent                              | reference  |                         |         |
| Insufficient                        | 0.9        | 0.5-1.5                 | 0.61    |
| Sufficient                          | 0.7        | 0.5-1.0                 | 0.08    |
| Hip circumference                   | 1.0        | 1.0-1.0                 | 0.04    |
| Visceral fat                        | 1.2        | 1.1-1.2                 | <0.01   |
| Subcutaneous fat                    | 1.3        | 1.1-1.4                 | <0.01   |

<sup>1</sup>7,425 participants were included in the analysis. Participants from the Soweto site were excluded as data on family history were not collected. Age was entered as a continuous variable

Table 2. Factors associated with awareness of diabetes in six sub-Saharan African sites (Agincourt, Dikgale, Nairobi, Nanoro, Navrongo & Soweto)<sup>1</sup>

|                                   | Odds Ratio | 95% confidence interval | p value |
|-----------------------------------|------------|-------------------------|---------|
| Age                               | 1.0        | 1.0-1.1                 | 0.02    |
| <b>Sex</b>                        |            |                         |         |
| Women                             | reference  |                         |         |
| Men                               | 1.1        | 0.7-1.8                 | 0.59    |
| <b>Location</b>                   |            |                         |         |
| Rural                             | reference  |                         |         |
| Semi-rural                        | 2.5        | 1.1-5.7                 | 0.02    |
| Urban                             | 1.5        | 0.7-3.1                 | 0.34    |
| <b>Marital status</b>             |            |                         |         |
| Currently married or cohabitating | reference  |                         |         |
| Never married or cohabitating     | 0.9        | 0.4-2.0                 | 0.84    |
| Previously married                | 1.0        | 0.6-1.7                 | 0.86    |
| <b>Educational attainment</b>     |            |                         |         |
| No formal education               | reference  |                         |         |
| Primary education                 | 1.8        | 0.9-3.5                 | 0.09    |
| Secondary education               | 2.4        | 1.2-4.9                 | 0.02    |
| Tertiary education                | 2.1        | 0.7-6.1                 | 0.17    |
| <b>Employment status</b>          |            |                         |         |
| Unemployed                        | reference  |                         |         |
| Employed                          | 0.8        | 0.5-1.3                 | 0.45    |
| <b>History of hypertension</b>    |            |                         |         |
| No                                |            |                         |         |
| Yes                               | 1.6        | 1.0-2.4                 | 0.04    |
| <b>Known HIV positivity</b>       |            |                         |         |
| No                                | reference  |                         |         |
| Yes                               | 2.3        | 1.2-4.4                 | 0.02    |
| Body mass index                   | 1.0        | 1.0-1.0                 | 0.97    |

<sup>1</sup>472 participants were included in the analysis. Age and body mass index were entered as continuous variables.

## DISCUSSION

In this multi-country study of the diabetes care cascade in SSA, we demonstrate attrition at each stage of the cascade with just over half of those with diabetes being aware of their condition and only approximately a third of those who reported ever receiving treatment achieving optimal glycaemic control. We also report sociodemographic and clinical factors associated with increased odds of having diabetes including older age, urban residence and having hypertension and factors associated with awareness of having diabetes which included increasing age, semi-



1  
2  
3 rural environment, secondary education and having hypertension or known HIV  
4  
5 positivity.  
6  
7  
8  
9

10 Our prevalence estimate of 5.5% is similar to the 2019 International Diabetes  
11 Federation (IDF) estimate for SSA of 4.7% in adults aged 20-79 years.[1] A sub-  
12 regional meta-analysis from western Africa revealed a lower prevalence (4.0% in  
13 urban adults and 2.6% in rural adults),[17] in keeping with our study where  
14 prevalence in the western African sites was two to three times lower than in the  
15 southern and eastern African sites. Factors in our study associated with higher odds  
16 of having diabetes, such as increasing age and urban residence, have been  
17 previously reported, with the western African meta-analysis reporting over a threefold  
18 increase in prevalence in people over 50 years[17] and Werfalli et al. reporting a  
19 prevalence of 20% in people living in urban areas vs 7.9% in those in rural areas.[18]  
20 Our findings of associations with family history of diabetes, hypertension and  
21 adiposity support results from other country-level meta-analyses in Africa.[19,20] We  
22 also noted lower odds of having diabetes in individuals with known HIV in keeping  
23 with other studies that have identified lower prevalence of cardiometabolic risk  
24 factors in individuals with HIV in SSA.[21,22]  
25  
26  
27  
28  
29  
30  
31  
32  
33  
34  
35  
36  
37  
38  
39  
40  
41  
42  
43  
44  
45  
46

47 While our estimate of the prevalence of diabetes unawareness of 47% was broadly  
48 similar to the 2019 IDF estimate of the prevalence of undiagnosed diabetes of 60%  
49 in SSA,[1] it did contrast sharply with other studies. A meta-analysis of 23 studies  
50 from across Africa estimated a much lower pooled prevalence of undiagnosed  
51 diabetes of just under 4%.[23] There was however significant heterogeneity in the  
52 included studies and the majority of the data originated from a single country, which  
53  
54  
55  
56  
57  
58  
59  
60

1  
2  
3 may not be representative of other countries in the region. This itself differed  
4  
5 considerably from data from 12 nationally representative surveys in SSA in which  
6  
7 73% of those with diabetes were unaware of their condition, with factors similar to  
8  
9 our study, namely older age and higher level of educational attainment, associated  
10  
11 with awareness.[24] Our findings also suggest that those with chronic diseases such  
12  
13 as HIV and hypertension may be more aware of having diabetes, which may be due  
14  
15 to increased contact with the health care system.[25]  
16  
17  
18  
19  
20

21  
22 In a study reporting data from 15 sub-Saharan African countries, approximately 40%  
23  
24 of adults with diabetes received glucose-lowering medication, while approximately  
25  
26 25% received counselling on diet, exercise or weight loss.[2] These proportions are  
27  
28 lower than ours which may be due to the difference in denominators - we used a  
29  
30 denominator of individuals aware of having diabetes rather than all those with  
31  
32 diabetes. In another study reporting data from 12 sub-Saharan African countries, just  
33  
34 over 30% of those with diabetes were aware of their condition, with a similar  
35  
36 percentage ever having received lifestyle advice or currently receiving diabetes  
37  
38 medication and just over 20% achieving control. [3] While this study also used a  
39  
40 fixed denominator of the number of people with diabetes, the results support our  
41  
42 finding that there is not a major fall-off between the stages of awareness and  
43  
44 treatment and the most significant deficits are at the stages of awareness of having  
45  
46 diabetes i.e., diagnosis and achieving glycaemic control. Of note, this study used a  
47  
48 more liberal definition of glycaemic control than our study (FPG <10.1 mmol/l or  
49  
50 glycosylated haemoglobin (HbA<sub>1c</sub>) <8% in the single study in which it was available)  
51  
52 and may have identified a more drastic control deficit if a threshold for glycaemic  
53  
54 control similar to ours had been used. A country-level meta-analysis of 22 studies  
55  
56  
57  
58  
59  
60

1  
2  
3 from Ethiopia suggested a similar degree of glycaemic control as our study, with  
4 approximately a third of those included achieving glycaemic targets, regardless of  
5 whether these were assessed using fasting plasma glucose or HbA<sub>1c</sub>. [26]  
6  
7  
8  
9

10  
11  
12 We describe, to our knowledge, the first study in SSA in which harmonised primary  
13 data on the diabetes care cascade have been collected from multiple countries.  
14

15  
16 Previous multi-country research in SSA on this subject has relied on systematic  
17 reviews and meta-analyses and has therefore been limited by the methodological  
18 heterogeneity of the constituent studies, including the use of different biomarkers to  
19 define diabetes. In our work, data were collected in a standardised manner and in  
20 addition to self-report, we used venous blood samples, analysed at a single  
21 laboratory, to ascertain biochemical evidence of diabetes. Our study also included  
22 over 10,000 men and women from three sub-regions of SSA.  
23  
24  
25  
26  
27  
28  
29  
30  
31  
32  
33

34  
35 Our study does have limitations. We did not distinguish between type 1 and type 2  
36 diabetes and the care cascade and associated factors may differ between these two  
37 conditions. While we used accepted and convenient diagnostic criteria for diabetes,  
38 we may have underestimated the prevalence of diabetes as we did not assess  
39 glucose tolerance and may therefore have excluded those who met the criteria for  
40 diabetes only after a glucose challenge, which may be particularly important in  
41 populations of African descent. Both oral glucose tolerance tests and HbA<sub>1c</sub>, appear  
42 to classify more African-ancestry individuals as having diabetes than FPG alone [27,  
43 28] and use of either of these criteria may have increased diabetes prevalence in our  
44 study. Our research was conducted in HDSS sites and among a research cohort in  
45 Soweto, populations which may not be nationally representative. Indeed, individuals  
46  
47  
48  
49  
50  
51  
52  
53  
54  
55  
56  
57  
58  
59  
60

1  
2  
3 in these sites may have been told they had diabetes while taking part in previous  
4 studies, making the proportion of individuals with diabetes who know they have the  
5 condition higher than in the general population. We also used self-report rather than  
6 clinical records to determine ever receiving diabetes treatment. Fasting plasma  
7 glucose was used to assess diabetes control and this provides an evaluation only at  
8 a single point in time and may be subject to more analytic variability than HbA<sub>1c</sub>,  
9 which has largely supplanted it in clinical use in well-resourced environments.  
10 Several large scale epidemiological studies have however used plasma glucose  
11 measures to assess glycaemic control.[2,3] We collected data for this study between  
12 2013 and 2016 and it is conceivable that some of the parameters in the cascade  
13 may have changed during or since that time.  
14  
15  
16  
17  
18  
19  
20  
21  
22  
23  
24  
25  
26  
27  
28  
29  
30

31 Despite these limitations, our study provides valuable information on the burden of  
32 diabetes in SSA and the deficiencies which need to be addressed to improve  
33 outcomes. In areas where diabetes prevalence is low, primordial prevention  
34 strategies should be employed to reduce the likelihood of developing risk factors  
35 such as obesity, with particular focus on higher risk urban environments. Screening  
36 of at-risk populations needs to be enhanced and the low percentage of individuals  
37 attaining satisfactory glycaemic control suggests that more aggressive, treat to target  
38 strategies need to be promoted among health care workers, although we  
39 acknowledge this may be limited by drug availability in many parts of the continent.  
40  
41  
42  
43  
44  
45  
46  
47  
48  
49  
50  
51  
52  
53

54 Additional work is necessary to understand whether our findings are applicable to  
55 other SSA countries and sub-regions at different stages of the epidemiological  
56 transition and with variable access to health care. It is also essential to understand  
57  
58  
59  
60

1  
2  
3 key determinants of ever receiving diabetes treatment and control, which we were  
4  
5 underpowered to investigate, and care cascades for other important vascular risk  
6  
7 factors in people with diabetes, such as elevated blood pressure and dyslipidaemia.  
8  
9 Identification of the points in each of these care cascades at which significant  
10  
11 attrition is occurring will assist public health officials in developing appropriate  
12  
13 interventions to reduce diabetes-related morbidity and mortality.  
14  
15  
16  
17  
18  
19  
20  
21  
22  
23  
24  
25  
26  
27  
28  
29  
30  
31  
32  
33  
34  
35  
36  
37  
38  
39  
40  
41  
42  
43  
44  
45  
46  
47  
48  
49  
50  
51  
52  
53  
54  
55  
56  
57  
58  
59  
60

For peer review only

## ACKNOWLEDGEMENTS

Author contributions: ANW-conceptualisation, writing-original draft, review and editing, funding acquisition; IM-formal analysis, writing-review and editing; GoAg-data collection, investigation, writing-review and editing; GeAs-data collection, investigation, writing-review and editing; PRB-data collection, investigation, writing-review and editing, funding acquisition; SC-investigation, writing-review and editing; FXGO-data collection, investigation, writing-review and editing, funding acquisition; EM-investigation, writing-review and editing; LKM- investigation, writing-review and editing; SFM-investigation, writing-review and editing; EAN-data collection, investigation, writing-review and editing; SAN-conceptualisation, investigation, writing-review and editing; HS-data collection, investigation writing-review and editing; MR-conceptualisation, writing-review and editing, project administration, funding acquisition; NJC-conceptualisation, writing-review and editing, funding acquisition

ANW and MR had full access to all the data in the study and take responsibility for the integrity of the data. IM performed the data analysis and takes responsibility for its accuracy. All authors consent to the publication of this manuscript and agree to be accountable for all aspects of this work.

Funding sources: The AWI-Gen Collaborative Centre is funded by the National Human Genome Research Institute (NHGRI), Office of the Director (OD), the Eunice Kennedy Shriver National Institute of Child Health & Human Development (NICHD), the National Institute of Environmental Health Sciences (NIEHS), the Office of AIDS Research (OAR) and the National Institute of Diabetes and Digestive and Kidney

1  
2  
3 Diseases (NIDDK) of the National Institutes of Health (NIH) [grant number  
4 U54HG006938 and its supplements], as part of the H3Africa Consortium as well as  
5  
6 by the Department of Science and Innovation, South Africa [grant number DST/CON  
7  
8 0056/2014].  
9  
10  
11  
12

13  
14 Funding for the Soweto site was also received from the South African Medical  
15  
16 Research Council.  
17  
18

19  
20 ANW is supported by the Fogarty International Centre, National Institutes of Health  
21  
22 [grant number K43TW010698].  
23  
24  
25

26  
27 This paper describes the views of the authors and does not necessarily represent  
28  
29 the official views of the National Institutes of Health (USA) or the South African  
30  
31 Department of Science and Innovation who funded this research. The funders had  
32  
33 no role in study design, data collection, analysis and interpretation, report writing or  
34  
35 the decision to submit this article for publication.  
36  
37  
38

39  
40 Conflict of interest disclosures: ANW declares an honorarium received from Sanofi  
41  
42 for serving as a panel member at an educational event on thyroid cancer. SAN  
43  
44 declares participation in a data safety monitoring board of a Phase IV open-label trial  
45  
46 to assess bone mineral density in a cohort of African women on Depo-Provera and  
47  
48 tenofovir disoproxil fumarate switched to tenofovir alafenamide fumarate based anti-  
49  
50 retroviral therapy and Council membership in the International Society of  
51  
52  
53  
54  
55  
56  
57  
58  
59  
60  
61  
62  
63  
64  
65  
66  
67  
68  
69  
70  
71  
72  
73  
74  
75  
76  
77  
78  
79  
80  
81  
82  
83  
84  
85  
86  
87  
88  
89  
90  
91  
92  
93  
94  
95  
96  
97  
98  
99  
100  
Developmental Origins of Health and Disease.

1  
2  
3 Data statement: De-identified individual participant data from the AWI-Gen study are  
4 available from the European Genome-Phenome Archive (EGA) at study number  
5  
6 EGA00001002482 [[https://ega459 archive.org/datasets/EGAD00001006425](https://ega459.archive.org/datasets/EGAD00001006425)].  
7  
8  
9  
10  
11  
12  
13  
14  
15  
16  
17  
18  
19  
20  
21  
22  
23  
24  
25  
26  
27  
28  
29  
30  
31  
32  
33  
34  
35  
36  
37  
38  
39  
40  
41  
42  
43  
44  
45  
46  
47  
48  
49  
50  
51  
52  
53  
54  
55  
56  
57  
58  
59  
60

For peer review only



## Ethics Approval

Written informed consent was provided by participants in their local languages.

Ethical approval for the AWI-Gen study was provided by the Human Research Ethics Committee (Medical) of the University of the Witwatersrand (M121029, M170880).

Each of the HDSS centres also obtained ethical approval according to their respective institutional and country-specific regulations.

For peer review only

## REFERENCES

1. International Diabetes Federation. IDF Diabetes Atlas, 10th edn. Brussels, Belgium, 2021.
2. Flood D, Seiglie JA, Dunn M, et al. The state of diabetes treatment coverage in 55 low-income and middle-income countries: a cross-sectional study of nationally representative, individual-level data in 680 102 adults. *Lancet Healthy Longev.* 2021;2:e340-e351. doi: 10.1016/s2666-7568(21)00089-1
3. Manne-Goehler J, Geldsetzer P, Agoudavi K, et al. Health system performance for people with diabetes in 28 low- and middle-income countries: a cross-sectional study of nationally representative surveys. *PLoS Med.* 2019;16:e1002751. doi: 10.1371/journal.pmed.1002751.
4. Kazemian P, Shebl FM, McCann N, Walensky RP, Wexler DJ. Evaluation of the cascade of diabetes care in the United States, 2005-2016. *JAMA Intern Med.* 2019;179:1376–1385. doi: 10.1001/jamainternmed.2019.2396.
5. Ramsay M, Crowther N, Tambo E, et al. H3Africa AWI-Gen Collaborative Centre: a resource to study the interplay between genomic and environmental risk factors for cardiometabolic diseases in four sub-Saharan African countries. *Glob Health Epidemiol Genom.* 2016;1:e20. doi: 10.1017/gheg.2016.17.
6. Ali SA, Soo C, Agongo G, et al. Genomic and environmental risk factors for cardiometabolic diseases in Africa: methods used for Phase 1 of the AWI-Gen population cross-sectional study. *Glob Health Action.* 2018;11(Suppl 2):1507133. doi: 10.1080/16549716.2018.1507133.
7. Jaff NG, Norris SA, Snyman T, Toman M, Crowther NJ. Body composition in the Study of Women Entering and in Endocrine Transition (SWEET): a perspective of African women who have a high prevalence of obesity and HIV infection. *Metabolism.* 2015;64:1031–1041. doi:10.1016/j.metabol.2015.05.009
8. Richter L, Norris S, Pettifor J, Yach D, Cameron N. Cohort profile: Mandela's children: the 1990 Birth to Twenty study in South Africa. *Int J Epidemiol.* 2007;36:504–511. doi: 10.1093/ije/dym016
9. Unger T, Borghi C, Charchar F, et al. 2020 International Society of Hypertension global hypertension practice guidelines. *Hypertension.* 2020;75:1334-1357. doi: 10.1161/HYPERTENSIONAHA.120.15026
10. World Health Organisation. Global Physical Activity Questionnaire analysis guide. <https://www.who.int/ncds/surveillance/steps/GPAQ/en/> (accessed October 30, 2020).
11. American Diabetes Association. Standards of medical care in diabetes-2021. *Diabetes Care.* 2021;44(Suppl 1):S73–S84.
12. Diagnosis and management of type 2 diabetes (HEARTS-D). Geneva]: World Health Organization; 2020 (WHO/UCN/NCD/20.1). Licence: CC BY-NC-SA 3.0 IGO
13. United Nations Department of Economic and Social Affairs. World Population Prospects 2019. <https://population.un.org/wpp/DataQuery/> (accessed June 29, 2021).

14. Tiwari RC, Clegg LX, Zou Z. Efficient interval estimation for age-adjusted cancer rates. *Stat Methods Med Res*. 2006;15:547–569. doi: 10.1177/0962280206070621
15. Mbanya JC, Motala AA, Sobngwi E, Assah FK, Enoru ST. Diabetes in sub-Saharan Africa. *Lancet*. 2010;375:2254–2266. doi: 10.1016/S0140-6736(10)60550-8
16. Pinchevsky Y, Butkow N, Raal FJ, Chirwa T, Rothberg A. Demographic and clinical factors associated with development of type 2 diabetes: a review of the literature. *Int J Gen Med*. 2020;13:121–129. doi: 10.2147/IJGM.S226010
17. Abubakari AR, Lauder W, Jones MC, Kirk A, Agyemang C, Bhopal RS. Prevalence and time trends in diabetes and physical inactivity among adult West African populations: the epidemic has arrived. *Public Health*. 2009;123:602–614. doi: 10.1016/j.puhe.2009.07.009
18. Werfalli M, Engel ME, Musekiwa A, Kengne AP, Levitt NS. The prevalence of type 2 diabetes among older people in Africa: a systematic review. *Lancet Diabetes Endocrinol*. 2016;4:72–84. doi: 10.1016/S2213-8587(15)00363-0
19. Bigna JJ, Nansseu JR, Katte JC, Noubiap JJ. Prevalence of prediabetes and diabetes mellitus among adults residing in Cameroon: a systematic review and meta-analysis. *Diabetes Res Clin Pract*. 2018;137:109–118. doi: 10.1016/j.diabres.2017.12.005
20. Asamoah-Boaheng M, Sarfo-Kantanka O, Tuffour AB, Eghan B, Mbanya JC. Prevalence and risk factors for diabetes mellitus among adults in Ghana: a systematic review and meta-analysis. *Int Health*. 2019;11:83–92. doi: 10.1093/inthealth/ihy067
21. Gaziano TA, Abrahams-Gessel S, Gomez-Olive FX, et al. Cardiometabolic risk in a population of older adults with multiple co-morbidities in rural South Africa: the HAALSI (Health and Aging in Africa: Longitudinal Studies of INDEPTH communities) study. *BMC Public Health*. 2017;17:206. doi: 10.1186/s12889-017-4117-y
22. Nonterah EA, Boua PR, Klipstein-Grobusch K, et al. Classical cardiovascular risk factors and HIV are associated with carotid intima-media thickness in adults from sub-Saharan Africa: findings from H3Africa AWI-Gen study. *J Am Heart Assoc*. 2019;8:e011506. doi: 10.1161/JAHA.118.011506
23. Dessie G, Mulugeta H, Amare D, et al. A systematic analysis on prevalence and sub-regional distribution of undiagnosed diabetes mellitus among adults in African countries. *J Diabetes Metab Disord*. 2020;19:1931–1941. doi: 10.1007/s40200-020-00635-9
24. Manne-Goehler J, Atun R, Stokes A, et al. Diabetes diagnosis and care in sub-Saharan Africa: pooled analysis of individual data from 12 countries. *Lancet Diabetes Endocrinol*. 2016;4:903–912. doi: 10.1016/S2213-8587(16)30181-4
25. Manne-Goehler J, Montana L, Gómez-Olivé FX, et al. The ART advantage: health care utilization for diabetes and hypertension in rural South Africa. *J Acquir Immune Defic Syndr*. 2017;75:561-567. doi:10.1097/QAI.0000000000001445
26. Gebreyohannes EA, Netere AK, Belachew SA. Glycemic control among diabetic patients in Ethiopia: a systematic review and meta-analysis. *PLoS One*. 2019;14:e0221790. doi: 10.1371/journal.pone.0221790
27. Jagannathan R, DuBose CW, Mabundo LS, et al. The OGTT is highly reproducible in Africans for the diagnosis of diabetes: implications for

- 1  
2  
3 treatment and protocol design. *Diabetes Res Clin Pract.* 2020;170:108523.  
4 doi: 10.1016/j.diabres.2020.108523  
5  
6 28. Wade AN, Crowther NJ, Abrahams-Gessel S, et al. Concordance between  
7 fasting plasma glucose and HbA<sub>1c</sub> in the diagnosis of diabetes in black South  
8 African adults: a cross-sectional study. *BMJ Open.* 2021;11:e046060. doi:  
9 10.1136/bmjopen-2020-046060  
10  
11  
12  
13  
14  
15  
16  
17  
18  
19  
20  
21  
22  
23  
24  
25  
26  
27  
28  
29  
30  
31  
32  
33  
34  
35  
36  
37  
38  
39  
40  
41  
42  
43  
44  
45  
46  
47  
48  
49  
50  
51  
52  
53  
54  
55  
56  
57  
58  
59  
60

For peer review only

1  
2  
3 Figure 1. Diabetes cascade of care in six sub-Saharan African countries, overall and  
4 stratified by gender  
5  
6

7  
8 Estimates given as counts and proportions with 95% confidence intervals and  
9 proportions calculated as percentages of eligible individuals in previous stage.  
10  
11

12 Estimates for ever receiving treatment and achieving glycaemic control (calculated  
13 as percentage of those who ever received treatment) exclude Soweto as the  
14 treatment variable was not collected at that site. Data on diabetes control were  
15 missing for a further 17 participants.  
16  
17  
18  
19  
20  
21  
22  
23  
24  
25  
26  
27  
28  
29  
30  
31  
32  
33  
34  
35  
36  
37  
38  
39  
40  
41  
42  
43  
44  
45  
46  
47  
48  
49  
50  
51  
52  
53  
54  
55  
56  
57  
58  
59  
60



Figure 1. Diabetes cascade of care in six sub-Saharan African countries, overall and stratified by gender. Estimates given as counts and proportions with 95% confidence intervals and proportions calculated as percentages of eligible individuals in previous stage. Estimates for ever receiving treatment and achieving glycaemic control (calculated as percentage of those who ever received treatment) exclude Soweto as the treatment variable was not collected at that site. Data on diabetes control were missing for a further 17 participants

139x101mm (300 x 300 DPI)

## Supplemental material

Supplemental Table S1. Demographic and clinical characteristics of 10,700 study participants in six sub-Saharan African sites

Supplemental Table S2. Diabetes care cascade by study site

Supplemental Table S3. Factors associated with odds of having diabetes across three sub-Saharan African sites with high HIV prevalence (Agincourt, Dikgale & Nairobi)

Supplemental Table S4. Factors associated with odds of having diabetes across two sub-Saharan African sites with low HIV prevalence (Navrongo & Nanoro)

Supplemental Table S5. Factors associated with awareness in high HIV prevalence sites (Agincourt, Dikgale, Nairobi & Soweto)

peer review only

1  
2**Table S1. Demographic and clinical characteristics of 10,700 study participants in six sub-Saharan African sites**

|                                  | Soweto         |                |               | Agincourt     |               |               | Dikgale       |               |               | Nanoro         |                |               | Navrongo      |                |               | Nairobi       |                |               | Overall        |                |               |
|----------------------------------|----------------|----------------|---------------|---------------|---------------|---------------|---------------|---------------|---------------|----------------|----------------|---------------|---------------|----------------|---------------|---------------|----------------|---------------|----------------|----------------|---------------|
|                                  | Men            | Women          | Overall       | Men           | Women         | Overall       | Men           | Women         | Overall       | Men            | Women          | Overall       | Men           | Women          | Overall       | Men           | Women          | Overall       | Men            | Women          | Overall       |
|                                  | n=1,025<br>51% | n=1,002<br>49% | n=2,027       | n=573<br>39%  | n=892<br>61%  | n=1,465       | n=356<br>31%  | n=812<br>69%  | n=1,168       | n=1,045<br>50% | n=1,039<br>50% | n=2,084       | n=923<br>46%  | n=1,091<br>54% | n=2,014       | n=886<br>46%  | n=1,056<br>54% | n=1,942       | n=4,808<br>45% | n=5,892<br>55% | n=10,700      |
| Age (years)                      | 49<br>(44-55)  | 49<br>(44-54)  | 49<br>(44-54) | 51<br>(45-56) | 51<br>(46-56) | 51<br>(46-56) | 50<br>(45-55) | 51<br>(46-56) | 51<br>(45-55) | 50<br>(44-55)  | 50<br>(45-54)  | 50<br>(45-55) | 50<br>(46-55) | 52<br>(47-56)  | 51<br>(46-56) | 48<br>(44-53) | 48<br>(44-52)  | 48<br>(44-53) | 50<br>(45-55)  | 50<br>(45-55)  | 50<br>(45-55) |
| Marital status (%)               |                |                |               |               |               |               |               |               |               |                |                |               |               |                |               |               |                |               |                |                |               |
| Currently married/<br>Cohabiting | 570<br>(56)    | 266<br>(27)    | 836<br>(41)   | 445<br>(78)   | 537<br>(60)   | 982<br>(67)   | 178<br>(50)   | 427<br>(53)   | 605<br>(52)   | 1,021<br>(98)  | 794<br>(76)    | 1,815<br>(87) | 787<br>(85)   | 694<br>(64)    | 1,481<br>(74) | 808<br>(91)   | 486<br>(46)    | 1,294<br>(67) | 3,809<br>(79)  | 3,204<br>(54)  | 7,013<br>(66) |
| Never married/<br>Cohabiting     | 265<br>(26)    | 51<br>(5.1)    | 316<br>(16)   | 75<br>(13)    | 59<br>(6.6)   | 134<br>(9.2)  | 103<br>(29)   | 185<br>(23)   | 288<br>(25)   | 14<br>(1.3)    | 3<br>(0.3)     | 17<br>(0.8)   | 15<br>(1.6)   | 5<br>(0.5)     | 20<br>(1.0)   | 13<br>(1.5)   | 70<br>(6.6)    | 83<br>(4.3)   | 485<br>(10)    | 373<br>(6.3)   | 858<br>(8.0)  |
| Previously married               | 189<br>(19)    | 347<br>(35)    | 536<br>(26)   | 53<br>(9.2)   | 296<br>(33)   | 349<br>(24)   | 75<br>(22)    | 200<br>(25)   | 275<br>(24)   | 8<br>(0.8)     | 238<br>(23)    | 246<br>(12)   | 120<br>(13)   | 392<br>(36)    | 512<br>(26)   | 65<br>(7.3)   | 499<br>(47)    | 564<br>(29)   | 510<br>(11)    | 1,972<br>(33)  | 2,482<br>(23) |
| Missing                          | 1<br>(0.1)     | 338<br>(34)    | 339<br>(17)   | 0<br>(0)      | 0<br>(0)      | 0<br>(0)      | 0<br>(0)      | 0<br>(0)      | 0<br>(0)      | 2<br>(0.2)     | 4<br>(0.4)     | 6<br>(0.3)    | 1<br>(0.1)    | 0<br>(0)       | 1<br>(0.1)    | 0<br>(0)      | 1<br>(0.1)     | 1<br>(0.1)    | 4<br>(0.1)     | 343<br>(5.8)   | 347<br>(3.2)  |
| Highest level of education (%)   |                |                |               |               |               |               |               |               |               |                |                |               |               |                |               |               |                |               |                |                |               |
| No formal education              | 8<br>(0.8)     | 2<br>(0.2)     | 10<br>(0.5)   | 23<br>(22)    | 280<br>(31)   | 403<br>(28)   | 22<br>(6.2)   | 74<br>(9.1)   | 96<br>(8.2)   | 758<br>(73)    | 960<br>(92)    | 1,718<br>(82) | 570<br>(62)   | 843<br>(77)    | 1,413<br>(70) | 34<br>(3.8)   | 113<br>(11)    | 147<br>(7.6)  | 1,515<br>(32)  | 2,272<br>(39)  | 3,787<br>(35) |
| Primary education                | 117<br>(11)    | 636<br>(64)    | 753<br>(37)   | 235<br>(41)   | 340<br>(38)   | 575<br>(39)   | 113<br>(32)   | 273<br>(34)   | 386<br>(33)   | 181<br>(17)    | 58<br>(5.6)    | 239<br>(12)   | 206<br>(22)   | 177<br>(16)    | 383<br>(19)   | 447<br>(51)   | 663<br>(63)    | 1,110<br>(57) | 1,299<br>(27)  | 2,147<br>(36)  | 3,446<br>(32) |
| Secondary education              | 748<br>(73)    | 147<br>(15)    | 895<br>(44)   | 175<br>(31)   | 223<br>(25)   | 398<br>(27)   | 204<br>(57)   | 440<br>(54)   | 644<br>(55)   | 86<br>(8.2)    | 10<br>(1)      | 96<br>(4.6)   | 118<br>(13)   | 57<br>(5.2)    | 175<br>(8.7)  | 383<br>(43)   | 276<br>(26)    | 659<br>(34)   | 1,714<br>(36)  | 1,153<br>(20)  | 2,867<br>(27) |
| Tertiary education               | 152<br>(15)    | 1<br>(0.1)     | 153<br>(7.5)  | 39<br>(6.8)   | 49<br>(5.5)   | 88<br>(6.0)   | 17<br>(4.8)   | 24<br>(3.0)   | 41<br>(3.5)   | 16<br>(1.5)    | 2<br>(0.2)     | 18<br>(0.9)   | 27<br>(2.9)   | 9<br>(0.8)     | 36<br>(1.8)   | 22<br>(2.5)   | 4<br>(0.4)     | 26<br>(1.3)   | 273<br>(5.7)   | 89<br>(1.5)    | 362<br>(3.4)  |
| Missing                          | 0<br>(0)       | 216<br>(22)    | 216<br>(10.7) | 1<br>(0.2)    | 0<br>(0.0)    | 1<br>(0.1)    | 0<br>(0)      | 1<br>(0.1)    | 1<br>(0.1)    | 4<br>(0.4)     | 9<br>(0.9)     | 13<br>(0.6)   | 2<br>(0.2)    | 5<br>(0.5)     | 7<br>(0.4)    | 0<br>(0)      | 0<br>(0)       | 0<br>(0)      | 7<br>(0.2)     | 231<br>(3.9)   | 238<br>(2.2)  |
| Employed (%)                     | 670<br>(65)    | 547<br>(55)    | 1,217<br>(60) | 197<br>(34)   | 303<br>(34)   | 500<br>(34)   | 160<br>(45)   | 279<br>(34)   | 439<br>(37)   | 1,026<br>(98)  | 1,030<br>(99)  | 2,056<br>(99) | 599<br>(65)   | 659<br>(60)    | 1,258<br>(63) | 860<br>(97)   | 966<br>(92)    | 1,826<br>(94) | 3,512<br>(73)  | 3,784<br>(64)  | 7,296<br>(68) |
| Current smoker (%)               | 540<br>(53)    | 49<br>(4.9)    | 589<br>(29)   | 155<br>(27)   | 3<br>(0.3)    | 158<br>(11)   | 225<br>(63)   | 25<br>(3.1)   | 250<br>(21)   | 142<br>(14)    | 0<br>(0)       | 142<br>(6.8)  | 388<br>(42)   | 21<br>(1.9)    | 409<br>(20)   | 208<br>(24)   | 27<br>(2.6)    | 235<br>(12)   | 1,658<br>(35)  | 125<br>(2.1)   | 1,783<br>(17) |
| Hypertension (%)                 | 550<br>(54)    | 552<br>(55)    | 1102<br>(54)  | 251<br>(44)   | 517<br>(58)   | 768<br>(52)   | 116<br>(33)   | 392<br>(49)   | 508<br>(44)   | 215<br>(21)    | 127<br>(12)    | 342<br>(17)   | 227<br>(25)   | 274<br>(25)    | 501<br>(25)   | 204<br>(23)   | 319<br>(30)    | 523<br>(27)   | 1,563<br>(33)  | 2,181<br>(37)  | 3,744<br>(35) |
| Known HIV positive (%)           | 189<br>(18)    | 121<br>(12)    | 310<br>(15)   | 186<br>(33)   | 304<br>(34)   | 490<br>(33)   | 73<br>(21)    | 175<br>(22)   | 248<br>(21)   | 5<br>(0.5)     | 4<br>(0.4)     | 9<br>(0.4)    | 9<br>(1.0)    | 6<br>(0.6)     | 15<br>(0.7)   | 67<br>(7.6)   | 171<br>(16)    | 238<br>(12)   | 529<br>(11)    | 781<br>(13)    | 1,310<br>(12) |

40  
41  
42  
43  
44  
45  
46



1  
2

|                                        |                   |                     |                    |                   |                    |                    |                  |                    |                    |                  |                  |                  |                  |                  |                  |                  |                    |                   |                  |                   |                   |
|----------------------------------------|-------------------|---------------------|--------------------|-------------------|--------------------|--------------------|------------------|--------------------|--------------------|------------------|------------------|------------------|------------------|------------------|------------------|------------------|--------------------|-------------------|------------------|-------------------|-------------------|
| 3 Family history of diabetes (%)       | NA                | NA                  | NA                 | 85 (15)           | 161 (18)           | 246 (17)           | 53 (15)          | 134 (17)           | 187 (16)           | 24 (2.3)         | 12 (1.2)         | 36 (1.7)         | 12 (1.3)         | 10 (0.9)         | 22 (1.1)         | 112 (13)         | 213 (20)           | 325 (17)          | 286 (6.0)        | 530 (9.0)         | 816 (7.6)         |
| 5 Body mass index (kg/m <sup>2</sup> ) | 24.2 (20.6-28.5)  | 32.9 (28.5-37.6)    | 28.4 (23-33.9)     | 23 (20.3-26.6)    | 28.6 (24.1-33.2)   | 26 (22.1-31.3)     | 20.6 (18.9-24.1) | 30.1 (25.3-35.9)   | 26.9 (21.1-33.1)   | 21.1 (19.2-23.4) | 19.8 (18.1-21.6) | 20.4 (18.6-22.6) | 20.6 (19-22.3)   | 21.4 (19.6-23.9) | 21 (19.3-23.1)   | 22.2 (20-25)     | 26.9 (23-31.7)     | 24.4 (21.1-28.6)  | 21.7 (19.5-24.9) | 25.5 (20.8-31.9)  | 23.2 (20.1-28.6)  |
| 8 Hip circumference (cm)               | 97.4 (90.0-105.3) | 117.5 (109.0-127.0) | 107.0 (95.7-118.5) | 94.0 (89.0-102.0) | 105.0 (97.0-113.0) | 100.0 (93.0-110.0) | 87.6 (83.3-94.9) | 108.7 (98.5-118.9) | 101.9 (90.1-114.3) | 89.5 (85.6-94.9) | 87.8 (83.4-92.5) | 88.8 (84.5-93.7) | 83.0 (79.0-88.0) | 88.0 (83.0-94.0) | 86.0 (81.0-91.0) | 93.0 (87.4-98.9) | 101.0 (94.0-110.0) | 97.0 (90.0-104.6) | 90.6 (85.0-98.0) | 99.0 (89.0-112.0) | 94.2 (86.6-105.3) |
| 11 Subcutaneous fat (cm)               | 1.4 (0.9-2.0)     | .1 (2.5-3.9)        | 2.2 (1.3-3.2)      | 1.2 (0.7-1.7)     | 2.2 (1.5-3.0)      | 1.7 (1.1-2.7)      | 0.8 (0.5-1.2)    | 2.2 (1.6-2.9)      | 1.7 (0.9-2.6)      | 0.8 (0.6-1.2)    | 0.9 (0.6-1.2)    | 0.9 (0.6-1.2)    | 0.7 (0.5-0.9)    | 1.0 (0.7-1.5)    | 0.8 (0.6-1.2)    | 1.0 (0.7-1.5)    | 2.0 (1.4-2.4)      | 1.5 (1.0-2.1)     | 0.9 (0.6-1.4)    | 1.7 (1.0-2.6)     | 1.2 (0.8-2.1)     |
| 14 Visceral fat (cm)                   | 6.2 (5-7.8)       | 4.7 (3.5-5.9)       | 5.5 (4.2-6.9)      | 6.3 (5.2-7.8)     | 5.9 (4.2-7.3)      | 6.1 (4.6-7.5)      | 5.9 (4.7-7.4)    | 6.7 (4.9-8.5)      | 6.4 (4.9-8.2)      | 4.3 (3.5-5.2)    | 4.3 (3.6-5.1)    | 4.3 (3.5-5.1)    | 4 (3.3-4.8)      | 3.3 (2.8-4.1)    | 3.6 (3-4.5)      | 5 (3.9-6.3)      | 4.6 (3.6-5.8)      | 4.8 (3.7-6)       | 5 (3.9-6.5)      | 4.5 (3.4-6)       | 4.7 (3.6-6.2)     |
| 17 Physical activity categories (%)    |                   |                     |                    |                   |                    |                    |                  |                    |                    |                  |                  |                  |                  |                  |                  |                  |                    |                   |                  |                   |                   |
| 18 Absent                              | 63 (6.2)          | 167 (17)            | 230 (11)           | 106 (19)          | 143 (16)           | 249 (17)           | 3 (0.9)          | 8 (1)              | 11 (1.3)           | 227 (22)         | 110 (11)         | 337 (16)         | 64 (7.1)         | 154 (14)         | 218 (11)         | 6 (0.7)          | 19 (1.8)           | 25 (1.3)          | 469 (9.8)        | 601 (10)          | 1,070 (10)        |
| 20 Sufficient                          | 134 (13)          | 283 (28)            | 417 (21)           | 21 (3.7)          | 58 (6.5)           | 79 (5.4)           | 16 (4.5)         | 27 (3.3)           | 134 (6.9)          | 37 (3.5)         | 34 (3.3)         | 71 (3.4)         | 35 (3.9)         | 59 (5.4)         | 94 (4.7)         | 41 (4.6)         | 93 (8.8)           | 134 (6.9)         | 284 (5.9)        | 554 (9.4)         | 838 (7.9)         |
| 22 Sufficient                          | 828 (81)          | 552 (55)            | 1,380 (68)         | 443 (78)          | 686 (77)           | 1,129 (78)         | 334 (95)         | 776 (96)           | 1,780 (92)         | 781 (75)         | 895 (86)         | 1,676 (80)       | 807 (89)         | 874 (80)         | 1,681 (84)       | 839 (95)         | 941 (89)           | 1,780 (92)        | 4,032 (84)       | 4,724 (80)        | 8,756 (82)        |

24 Continuous variables are summarised as medians and interquartile ranges and categorical variables as n (%); NA-not applicable

25  
26  
27  
28  
29  
30  
31  
32  
33  
34  
35  
36  
37  
38  
39  
40  
41  
42  
43  
44  
45  
46

Table S2. Diabetes care cascade by study site

|                                      | Soweto       |               |             |       | Agincourt     |               |               |      | Dikgale       |              |               |       | Nanoro        |               |               |       | Navrongo      |               |               |       | Nairobi       |               |              |       |
|--------------------------------------|--------------|---------------|-------------|-------|---------------|---------------|---------------|------|---------------|--------------|---------------|-------|---------------|---------------|---------------|-------|---------------|---------------|---------------|-------|---------------|---------------|--------------|-------|
|                                      | T            | M             | W           | p     | T             | M             | W             | p    | T             | M            | W             | p     | T             | M             | W             | p     | T             | M             | W             | p     | T             | M             | W            | p     |
| Sample size                          | 2,027        | 1,025         | 1,002       |       | 1,465         | 573           | 892           |      | 1,168         | 356          | 812           |       | 2,084         | 1,045         | 1,039         |       | 2,014         | 923           | 1,091         |       | 1,942         | 886           | 1,056        |       |
| Diabetes present (n)                 | 191          | 72            | 119         |       | 92            | 40            | 52            |      | 105           | 28           | 77            |       | 71            | 50            | 21            |       | 23            | 11            | 12            |       | 131           | 37            | 94           |       |
| Crude diabetes prevalence (%)        | 9.4 (8.2-11) | 7.0 (5.5-8.8) | 12 (9.9-14) |       | 6.3 (5.1-7.6) | 7.0 (5.0-9.4) | 5.8 (4.4-7.6) |      | 9.0 (7.4-11)  | 7.9 (5.3-11) | 9.5 (7.6-12)  |       | 3.4 (2.7-4.3) | 4.8 (3.6-6.3) | 2.0 (1.3-3.1) |       | 1.1 (0.7-1.7) | 1.2 (0.6-2.1) | 1.1 (0.6-1.9) |       | 6.8 (5.7-8.0) | 4.2 (3.0-5.7) | 8.9 (7.3-11) |       |
| Age-adjusted diabetes prevalence (%) | 9.0 (7.8-10) | 6.3 (4.9-7.9) | 12 (9.7-14) | <0.01 | 5.3 (4.1-6.4) | 5.7 (4.0-8.1) | 5.0 (3.6-6.8) | 0.56 | 7.4 (6.0-8.9) | 7.2 (4.6-11) | 7.5 (5.8-9.6) | 0.86  | 3.3 (2.5-4.0) | 4.7 (3.5-6.3) | 1.8 (1.1-2.8) | <0.01 | 1.3 (0.7-1.9) | 1.3 (0.6-2.4) | 1.3 (0.6-2.5) | >0.99 | 6.7 (5.6-7.8) | 4.1 (2.9-5.7) | 9.1 (7.3-11) | <0.01 |
| Aware of having diabetes (n)         | 120          | 51            | 69          |       | 55            | 22            | 33            |      | 61            | 16           | 45            |       | 18            | 16            | 2             |       | 15            | 8             | 7             |       | 59            | 17            | 42           |       |
| Aware of having diabetes (%)         | 63 (56-70)   | 71 (59-81)    | 58 (49-67)  | 0.08  | 60 (49-70)    | 55 (39-71)    | 64 (50-76)    | 0.41 | 58 (48-68)    | 57 (37-76)   | 58 (47-70)    | 0.90  | 25 (16-37)    | 32 (20-47)    | 9.5 (1.2-30)  | 0.05  | 65 (43-84)    | 73 (39-94)    | 58 (28-85)    | 0.47  | 45 (36-54)    | 46 (30-63)    | 45 (34-55)   | 0.90  |
| Reporting treatment for diabetes (n) | NA           | NA            | NA          |       | 41            | 18            | 23            |      | 54            | 11           | 43            |       | 4             | 3             | 1             |       | 7             | 4             | 3             |       | 46            | 14            | 32           |       |
| Reporting treatment for diabetes (%) | NA           | NA            | NA          |       | 75 (61-85)    | 82 (60-95)    | 70 (51-84)    | 0.31 | 89 (78-95)    | 69 (41-89)   | 96 (85-100)   | <0.01 | 22 (6.4-48)   | 19 (4-46)     | 50 (1.3-99)   | 0.32  | 47 (21-73)    | 50 (16-84)    | 43 (9.9-82)   | 0.78  | 78 (65-88)    | 82 (57-96)    | 76 (61-88)   | 0.60  |
| Diabetes controlled (n)              | NA           | NA            | NA          |       | 13            | 5             | 8             |      | 25            | 4            | 21            |       | 2             | 1             | 1             |       | 4             | 3             | 1             |       | 14            | 6             | 8            |       |
| Diabetes controlled (%)              | NA           | NA            | NA          |       | 32 (18-48)    | 28 (9.7-54)   | 35 (16-57)    | 0.63 | 46 (33-60)    | 36 (11-69)   | 49 (33-65)    | 0.46  | 50 (6.8-93)   | 33 (0.8-91)   | 100 (-)       | 0.68  | 57 (18-90)    | 75 (19-99)    | 33 (0.8-91)   | 0.27  | 30 (18-46)    | 43 (18-71)    | 25 (12-43)   | 0.23  |

T: total, M:men, W:women; prevalences are given as estimates and 95% confidence intervals. p value for men vs women and calculated using chi-squared or Fisher's exact test. NA-not applicable as these data were not collected

**Table S3. Factors associated with odds of having diabetes across three sub-Saharan African sites with high HIV prevalence (Agincourt, Dikgale & Nairobi)<sup>1</sup>**

|                                     | Odds ratio | 95% confidence interval | p value |
|-------------------------------------|------------|-------------------------|---------|
| Age                                 | 1.1        | 1.0-1.1                 | <0.01   |
| <b>Sex</b>                          |            |                         |         |
| Women                               | reference  |                         |         |
| Men                                 | 0.8        | 0.5-1.2                 | 0.21    |
| <b>Marital status</b>               |            |                         |         |
| Currently married or cohabitating   | reference  |                         |         |
| Never married or cohabitating       | 1.2        | 0.8-1.8                 | 0.37    |
| Previously married                  | 1.0        | 0.8-1.4                 | 0.91    |
| <b>Educational attainment</b>       |            |                         |         |
| No formal education                 | reference  |                         |         |
| Primary education                   | 1.5        | 1.0-2.2                 | 0.07    |
| Secondary education                 | 1.2        | 0.8-1.9                 | 0.44    |
| Tertiary education                  | 1.2        | 0.6-2.6                 | 0.60    |
| <b>Employment status</b>            |            |                         |         |
| Unemployed                          | reference  |                         |         |
| Employed                            | 1.2        | 0.9-1.6                 | 0.19    |
| <b>Smoking status</b>               |            |                         |         |
| No history of smoking               | reference  |                         |         |
| Current smoker                      | 0.6        | 0.4-1.1                 | 0.08    |
| <b>History of hypertension</b>      |            |                         |         |
| No                                  | reference  |                         |         |
| Yes                                 | 2.0        | 1.5-2.6                 | <0.01   |
| <b>HIV status</b>                   |            |                         |         |
| Negative                            | reference  |                         |         |
| Positive                            | 0.5        | 0.4-0.8                 | <0.01   |
| <b>Family history of diabetes</b>   |            |                         |         |
| No                                  | reference  |                         |         |
| Yes                                 | 3.6        | 2.8-4.7                 | <0.01   |
| <b>Physical activity categories</b> |            |                         |         |
| Absent                              | reference  |                         |         |
| Insufficient                        | 1.4        | 0.7-3.0                 | 0.33    |
| Sufficient                          | 1.1        | 0.6-2.0                 | 0.73    |
| Hip circumference                   | 1.0        | 1.0-1.0                 | <0.01   |
| Visceral fat                        | 1.2        | 1.1-1.2                 | <0.01   |
| Subcutaneous fat                    | 1.3        | 1.1-1.4                 | <0.01   |

<sup>1</sup>3929 participants were included in the analysis

**Table S4. Factors associated with odds of having diabetes across two sub-Saharan African sites with low HIV prevalence (Navrongo & Nanoro)<sup>1</sup>**

|                                     | Odds ratio | 95% confidence interval | p value |
|-------------------------------------|------------|-------------------------|---------|
| Age                                 | 1.0        | 1.0-1.1                 | 0.18    |
| <b>Sex</b>                          |            |                         |         |
| Women                               | reference  |                         |         |
| Men                                 | 1.9        | 1.1-3.3                 | 0.03    |
| <b>Marital status</b>               |            |                         |         |
| Currently married or cohabitating   | reference  |                         |         |
| Never married or cohabitating       | 1.8        | 0.2-14.2                | 0.58    |
| Previously married                  | 1.2        | 0.6-2.3                 | 0.68    |
| <b>Educational attainment</b>       |            |                         |         |
| No formal education                 | reference  |                         |         |
| Primary education                   | 0.5        | 0.2-1.2                 | 0.12    |
| Secondary education                 | 0.9        | 0.4-2.5                 | 0.91    |
| Tertiary education                  | 3.7        | 1.0-13.9                | 0.05    |
| <b>Employment status</b>            |            |                         |         |
| Unemployed                          | reference  |                         |         |
| Employed                            | 1.8        | 0.8-3.9                 | 0.13    |
| <b>Smoking status</b>               |            |                         |         |
| No history of smoking               | reference  |                         |         |
| Current smoker                      | 0.9        | 0.3-2.6                 | 0.79    |
| <b>History of hypertension</b>      |            |                         |         |
| No                                  | reference  |                         |         |
| Yes                                 | 1.2        | 0.7-2.1                 | 0.50    |
| <b>HIV status</b>                   |            |                         |         |
| Negative                            | reference  |                         |         |
| Positive                            | 1.7        | 0.2-13.5                | 0.63    |
| <b>Family history of diabetes</b>   |            |                         |         |
| No                                  | reference  |                         |         |
| Yes                                 | 10.4       | 4.3-25.4                | <0.01   |
| <b>Physical activity categories</b> |            |                         |         |
| Absent                              | reference  |                         |         |
| Insufficient                        | 0.5        | 0.1-1.7                 | 0.23    |
| Sufficient                          | 0.5        | 0.3-0.8                 | 0.01    |
| Hip circumference                   | 1.0        | 1.0-1.1                 | 0.02    |
| Visceral fat                        | 1.2        | 1.0-1.4                 | 0.14    |
| Subcutaneous fat                    | 1.1        | 0.7-1.9                 | 0.72    |

<sup>1</sup>3496 participants were included in the analysis

**Table S5. Factors associated with awareness in high HIV prevalence sites (Agincourt, Dikgale, Nairobi & Soweto)<sup>1</sup>**

|                                   | Odds Ratio | 95% confidence interval | p value |
|-----------------------------------|------------|-------------------------|---------|
| Age                               | 1.0        | 1.0-1.1                 | 0.09    |
| <b>Sex</b>                        |            |                         |         |
| Women                             | reference  |                         |         |
| Men                               | 1.0        | 0.6-1.6                 | 0.85    |
| <b>Marital status</b>             |            |                         |         |
| Currently married or cohabitating | reference  |                         |         |
| Never married or cohabitating     | 1.0        | 0.5-2.1                 | 0.93    |
| Previously married                | 0.9        | 0.5-1.4                 | 0.60    |
| <b>Educational attainment</b>     |            |                         |         |
| No formal education               | reference  |                         |         |
| Primary education                 | 1.1        | 0.5-2.3                 | 0.86    |
| Secondary education               | 1.4        | 0.7-3.2                 | 0.37    |
| Tertiary education                | 1.2        | 0.4-3.9                 | 0.79    |
| <b>Employment status</b>          |            |                         |         |
| Unemployed                        | reference  |                         |         |
| Employed                          | 0.8        | 0.5-1.2                 | 0.20    |
| <b>History of hypertension</b>    |            |                         |         |
| No                                | reference  |                         |         |
| Yes                               | 1.9        | 1.2-2.9                 | 0.01    |
| <b>HIV status</b>                 |            |                         |         |
| Negative                          | reference  |                         |         |
| Positive                          | 2.1        | 1.1-4.0                 | 0.03    |
| Body mass index                   | 1.0        | 0.9-1.0                 | 0.17    |

<sup>1</sup>397 participants were included in the analysis

STROBE Statement—Checklist of items that should be included in reports of *cross-sectional studies*

|                              | Item No                                                                            | Recommendation                                                                                                                                                                                    | Page No          |
|------------------------------|------------------------------------------------------------------------------------|---------------------------------------------------------------------------------------------------------------------------------------------------------------------------------------------------|------------------|
| <b>Title and abstract</b>    | 1                                                                                  | (a) Indicate the study's design with a commonly used term in the title or the abstract                                                                                                            | 3                |
|                              |                                                                                    | (b) Provide in the abstract an informative and balanced summary of what was done and what was found                                                                                               | 3-4              |
| <b>Introduction</b>          |                                                                                    |                                                                                                                                                                                                   |                  |
| Background/rationale         | 2                                                                                  | Explain the scientific background and rationale for the investigation being reported                                                                                                              | 6-7              |
| Objectives                   | 3                                                                                  | State specific objectives, including any prespecified hypotheses                                                                                                                                  | 7                |
| <b>Methods</b>               |                                                                                    |                                                                                                                                                                                                   |                  |
| Study design                 | 4                                                                                  | Present key elements of study design early in the paper                                                                                                                                           | 7-8              |
| Setting                      | 5                                                                                  | Describe the setting, locations, and relevant dates, including periods of recruitment, exposure, follow-up, and data collection                                                                   | 7-8              |
| Participants                 | 6                                                                                  | (a) Give the eligibility criteria, and the sources and methods of selection of participants                                                                                                       | 7-8              |
| Variables                    | 7                                                                                  | Clearly define all outcomes, exposures, predictors, potential confounders, and effect modifiers. Give diagnostic criteria, if applicable                                                          | 8-10             |
| Data sources/<br>measurement | 8*                                                                                 | For each variable of interest, give sources of data and details of methods of assessment (measurement). Describe comparability of assessment methods if there is more than one group              | 8-10             |
| Bias                         | 9                                                                                  | Describe any efforts to address potential sources of bias                                                                                                                                         | 10-11            |
| Study size                   | 10                                                                                 | Explain how the study size was arrived at                                                                                                                                                         | 7-8              |
| Quantitative variables       | 11                                                                                 | Explain how quantitative variables were handled in the analyses. If applicable, describe which groupings were chosen and why                                                                      | 10-12            |
| Statistical methods          | 12                                                                                 | (a) Describe all statistical methods, including those used to control for confounding                                                                                                             | 10-12            |
|                              |                                                                                    | (b) Describe any methods used to examine subgroups and interactions                                                                                                                               | 10-12            |
|                              | (c) Explain how missing data were addressed                                        | 12                                                                                                                                                                                                |                  |
|                              | (d) If applicable, describe analytical methods taking account of sampling strategy | n/a                                                                                                                                                                                               |                  |
|                              | (e) Describe any sensitivity analyses                                              | 11-12                                                                                                                                                                                             |                  |
| <b>Results</b>               |                                                                                    |                                                                                                                                                                                                   |                  |
| Participants                 | 13*                                                                                | (a) Report numbers of individuals at each stage of study—eg numbers potentially eligible, examined for eligibility, confirmed eligible, included in the study, completing follow-up, and analysed | 12,15            |
|                              |                                                                                    | (b) Give reasons for non-participation at each stage                                                                                                                                              | 15               |
|                              |                                                                                    | (c) Consider use of a flow diagram                                                                                                                                                                |                  |
| Descriptive data             | 14*                                                                                | (a) Give characteristics of study participants (eg demographic, clinical, social) and information on exposures and potential confounders                                                          | 12-14            |
|                              |                                                                                    | (b) Indicate number of participants with missing data for each variable of interest                                                                                                               | 13-15,<br>17, 18 |
| Outcome data                 | 15*                                                                                | Report numbers of outcome events or summary measures                                                                                                                                              | 15               |

|    |                          |    |                                                                                                                                                                                                              |
|----|--------------------------|----|--------------------------------------------------------------------------------------------------------------------------------------------------------------------------------------------------------------|
| 1  |                          |    |                                                                                                                                                                                                              |
| 2  | Main results             | 16 | (a) Give unadjusted estimates and, if applicable, confounder-adjusted estimates and their precision (eg, 95% confidence interval). Make clear which confounders were adjusted for and why they were included |
| 3  |                          |    |                                                                                                                                                                                                              |
| 4  |                          |    |                                                                                                                                                                                                              |
| 5  |                          |    |                                                                                                                                                                                                              |
| 6  |                          |    | (b) Report category boundaries when continuous variables were categorized                                                                                                                                    |
| 7  |                          |    |                                                                                                                                                                                                              |
| 8  |                          |    | (c) If relevant, consider translating estimates of relative risk into absolute risk for a meaningful time period                                                                                             |
| 9  |                          |    |                                                                                                                                                                                                              |
| 10 |                          |    |                                                                                                                                                                                                              |
| 11 | Other analyses           | 17 | Report other analyses done—eg analyses of subgroups and interactions, and sensitivity analyses                                                                                                               |
| 12 |                          |    |                                                                                                                                                                                                              |
| 13 |                          |    |                                                                                                                                                                                                              |
| 14 | <b>Discussion</b>        |    |                                                                                                                                                                                                              |
| 15 | Key results              | 18 | Summarise key results with reference to study objectives                                                                                                                                                     |
| 16 | Limitations              | 19 | Discuss limitations of the study, taking into account sources of potential bias or imprecision. Discuss both direction and magnitude of any potential bias                                                   |
| 17 |                          |    |                                                                                                                                                                                                              |
| 18 |                          |    |                                                                                                                                                                                                              |
| 19 |                          |    |                                                                                                                                                                                                              |
| 20 | Interpretation           | 20 | Give a cautious overall interpretation of results considering objectives, limitations, multiplicity of analyses, results from similar studies, and other relevant evidence                                   |
| 21 |                          |    |                                                                                                                                                                                                              |
| 22 |                          |    |                                                                                                                                                                                                              |
| 23 |                          |    |                                                                                                                                                                                                              |
| 24 | Generalisability         | 21 | Discuss the generalisability (external validity) of the study results                                                                                                                                        |
| 25 |                          |    |                                                                                                                                                                                                              |
| 26 | <b>Other information</b> |    |                                                                                                                                                                                                              |
| 27 | Funding                  | 22 | Give the source of funding and the role of the funders for the present study and, if applicable, for the original study on which the present article is based                                                |
| 28 |                          |    |                                                                                                                                                                                                              |
| 29 |                          |    |                                                                                                                                                                                                              |
| 30 |                          |    |                                                                                                                                                                                                              |

31 \*Give information separately for exposed and unexposed groups.

32  
33  
34 **Note:** An Explanation and Elaboration article discusses each checklist item and gives methodological background and published examples of transparent reporting. The STROBE checklist is best used in conjunction with this article (freely available on the Web sites of PLoS Medicine at <http://www.plosmedicine.org/>, Annals of Internal Medicine at <http://www.annals.org/>, and Epidemiology at <http://www.epidem.com/>). Information on the STROBE Initiative is available at [www.strobe-statement.org](http://www.strobe-statement.org).
