# Supplementary material for: Diabetes care cascade and associated factors in 10 700 middle-aged adults in four sub-Saharan African countries: a cross-sectional study
Source: PubMed Central journal article supplement — BMJ Open. 2023 Apr 27;13(4):e069193. doi: 10.1136/bmjopen-2022-069193 (PMC10151877; doi:10.1136/bmjopen-2022-069193), 2023-04-27
Supplement: bmjopen-2022-069193supp001.pdf [file bmjopen-2022-069193supp001.pdf]

**Supplemental material**

Supplemental Table S1. Demographic and clinical characteristics of 10,700 study participants in six sub-Saharan African sites

Supplemental Table S2. Diabetes care cascade by study site

Supplemental Table S3. Factors associated with odds of having diabetes across three sub-Saharan African sites with high HIV prevalence (Agincourt, Dikgale & Nairobi)

Supplemental Table S4. Factors associated with odds of having diabetes across two sub-Saharan African sites with low HIV prevalence (Navrongo & Nanoro)

Supplemental Table S5. Factors associated with awareness in high HIV prevalence sites (Agincourt, Dikgale, Nairobi & Soweto)

**Table S1. Demographic and clinical characteristics of 10,700 study participants in six sub-Saharan African sites**

|                                   | Soweto            |                   |                   | Agincourt         |                   |                   | Dikgale           |                   |                   | Nanoro            |                   |                   | Navrongo          |                   |                   | Nairobi           |                   |                   | Overall           |                   |                   |
|-----------------------------------|-------------------|-------------------|-------------------|-------------------|-------------------|-------------------|-------------------|-------------------|-------------------|-------------------|-------------------|-------------------|-------------------|-------------------|-------------------|-------------------|-------------------|-------------------|-------------------|-------------------|-------------------|
|                                   | Men               | Women             | Overall           |
|                                   | n=1,025<br>51%    | n=1,002<br>49%    | n=2,027           | n=573<br>39%      | n=892<br>61%      | n=1,465           | n=356<br>31%      | n=812<br>69%      | n=1,168           | n=1,045<br>50%    | n=1,039<br>50%    | n=2,084           | n=923<br>46%      | n=1,091<br>54%    | n=2,014           | n=886<br>46%      | n=1,056<br>54%    | n=1,942           | n=4,808<br>45%    | n=5,892<br>55%    | n=10,700          |
| Age (years)                       | 49<br>(44-<br>55) | 49<br>(44-<br>54) | 49<br>(44-<br>54) | 51<br>(45-<br>56) | 51<br>(46-<br>56) | 51<br>(46-<br>56) | 50<br>(45-<br>55) | 51<br>(46-<br>56) | 51<br>(45-<br>55) | 50<br>(44-<br>55) | 50<br>(45-<br>54) | 50<br>(45-<br>55) | 50<br>(46-<br>55) | 52<br>(47-<br>56) | 51<br>(46-<br>56) | 48<br>(44-<br>53) | 48<br>(44-<br>52) | 48<br>(44-<br>53) | 50<br>(45-<br>55) | 50<br>(45-<br>55) | 50<br>(45-<br>55) |
| Marital status (%)                |                   |                   |                   |                   |                   |                   |                   |                   |                   |                   |                   |                   |                   |                   |                   |                   |                   |                   |                   |                   |                   |
| Currently married/<br>Cohabiting  | 570<br>(56)       | 266<br>(27)       | 836<br>(41)       | 445<br>(78)       | 537<br>(60)       | 982<br>(67)       | 178<br>(50)       | 427<br>(53)       | 605<br>(52)       | 1,021<br>(98)     | 794<br>(76)       | 1,815<br>(87)     | 787<br>(85)       | 694<br>(64)       | 1,481<br>(74)     | 808<br>(91)       | 486<br>(46)       | 1,294<br>(67)     | 3,809<br>(79)     | 3,204<br>(54)     | 7,013<br>(66)     |
| Never married/<br>cohabitating    | 265<br>(26)       | 51<br>(5.1)       | 316<br>(16)       | 75<br>(13)        | 59<br>(6.6)       | 134<br>(9.2)      | 103<br>(29)       | 185<br>(23)       | 288<br>(25)       | 14<br>(1.3)       | 3<br>(0.3)        | 17<br>(0.8)       | 15<br>(1.6)       | 5<br>(0.5)        | 20<br>(1.0)       | 13<br>(1.5)       | 70<br>(6.6)       | 83<br>(4.3)       | 485<br>(10)       | 373<br>(6.3)      | 858<br>(8.0)      |
| Previously<br>married             | 189<br>(19)       | 347<br>(35)       | 536<br>(26)       | 53<br>(9.2)       | 296<br>(33)       | 349<br>(24)       | 75<br>(22)        | 200<br>(25)       | 275<br>(24)       | 8<br>(0.8)        | 238<br>(23)       | 246<br>(12)       | 120<br>(13)       | 392<br>(36)       | 512<br>(26)       | 65<br>(7.3)       | 499<br>(47)       | 564<br>(29)       | 510<br>(11)       | 1,972<br>(33)     | 2,482<br>(23)     |
| Missing                           | 1<br>(0.1)        | 338<br>(34)       | 339<br>(17)       | 0<br>(0)          | 0<br>(0)          | 0<br>(0)          | 0<br>(0)          | 0<br>(0)          | 0<br>(0)          | 2<br>(0.2)        | 4<br>(0.4)        | 6<br>(0.3)        | 1<br>(0.1)        | 0<br>(0)          | 1<br>(0.1)        | 0<br>(0)          | 1<br>(0.1)        | 1<br>(0.1)        | 4<br>(0.1)        | 343<br>(5.8)      | 347<br>(3.2)      |
| Highest level of<br>education (%) |                   |                   |                   |                   |                   |                   |                   |                   |                   |                   |                   |                   |                   |                   |                   |                   |                   |                   |                   |                   |                   |
| No formal<br>education            | 8<br>(0.8)        | 2<br>(0.2)        | 10<br>(0.5)       | 23<br>(22)        | 280<br>(31)       | 403<br>(28)       | 22<br>(6.2)       | 74<br>(9.1)       | 96<br>(8.2)       | 758<br>(73)       | 960<br>(92)       | 1,718<br>(82)     | 570<br>(62)       | 843<br>(77)       | 1,413<br>(70)     | 34<br>(3.8)       | 113<br>(11)       | 147<br>(7.6)      | 1,515<br>(32)     | 2,272<br>(39)     | 3,787<br>(35)     |
| Primary<br>education              | 117<br>(11)       | 636<br>(64)       | 753<br>(37)       | 235<br>(41)       | 340<br>(38)       | 575<br>(39)       | 113<br>(32)       | 273<br>(34)       | 386<br>(33)       | 181<br>(17)       | 58<br>(5.6)       | 239<br>(12)       | 206<br>(22)       | 177<br>(16)       | 383<br>(19)       | 447<br>(51)       | 663<br>(63)       | 1,110<br>(57)     | 1,299<br>(27)     | 2,147<br>(36)     | 3,446<br>(32)     |
| Secondary<br>education            | 748<br>(73)       | 147<br>(15)       | 895<br>(44)       | 175<br>(31)       | 223<br>(25)       | 398<br>(27)       | 204<br>(57)       | 440<br>(54)       | 644<br>(55)       | 86<br>(8.2)       | 10<br>(1)         | 96<br>(4.6)       | 118<br>(13)       | 57<br>(5.2)       | 175<br>(8.7)      | 383<br>(43)       | 276<br>(26)       | 659<br>(34)       | 1,714<br>(36)     | 1,153<br>(20)     | 2,867<br>(27)     |
| Tertiary<br>education             | 152<br>(15)       | 1<br>(0.1)        | 153<br>(7.5)      | 39<br>(6.8)       | 49<br>(5.5)       | 88<br>(6.0)       | 17<br>(4.8)       | 24<br>(3.0)       | 41<br>(3.5)       | 16<br>(1.5)       | 2<br>(0.2)        | 18<br>(0.9)       | 27<br>(2.9)       | 9<br>(0.8)        | 36<br>(1.8)       | 22<br>(2.5)       | 4<br>(0.4)        | 26<br>(1.3)       | 273<br>(5.7)      | 89<br>(1.5)       | 362<br>(3.4)      |
| Missing                           | 0<br>(0)          | 216<br>(22)       | 216<br>(10.7)     | 1<br>(0.2)        | 0<br>(0.0)        | 1<br>(0.1)        | 0<br>(0)          | 1<br>(0.1)        | 1<br>(0.1)        | 4<br>(0.4)        | 9<br>(0.9)        | 13<br>(0.6)       | 2<br>(0.2)        | 5<br>(0.5)        | 7<br>(0.4)        | 0<br>(0)          | 0<br>(0)          | 0<br>(0)          | 7<br>(0.2)        | 231<br>(3.9)      | 238<br>(2.2)      |
| Employed (%)                      | 670<br>(65)       | 547<br>(55)       | 1,217<br>(60)     | 197<br>(34)       | 303<br>(34)       | 500<br>(34)       | 160<br>(45)       | 279<br>(34)       | 439<br>(37)       | 1,026<br>(98)     | 1,030<br>(99)     | 2,056<br>(99)     | 599<br>(65)       | 659<br>(60)       | 1,258<br>(63)     | 860<br>(97)       | 966<br>(92)       | 1,826<br>(94)     | 3,512<br>(73)     | 3,784<br>(64)     | 7,296<br>(68)     |
| Current smoker<br>(%)             | 540<br>(53)       | 49<br>(4.9)       | 589<br>(29)       | 155<br>(27)       | 3<br>(0.3)        | 158<br>(11)       | 225<br>(63)       | 25<br>(3.1)       | 250<br>(21)       | 142<br>(14)       | 0<br>(0)          | 142<br>(6.8)      | 388<br>(42)       | 21<br>(1.9)       | 409<br>(20)       | 208<br>(24)       | 27<br>(2.6)       | 235<br>(12)       | 1,658<br>(35)     | 125<br>(2.1)      | 1,783<br>(17)     |
| Hypertension<br>(%)               | 550<br>(54)       | 552<br>(55)       | 1102<br>(54)      | 251<br>(44)       | 517<br>(58)       | 768<br>(52)       | 116<br>(33)       | 392<br>(49)       | 508<br>(44)       | 215<br>(21)       | 127<br>(12)       | 342<br>(17)       | 227<br>(25)       | 274<br>(25)       | 501<br>(25)       | 204<br>(23)       | 319<br>(30)       | 523<br>(27)       | 1,563<br>(33)     | 2,181<br>(37)     | 3,744<br>(35)     |
| Known HIV<br>positive (%)         | 189<br>(18)       | 121<br>(12)       | 310<br>(15)       | 186<br>(33)       | 304<br>(34)       | 490<br>(33)       | 73<br>(21)        | 175<br>(22)       | 248<br>(21)       | 5<br>(0.5)        | 4<br>(0.4)        | 9<br>(0.4)        | 9<br>(1.0)        | 6<br>(0.6)        | 15<br>(0.7)       | 67<br>(7.6)       | 171<br>(16)       | 238<br>(12)       | 529<br>(11)       | 781<br>(13)       | 1,310<br>(12)     |

|                                      |                      |                        |                       |                      |                       |                       |                     |                       |                       |                     |                     |                     |                     |                     |                     |                     |                       |                      |                     |                      |                      |
|--------------------------------------|----------------------|------------------------|-----------------------|----------------------|-----------------------|-----------------------|---------------------|-----------------------|-----------------------|---------------------|---------------------|---------------------|---------------------|---------------------|---------------------|---------------------|-----------------------|----------------------|---------------------|----------------------|----------------------|
| Family history of diabetes (%)       | NA                   | NA                     | NA                    | 85<br>(15)           | 161<br>(18)           | 246<br>(17)           | 53<br>(15)          | 134<br>(17)           | 187<br>(16)           | 24<br>(2.3)         | 12<br>(1.2)         | 36<br>(1.7)         | 12<br>(1.3)         | 10<br>(0.9)         | 22<br>(1.1)         | 112<br>(13)         | 213<br>(20)           | 325<br>(17)          | 286<br>(6.0)        | 530<br>(9.0)         | 816<br>(7.6)         |
| Body mass index (kg/m <sup>2</sup> ) | 24.2<br>(20.6-28.5)  | 32.9<br>(28.5-37.6)    | 28.4<br>(23-33.9)     | 23<br>(20.3-26.6)    | 28.6<br>(24.1-33.2)   | 26<br>(22.1-31.3)     | 20.6<br>(18.9-24.1) | 30.1<br>(25.3-35.9)   | 26.9<br>(21.1-33.1)   | 21.1<br>(19.2-23.4) | 19.8<br>(18.1-21.6) | 20.4<br>(18.6-22.6) | 20.6<br>(19-22.3)   | 21.4<br>(19.6-23.9) | 21<br>(19.3-23.1)   | 22.2<br>(20-25)     | 26.9<br>(23-31.7)     | 24.4<br>(21.1-28.6)  | 21.7<br>(19.5-24.9) | 25.5<br>(20.8-31.9)  | 23.2<br>(20.1-28.6)  |
| Hip circumference (cm)               | 97.4<br>(90.0-105.3) | 117.5<br>(109.0-127.0) | 107.0<br>(95.7-118.5) | 94.0<br>(89.0-102.0) | 105.0<br>(97.0-113.0) | 100.0<br>(93.0-110.0) | 87.6<br>(83.3-94.9) | 108.7<br>(98.5-118.9) | 101.9<br>(90.1-114.3) | 89.5<br>(85.6-94.9) | 87.8<br>(83.4-92.5) | 88.8<br>(84.5-93.7) | 83.0<br>(79.0-88.0) | 88.0<br>(83.0-94.0) | 86.0<br>(81.0-91.0) | 93.0<br>(87.4-98.9) | 101.0<br>(94.0-110.0) | 97.0<br>(90.0-104.6) | 90.6<br>(85.0-98.0) | 99.0<br>(89.0-112.0) | 94.2<br>(86.6-105.3) |
| Subcutaneous fat (cm)                | 1.4<br>(0.9-2.0)     | .1<br>(2.5-3.9)        | 2.2<br>(1.3-3.2)      | 1.2<br>(0.7-1.7)     | 2.2<br>(1.5-3.0)      | 1.7<br>(1.1-2.7)      | 0.8<br>(0.5-1.2)    | 2.2<br>(1.6-2.9)      | 1.7<br>(0.9-2.6)      | 0.8<br>(0.6-1.2)    | 0.9<br>(0.6-1.2)    | 0.9<br>(0.6-1.2)    | 0.7<br>(0.5-0.9)    | 1.0<br>(0.7-1.5)    | 0.8<br>(0.6-1.2)    | 1.0<br>(0.7-1.5)    | 2.0<br>(1.4-2.4)      | 1.5<br>(1.0-2.1)     | 0.9<br>(0.6-1.4)    | 1.7<br>(1.0-2.6)     | 1.2<br>(0.8-2.1)     |
| Visceral fat (cm)                    | 6.2<br>(5-7.8)       | 4.7<br>(3.5-5.9)       | 5.5<br>(4.2-6.9)      | 6.3<br>(5.2-7.8)     | 5.9<br>(4.2-7.3)      | 6.1<br>(4.6-7.5)      | 5.9<br>(4.7-7.4)    | 6.7<br>(4.9-8.5)      | 6.4<br>(4.9-8.2)      | 4.3<br>(3.5-5.2)    | 4.3<br>(3.6-5.1)    | 4.3<br>(3.5-5.1)    | 4<br>(3.3-4.8)      | 3.3<br>(2.8-4.1)    | 3.6<br>(3-4.5)      | 5<br>(3.9-6.3)      | 4.6<br>(3.6-5.8)      | 4.8<br>(3.7-6)       | 5<br>(3.9-6.5)      | 4.5<br>(3.4-6)       | 4.7<br>(3.6-6.2)     |
| Physical activity categories (%)     |                      |                        |                       |                      |                       |                       |                     |                       |                       |                     |                     |                     |                     |                     |                     |                     |                       |                      |                     |                      |                      |
| Absent                               | 63<br>(6.2)          | 167<br>(17)            | 230<br>(11)           | 106<br>(19)          | 143<br>(16)           | 249<br>(17)           | 3<br>(0.9)          | 8<br>(1)              | 11<br>(1.3)           | 227<br>(22)         | 110<br>(11)         | 337<br>(16)         | 64<br>(7.1)         | 154<br>(14)         | 218<br>(11)         | 6<br>(0.7)          | 19<br>(1.8)           | 25<br>(1.3)          | 469<br>(9.8)        | 601<br>(10)          | 1,070<br>(10)        |
| Insufficient                         | 134<br>(13)          | 283<br>(28)            | 417<br>(21)           | 21<br>(3.7)          | 58<br>(6.5)           | 79<br>(5.4)           | 16<br>(4.5)         | 27<br>(3.3)           | 134<br>(6.9)          | 37<br>(3.5)         | 34<br>(3.3)         | 71<br>(3.4)         | 35<br>(3.9)         | 59<br>(5.4)         | 94<br>(4.7)         | 41<br>(4.6)         | 93<br>(8.8)           | 134<br>(6.9)         | 284<br>(5.9)        | 554<br>(9.4)         | 838<br>(7.9)         |
| Sufficient                           | 828<br>(81)          | 552<br>(55)            | 1,380<br>(68)         | 443<br>(78)          | 686<br>(77)           | 1,129<br>(78)         | 334<br>(95)         | 776<br>(96)           | 1,780<br>(92)         | 781<br>(75)         | 895<br>(86)         | 1,676<br>(80)       | 807<br>(89)         | 874<br>(80)         | 1,681<br>(84)       | 839<br>(95)         | 941<br>(89)           | 1,780<br>(92)        | 4,032<br>(84)       | 4,724<br>(80)        | 8,756<br>(82)        |

Continuous variables are summarised as medians and interquartile ranges and categorical variables as n (%); NA-not applicable

Table S2. Diabetes care cascade by study site

|                                      | Soweto                  |                          |                        |       | Agincourt                |                          |                          |      | Dikgale                  |                         |                          |       | Nanoro                   |                          |                          |       | Navrongo                 |                          |                          |       | Nairobi                  |                          |                         |       |
|--------------------------------------|-------------------------|--------------------------|------------------------|-------|--------------------------|--------------------------|--------------------------|------|--------------------------|-------------------------|--------------------------|-------|--------------------------|--------------------------|--------------------------|-------|--------------------------|--------------------------|--------------------------|-------|--------------------------|--------------------------|-------------------------|-------|
|                                      | T                       | M                        | W                      | p     | T                        | M                        | W                        | p    | T                        | M                       | W                        | p     | T                        | M                        | W                        | p     | T                        | M                        | W                        | p     | T                        | M                        | W                       | p     |
| Sample size                          | 2,027                   | 1,025                    | 1,002                  |       | 1,465                    | 573                      | 892                      |      | 1,168                    | 356                     | 812                      |       | 2,084                    | 1,045                    | 1,039                    |       | 2,014                    | 923                      | 1,091                    |       | 1,942                    | 886                      | 1,056                   |       |
| Diabetes present (n)                 | 191                     | 72                       | 119                    |       | 92                       | 40                       | 52                       |      | 105                      | 28                      | 77                       |       | 71                       | 50                       | 21                       |       | 23                       | 11                       | 12                       |       | 131                      | 37                       | 94                      |       |
| Crude diabetes prevalence (%)        | 9.4<br>(8.2<br>-<br>11) | 7.0<br>(5.5<br>-<br>8.8) | 12<br>(9.9<br>-<br>14) |       | 6.3<br>(5.1<br>-<br>7.6) | 7.0<br>(5.0<br>-<br>9.4) | 5.8<br>(4.4<br>-<br>7.6) |      | 9.0<br>(7.4<br>-<br>11)  | 7.9<br>(5.3<br>-<br>11) | 9.5<br>(7.6<br>-<br>12)  |       | 3.4<br>(2.7<br>-<br>4.3) | 4.8<br>(3.6<br>-<br>6.3) | 2.0<br>(1.3<br>-<br>3.1) |       | 1.1<br>(0.7<br>-<br>1.7) | 1.2<br>(0.6<br>-<br>2.1) | 1.1<br>(0.6<br>-<br>1.9) |       | 6.8<br>(5.7<br>-<br>8.0) | 4.2<br>(3.0<br>-<br>5.7) | 8.9<br>(7.3<br>-<br>11) |       |
| Age-adjusted diabetes prevalence (%) | 9.0<br>(7.8<br>-<br>10) | 6.3<br>(4.9<br>-<br>7.9) | 12<br>(9.7<br>-<br>14) | <0.01 | 5.3<br>(4.1<br>-<br>6.4) | 5.7<br>(4.0<br>-<br>8.1) | 5.0<br>(3.6<br>-<br>6.8) | 0.56 | 7.4<br>(6.0<br>-<br>8.9) | 7.2<br>(4.6<br>-<br>11) | 7.5<br>(5.8<br>-<br>9.6) | 0.86  | 3.3<br>(2.5<br>-<br>4.0) | 4.7<br>(3.5<br>-<br>6.3) | 1.8<br>(1.1<br>-<br>2.8) | <0.01 | 1.3<br>(0.7<br>-<br>1.9) | 1.3<br>(0.6<br>-<br>2.4) | 1.3<br>(0.6<br>-<br>2.5) | >0.99 | 6.7<br>(5.6<br>-<br>7.8) | 4.1<br>(2.9<br>-<br>5.7) | 9.1<br>(7.3<br>-<br>11) | <0.01 |
| Aware of having diabetes (n)         | 120                     | 51                       | 69                     |       | 55                       | 22                       | 33                       |      | 61                       | 16                      | 45                       |       | 18                       | 16                       | 2                        |       | 15                       | 8                        | 7                        |       | 59                       | 17                       | 42                      |       |
| Aware of having diabetes (%)         | 63<br>(56<br>-<br>70)   | 71<br>(59<br>-<br>81)    | 58<br>(49<br>-<br>67)  | 0.08  | 60<br>(49<br>-<br>70)    | 55<br>(39<br>-<br>71)    | 64<br>(50<br>-<br>76)    | 0.41 | 58<br>(48<br>-<br>68)    | 57<br>(37<br>-<br>76)   | 58<br>(47<br>-<br>70)    | 0.90  | 25<br>(16<br>-<br>37)    | 32<br>(20<br>-<br>47)    | 9.5<br>(1.2<br>-<br>30)  | 0.05  | 65<br>(43<br>-<br>84)    | 73<br>(39<br>-<br>94)    | 58<br>(28<br>-<br>85)    | 0.47  | 45<br>(36<br>-<br>54)    | 46<br>(30<br>-<br>63)    | 45<br>(34<br>-<br>55)   | 0.90  |
| Reporting treatment for diabetes (n) | NA                      | NA                       | NA                     |       | 41                       | 18                       | 23                       |      | 54                       | 11                      | 43                       |       | 4                        | 3                        | 1                        |       | 7                        | 4                        | 3                        |       | 46                       | 14                       | 32                      |       |
| Reporting treatment for diabetes (%) | NA                      | NA                       | NA                     |       | 75<br>(61<br>-<br>85)    | 82<br>(60<br>-<br>95)    | 70<br>(51<br>-<br>84)    | 0.31 | 89<br>(78<br>-<br>95)    | 69<br>(41<br>-<br>89)   | 96<br>(85<br>-<br>100)   | <0.01 | 22<br>(6.4<br>-<br>48)   | 19<br>(4<br>-<br>46)     | 50<br>(1.3<br>-<br>99)   | 0.32  | 47<br>(21<br>-<br>73)    | 50<br>(16<br>-<br>84)    | 43<br>(9.9<br>-<br>82)   | 0.78  | 78<br>(65<br>-<br>88)    | 82<br>(57<br>-<br>96)    | 76<br>(61<br>-<br>88)   | 0.60  |
| Diabetes controlled (n)              | NA                      | NA                       | NA                     |       | 13                       | 5                        | 8                        |      | 25                       | 4                       | 21                       |       | 2                        | 1                        | 1                        |       | 4                        | 3                        | 1                        |       | 14                       | 6                        | 8                       |       |
| Diabetes controlled (%)              | NA                      | NA                       | NA                     |       | 32<br>(18<br>-<br>48)    | 28<br>(9.7<br>-<br>54)   | 35<br>(16<br>-<br>57)    | 0.63 | 46<br>(33<br>-<br>60)    | 36<br>(11<br>-<br>69)   | 49<br>(33<br>-<br>65)    | 0.46  | 50<br>(6.8<br>-<br>93)   | 33<br>(0.8<br>-<br>91)   | 100<br>(-)               | 0.68  | 57<br>(18<br>-<br>90)    | 75<br>(19<br>-<br>99)    | 33<br>(0.8<br>-<br>91)   | 0.27  | 30<br>(18<br>-<br>46)    | 43<br>(18<br>-<br>71)    | 25<br>(12<br>-<br>43)   | 0.23  |

T: total, M:men, W:women; prevalences are given as estimates and 95% confidence intervals. p value for men vs women and calculated using chi-squared or Fisher's exact test. NA-not applicable as these data were not collected

**Table S3. Factors associated with odds of having diabetes across three sub-Saharan African sites with high HIV prevalence (Agincourt, Dikgale & Nairobi)<sup>1</sup>**

|                                     | Odds ratio | 95% confidence interval | p value |
|-------------------------------------|------------|-------------------------|---------|
| Age                                 | 1.1        | 1.0-1.1                 | <0.01   |
| <b>Sex</b>                          |            |                         |         |
| Women                               | reference  |                         |         |
| Men                                 | 0.8        | 0.5-1.2                 | 0.21    |
| <b>Marital status</b>               |            |                         |         |
| Currently married or cohabitating   | reference  |                         |         |
| Never married or cohabitating       | 1.2        | 0.8-1.8                 | 0.37    |
| Previously married                  | 1.0        | 0.8-1.4                 | 0.91    |
| <b>Educational attainment</b>       |            |                         |         |
| No formal education                 | reference  |                         |         |
| Primary education                   | 1.5        | 1.0-2.2                 | 0.07    |
| Secondary education                 | 1.2        | 0.8-1.9                 | 0.44    |
| Tertiary education                  | 1.2        | 0.6-2.6                 | 0.60    |
| <b>Employment status</b>            |            |                         |         |
| Unemployed                          | reference  |                         |         |
| Employed                            | 1.2        | 0.9-1.6                 | 0.19    |
| <b>Smoking status</b>               |            |                         |         |
| No history of smoking               | reference  |                         |         |
| Current smoker                      | 0.6        | 0.4-1.1                 | 0.08    |
| <b>History of hypertension</b>      |            |                         |         |
| No                                  | reference  |                         |         |
| Yes                                 | 2.0        | 1.5-2.6                 | <0.01   |
| <b>HIV status</b>                   |            |                         |         |
| Negative                            | reference  |                         |         |
| Positive                            | 0.5        | 0.4-0.8                 | <0.01   |
| <b>Family history of diabetes</b>   |            |                         |         |
| No                                  | reference  |                         |         |
| Yes                                 | 3.6        | 2.8-4.7                 | <0.01   |
| <b>Physical activity categories</b> |            |                         |         |
| Absent                              | reference  |                         |         |
| Insufficient                        | 1.4        | 0.7-3.0                 | 0.33    |
| Sufficient                          | 1.1        | 0.6-2.0                 | 0.73    |
| Hip circumference                   | 1.0        | 1.0-1.0                 | <0.01   |
| Visceral fat                        | 1.2        | 1.1-1.2                 | <0.01   |
| Subcutaneous fat                    | 1.3        | 1.1-1.4                 | <0.01   |

<sup>1</sup>3929 participants were included in the analysis

**Table S4. Factors associated with odds of having diabetes across two sub-Saharan African sites with low HIV prevalence (Navrongo & Nanoro)<sup>1</sup>**

|                                     | Odds ratio | 95% confidence interval | p value |
|-------------------------------------|------------|-------------------------|---------|
| Age                                 | 1.0        | 1.0-1.1                 | 0.18    |
| <b>Sex</b>                          |            |                         |         |
| Women                               | reference  |                         |         |
| Men                                 | 1.9        | 1.1-3.3                 | 0.03    |
| <b>Marital status</b>               |            |                         |         |
| Currently married or cohabitating   | reference  |                         |         |
| Never married or cohabitating       | 1.8        | 0.2-14.2                | 0.58    |
| Previously married                  | 1.2        | 0.6-2.3                 | 0.68    |
| <b>Educational attainment</b>       |            |                         |         |
| No formal education                 | reference  |                         |         |
| Primary education                   | 0.5        | 0.2-1.2                 | 0.12    |
| Secondary education                 | 0.9        | 0.4-2.5                 | 0.91    |
| Tertiary education                  | 3.7        | 1.0-13.9                | 0.05    |
| <b>Employment status</b>            |            |                         |         |
| Unemployed                          | reference  |                         |         |
| Employed                            | 1.8        | 0.8-3.9                 | 0.13    |
| <b>Smoking status</b>               |            |                         |         |
| No history of smoking               | reference  |                         |         |
| Current smoker                      | 0.9        | 0.3-2.6                 | 0.79    |
| <b>History of hypertension</b>      |            |                         |         |
| No                                  | reference  |                         |         |
| Yes                                 | 1.2        | 0.7-2.1                 | 0.50    |
| <b>HIV status</b>                   |            |                         |         |
| Negative                            | reference  |                         |         |
| Positive                            | 1.7        | 0.2-13.5                | 0.63    |
| <b>Family history of diabetes</b>   |            |                         |         |
| No                                  | reference  |                         |         |
| Yes                                 | 10.4       | 4.3-25.4                | <0.01   |
| <b>Physical activity categories</b> |            |                         |         |
| Absent                              | reference  |                         |         |
| Insufficient                        | 0.5        | 0.1-1.7                 | 0.23    |
| Sufficient                          | 0.5        | 0.3-0.8                 | 0.01    |
| Hip circumference                   | 1.0        | 1.0-1.1                 | 0.02    |
| Visceral fat                        | 1.2        | 1.0-1.4                 | 0.14    |
| Subcutaneous fat                    | 1.1        | 0.7-1.9                 | 0.72    |

<sup>1</sup>3496 participants were included in the analysis

**Table S5. Factors associated with awareness in high HIV prevalence sites (Agincourt, Dikgale, Nairobi & Soweto)<sup>1</sup>**

|                                   | Odds Ratio | 95% confidence interval | p value |
|-----------------------------------|------------|-------------------------|---------|
| Age                               | 1.0        | 1.0-1.1                 | 0.09    |
| <b>Sex</b>                        |            |                         |         |
| Women                             | reference  |                         |         |
| Men                               | 1.0        | 0.6-1.6                 | 0.85    |
| <b>Marital status</b>             |            |                         |         |
| Currently married or cohabitating | reference  |                         |         |
| Never married or cohabitating     | 1.0        | 0.5-2.1                 | 0.93    |
| Previously married                | 0.9        | 0.5-1.4                 | 0.60    |
| <b>Educational attainment</b>     |            |                         |         |
| No formal education               | reference  |                         |         |
| Primary education                 | 1.1        | 0.5-2.3                 | 0.86    |
| Secondary education               | 1.4        | 0.7-3.2                 | 0.37    |
| Tertiary education                | 1.2        | 0.4-3.9                 | 0.79    |
| <b>Employment status</b>          |            |                         |         |
| Unemployed                        | reference  |                         |         |
| Employed                          | 0.8        | 0.5-1.2                 | 0.20    |
| <b>History of hypertension</b>    |            |                         |         |
| No                                | reference  |                         |         |
| Yes                               | 1.9        | 1.2-2.9                 | 0.01    |
| <b>HIV status</b>                 |            |                         |         |
| Negative                          | reference  |                         |         |
| Positive                          | 2.1        | 1.1-4.0                 | 0.03    |
| Body mass index                   | 1.0        | 0.9-1.0                 | 0.17    |

<sup>1</sup>397 participants were included in the analysis
